# Supplementary material for: Sequence specificity between interacting and non-interacting homologs identifies interface residues – a homodimer and monomer use case
Source: Springer Nature journal article supplement (doi:10.1186/s12859-015-0758-y), 2015-10-08
Supplement: 12859_2015_758_MOESM1_ESM.pdf [file 12859_2015_758_MOESM1_ESM.pdf]

# Supporting Information to “*Sequence Specificity Between Interacting and Non-interacting Homologs Identifies Interface Residues – a homodimer and monomer use case*”

**Qingzhen Hou<sup>1</sup>, Bas E. Dutilh<sup>2,3,4</sup>, Martijn A. Huynen<sup>3</sup>, Jaap Heringa<sup>1</sup> and K. Anton Feenstra<sup>1</sup>§**

<sup>1</sup>Center for Integrative Bioinformatics VU (IBIVU), VU University Amsterdam, De Boelelaan 1081A, 1081 HV Amsterdam, The Netherlands

<sup>2</sup>Theoretical Biology and Bioinformatics, Utrecht University, Padualaan 8, 3584 CH, Utrecht, The Netherlands.

<sup>3</sup>Centre for Molecular and Biomolecular Informatics, Radboud Institute for Molecular Life Sciences, Radboud University Medical Centre, Geert Grooteplein 28, 6525 GA Nijmegen, The Netherlands

<sup>4</sup>Department of Marine Biology, Institute of Biology, Federal University of Rio de Janeiro, Brazil

§Corresponding author: K. Anton Feenstra [k.a.feenstra@vu.nl](mailto:k.a.feenstra@vu.nl)

Email addresses:

QH: [q.hou@vu.nl](mailto:q.hou@vu.nl)

BED: [bedutilh@gmail.com](mailto:bedutilh@gmail.com)

MAH: [m.huynen@cmbi.ru.nl](mailto:m.huynen@cmbi.ru.nl)

JH: [j.heringa@vu.nl](mailto:j.heringa@vu.nl)

KAF: [k.a.feenstra@vu.nl](mailto:k.a.feenstra@vu.nl)

**Table 1. Number of pair-groups in different pair-group datasets (Test-set 1)**

| %identity | <100 | <99 | <98 | <95 | <90 | <80 | <70 | <60 | <50 | <40 |
|-----------|------|-----|-----|-----|-----|-----|-----|-----|-----|-----|
| Number    | 1593 | 955 | 725 | 665 | 638 | 566 | 523 | 454 | 334 | 230 |

**Table 2. Number of pair-groups and predicting performance (AUC) after filtering on minimal HSP length (Test-set 1)**

| HSP-length | ≥0    | ≥25   | ≥50   | ≥75   | ≥100  | ≥125  | ≥150  | ≥175  | ≥200  | ≥225  | ≥250  | ≥275  | %iden |
|------------|-------|-------|-------|-------|-------|-------|-------|-------|-------|-------|-------|-------|-------|
| AUC        | 0.517 | 0.518 | 0.521 | 0.528 | 0.551 | 0.576 | 0.583 | 0.596 | 0.591 | 0.593 | 0.599 | 0.599 |       |
| Number     | 1593  | 1525  | 1053  | 647   | 317   | 206   | 152   | 124   | 110   | 67    | 54    | 38    | <100  |
| AUC        | 0.517 | 0.518 | 0.519 | 0.525 | 0.556 | 0.587 | 0.618 | 0.64  | 0.647 | 0.638 | 0.639 | 0.639 |       |
| Number     | 955   | 915   | 619   | 395   | 150   | 93    | 56    | 42    | 32    | 18    | 13    | 10    | <99   |
| AUC        | 0.524 | 0.525 | 0.53  | 0.543 | 0.559 | 0.583 | 0.617 | 0.642 | 0.65  | 0.643 | 0.645 | 0.645 |       |
| Number     | 725   | 686   | 436   | 242   | 138   | 88    | 54    | 42    | 31    | 17    | 13    | 10    | <98   |
| AUC        | 0.525 | 0.526 | 0.531 | 0.546 | 0.557 | 0.582 | 0.617 | 0.641 | 0.652 | 0.644 | 0.649 | 0.648 |       |
| Number     | 665   | 623   | 400   | 220   | 125   | 79    | 48    | 37    | 26    | 12    | 8     | 5     | <95   |
| AUC        | 0.522 | 0.524 | 0.527 | 0.541 | 0.56  | 0.582 | 0.616 | 0.637 | 0.643 | 0.635 | 0.645 | 0.642 |       |
| Number     | 638   | 596   | 384   | 211   | 120   | 75    | 45    | 37    | 26    | 12    | 8     | 5     | <90   |
| AUC        | 0.522 | 0.523 | 0.527 | 0.546 | 0.565 | 0.59  | 0.625 | 0.645 | 0.646 | 0.637 | 0.645 | 0.642 |       |
| Number     | 566   | 529   | 345   | 190   | 105   | 67    | 41    | 33    | 25    | 12    | 8     | 5     | <80   |
| AUC        | 0.524 | 0.525 | 0.53  | 0.544 | 0.564 | 0.593 | 0.628 | 0.65  | 0.65  | 0.636 | 0.645 | 0.642 |       |
| Number     | 523   | 483   | 312   | 177   | 92    | 57    | 37    | 30    | 23    | 12    | 8     | 5     | <70   |
| AUC        | 0.524 | 0.526 | 0.531 | 0.547 | 0.565 | 0.595 | 0.63  | 0.644 | 0.645 | 0.636 | 0.645 | 0.642 |       |
| Number     | 454   | 418   | 268   | 153   | 81    | 50    | 32    | 27    | 22    | 12    | 8     | 5     | <60   |
| AUC        | 0.525 | 0.528 | 0.533 | 0.546 | 0.57  | 0.597 | 0.621 | 0.646 | 0.651 | 0.642 | 0.676 | 0.672 |       |
| Number     | 334   | 306   | 197   | 108   | 55    | 31    | 23    | 17    | 12    | 8     | 5     | 3     | <50   |
| AUC        | 0.524 | 0.526 | 0.527 | 0.529 | 0.54  | 0.572 | 0.606 | 0.623 | 0.637 | 0.637 | 0.681 | 0.679 |       |
| Number     | 230   | 209   | 129   | 64    | 27    | 13    | 8     | 7     | 4     | 4     | 3     | 2     | <40   |

**Table 3. Number of pair-group and AUC after filtering on minimal HSP length and minimal sequence length (> 400) (Test-set 1)**

| HSP-length | ≥0    | ≥25   | ≥50   | ≥75   | ≥100  | ≥125  | ≥150  | ≥175  | ≥200  | ≥225  | ≥250  | ≥275  | %identity |
|------------|-------|-------|-------|-------|-------|-------|-------|-------|-------|-------|-------|-------|-----------|
| AUC        | 0.542 | 0.542 | 0.547 | 0.558 | 0.578 | 0.604 | 0.614 | 0.63  | 0.625 | 0.68  | 0.681 | 0.678 |           |
| Number     | 380   | 371   | 284   | 189   | 130   | 99    | 74    | 60    | 52    | 20    | 17    | 10    | <100      |
| AUC        | 0.534 | 0.534 | 0.542 | 0.561 | 0.592 | 0.613 | 0.661 | 0.673 | 0.687 | 0.676 | 0.672 | 0.669 |           |
| Number     | 198   | 194   | 147   | 91    | 56    | 43    | 24    | 21    | 16    | 6     | 3     | 2     | <99       |
| AUC        | 0.535 | 0.535 | 0.544 | 0.559 | 0.584 | 0.601 | 0.66  | 0.678 | 0.695 | 0.684 | 0.672 | 0.669 |           |
| Number     | 181   | 177   | 136   | 85    | 53    | 41    | 23    | 20    | 15    | 5     | 3     | 2     | <98       |
| AUC        | 0.54  | 0.54  | 0.547 | 0.564 | 0.59  | 0.608 | 0.659 | 0.675 | 0.695 | 0.684 | 0.672 | 0.669 |           |
| Number     | 171   | 165   | 125   | 78    | 48    | 38    | 23    | 20    | 15    | 5     | 3     | 2     | <95       |
| AUC        | 0.533 | 0.534 | 0.541 | 0.556 | 0.591 | 0.606 | 0.651 | 0.671 | 0.688 | 0.683 | 0.662 | 0.653 |           |
| Number     | 165   | 159   | 119   | 75    | 47    | 38    | 23    | 20    | 15    | 5     | 3     | 2     | <90       |
| AUC        | 0.541 | 0.542 | 0.549 | 0.571 | 0.611 | 0.628 | 0.675 | 0.694 | 0.694 | 0.684 | 0.662 | 0.653 |           |
| Number     | 140   | 136   | 103   | 63    | 37    | 30    | 19    | 16    | 14    | 5     | 3     | 2     | <80       |
| AUC        | 0.541 | 0.542 | 0.551 | 0.574 | 0.621 | 0.639 | 0.677 | 0.687 | 0.688 | 0.68  | 0.662 | 0.653 |           |
| Number     | 121   | 117   | 87    | 57    | 32    | 25    | 17    | 15    | 13    | 5     | 3     | 2     | <70       |
| AUC        | 0.545 | 0.546 | 0.561 | 0.592 | 0.637 | 0.658 | 0.687 | 0.685 | 0.683 | 0.68  | 0.662 | 0.653 |           |
| Number     | 102   | 97    | 69    | 43    | 27    | 21    | 15    | 14    | 13    | 5     | 3     | 2     | <60       |
| AUC        | 0.532 | 0.534 | 0.551 | 0.588 | 0.638 | 0.636 | 0.659 | 0.67  | 0.672 | 0.674 | 0.662 | 0.653 |           |
| Number     | 77    | 75    | 52    | 28    | 17    | 15    | 11    | 9     | 8     | 4     | 3     | 2     | <50       |
| AUC        | 0.512 | 0.511 | 0.506 | 0.498 | 0.485 | 0.485 | 0.489 |       |       |       |       |       |           |
| Number     | 54    | 51    | 31    | 12    | 2     | 2     | 1     |       |       |       |       |       | <40       |

**Figure 1.** The different trends of SH scores at three kinds of positions with increasing minimal sequence length (0 to 600) of homodimer query sequences. 0 means sequences which have longer than 0 sequence length (i.e., all sequences). The SH of interacting sites was lowest and remained rather stable with increasing minimal sequence length. (**Test-set 1**)

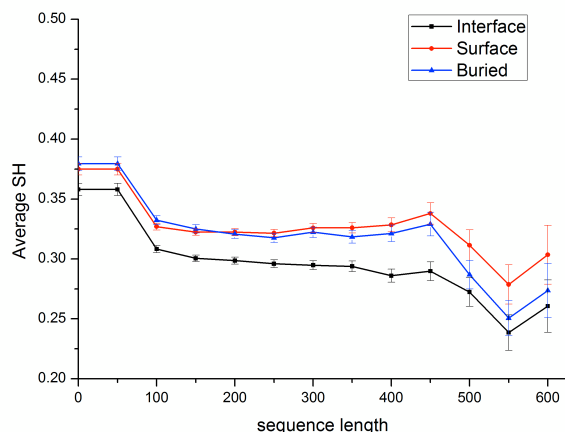

**A**

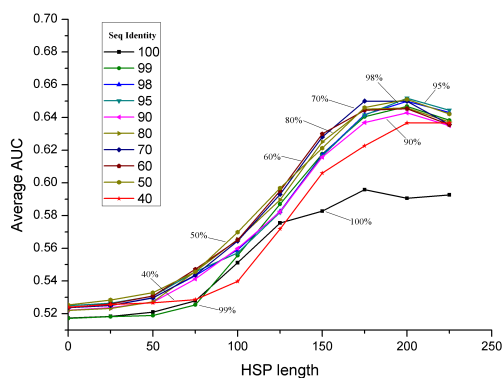

**B**

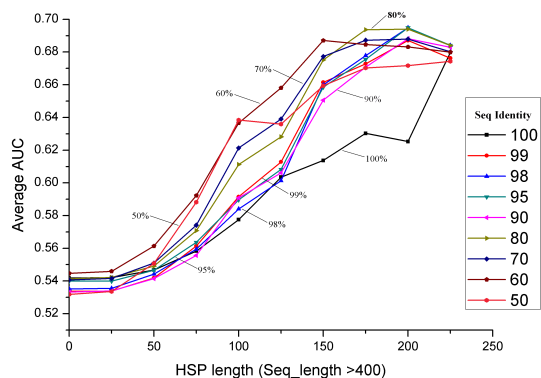

**Figure 2.** (A) Average AUC with the increasing HSP-length from 0 to 225. Each line shows one dataset with identity cutoff. (B) Average AUC versus HSP-length and minimal sequence length 400 for datasets with different identity cutoff. The AUC with the dataset filtering at 40% is not shown because a limited number of groups remain. (**Test-set 1**)

**Figure 3.** ROC-plots measuring performance of interface prediction at different HSP-length with minimal sequence length 400 (<80% ID dataset). The diagonal line represents a random prediction. (**Test-set 1**)

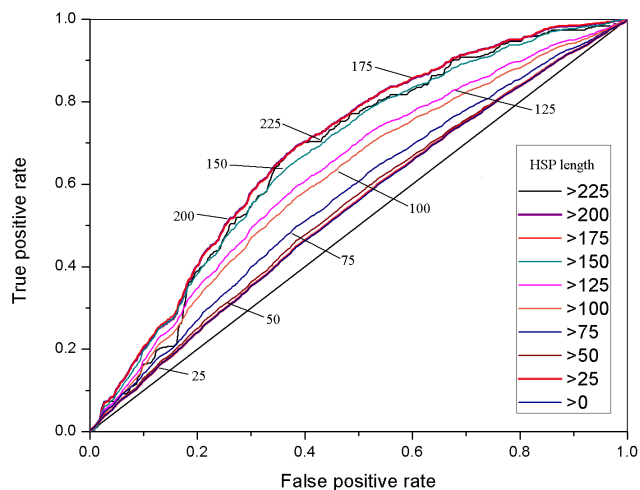

**Figure 4.** ROC-plots measuring interface prediction performance of the two best scoring proteins in our dataset. The diagonal line represents a random prediction.

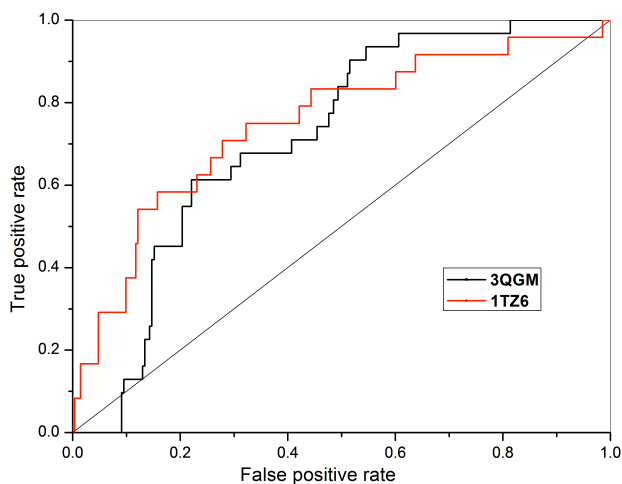

**Figure 5.** Exploring performance of different e\_value cut-off dataset. For example, '-10' means  $10^{-10}$ . 'Mixed' means pair groups mixed in at most 20% monomer sequences to the interacting sub-group and at most 20% homodimers to monomer sub-group (20% homodimers, 80% monomers); 'the lower e\_value' represent using the lower e-value of the two as the same cut-off to separate H/M and M/H to form new groups. The x-axis represents the minimal HSP-length. (**Test-set 1**)

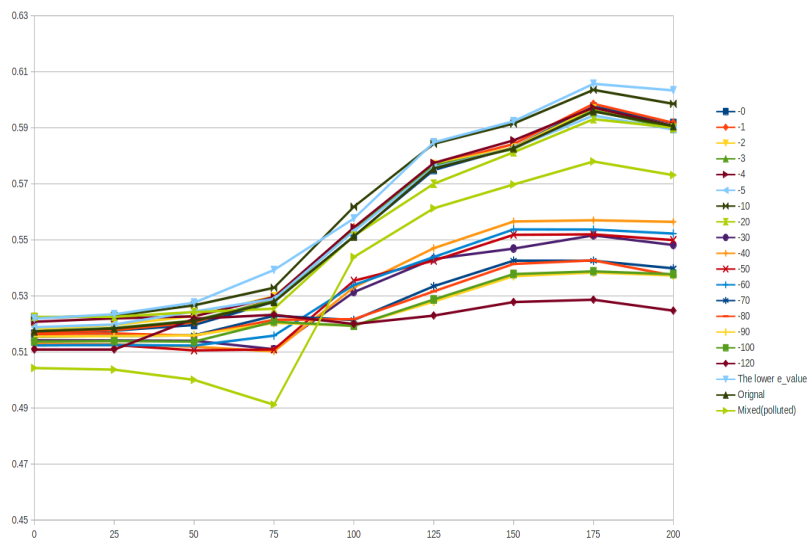

**Figure 6.** Exploring performance of different e\_value cut-off dataset. For example, '-10' means  $10^{-10}$ . 'Mixed' means pair groups mixed in at most 20% monomer sequences to the interacting sub-group and at most 20% homodimers to monomer sub-group (20% homodimers, 80% monomers); 'the lower e\_value' represent using the lower e-value of the two as the same cut-off to separate H/M and M/H to form new groups. The x-axis represents the minimal HSP-length. All the datasets should have a sequence length longer than 400. (**Test-set 1**)

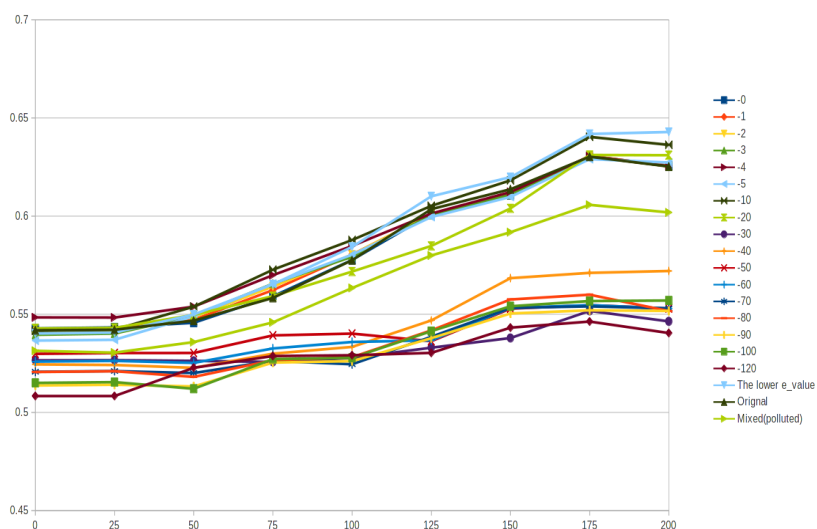

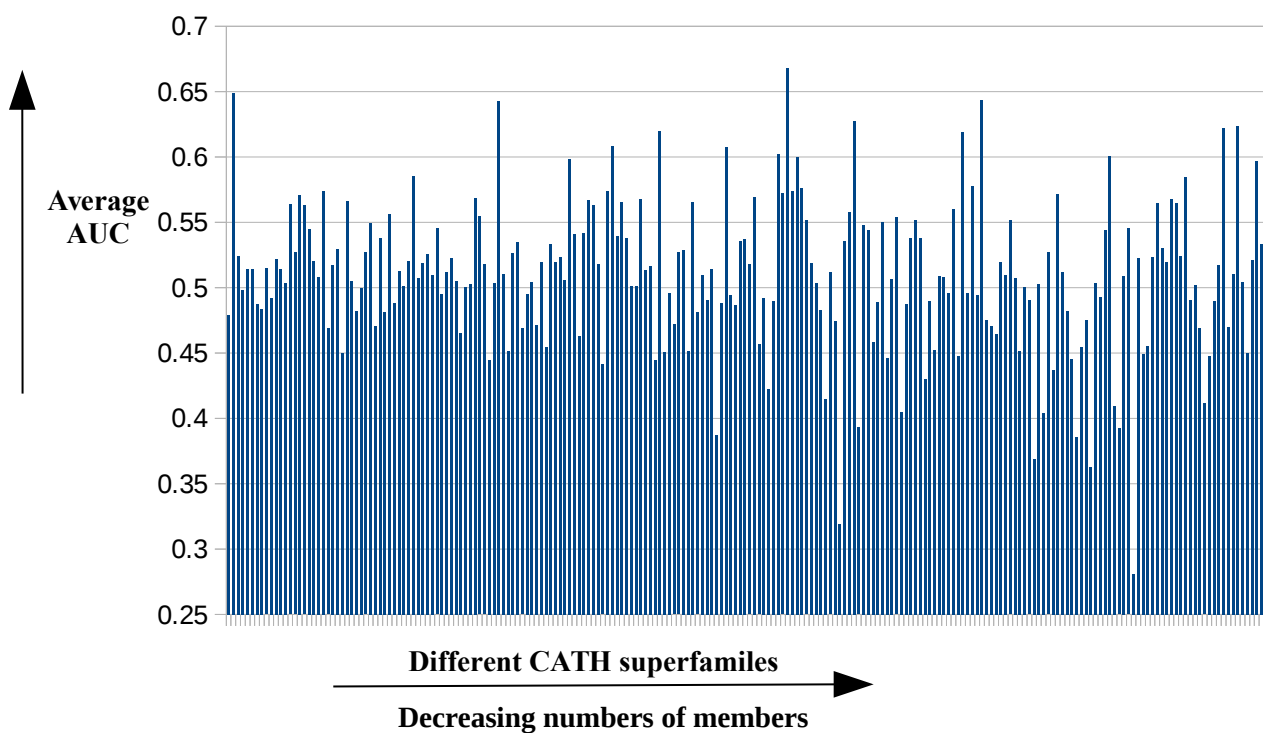

**Fig 7. Average AUC of members in per CATH superfamily (Complete Test-set 1)**  
**The various CATH superfamilies are ordered by Decreasing abundance.**

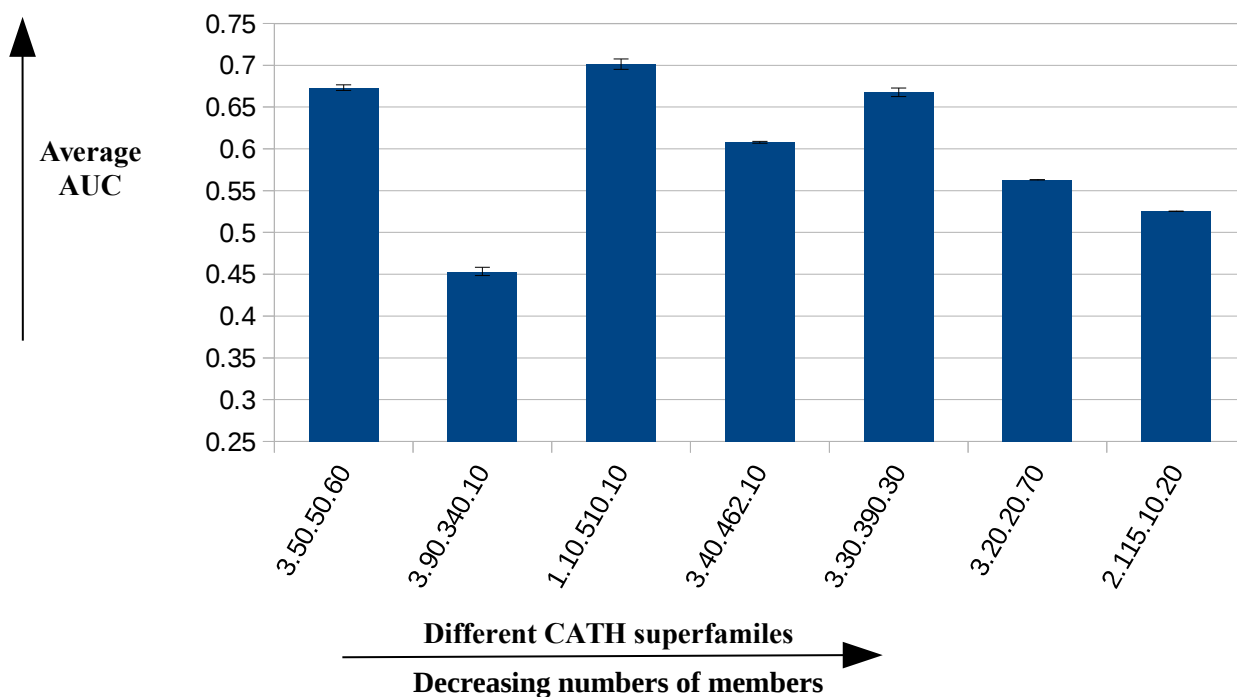

**Fig 8. Average AUC of members in per CATH superfamily (Selected Test-set 1)**  
**The various CATH superfamilies are ordered by Decreasing abundance.**

**Table 4. Number of pair-group and performance of different e\_value cut-off dataset. (All dataset are filtering on minimal HSP length.) (Test-set 1)**

| Hsp-length | 0     | 25    | 50    | 75    | 100   | 125   | 150   | 175   | 200   | Dataset*          |
|------------|-------|-------|-------|-------|-------|-------|-------|-------|-------|-------------------|
| AUC        | 0.517 | 0.518 | 0.52  | 0.528 | 0.551 | 0.575 | 0.583 | 0.598 | 0.592 | e_value < 0       |
| Number     | 1528  | 1463  | 1030  | 636   | 312   | 205   | 151   | 123   | 110   |                   |
| AUC        | 0.517 | 0.518 | 0.521 | 0.529 | 0.554 | 0.577 | 0.584 | 0.599 | 0.592 | e_value < -1      |
| Number     | 1422  | 1366  | 971   | 601   | 294   | 199   | 150   | 122   | 109   |                   |
| AUC        | 0.518 | 0.52  | 0.523 | 0.53  | 0.554 | 0.577 | 0.583 | 0.597 | 0.59  | e_value < -2      |
| Number     | 1359  | 1307  | 936   | 583   | 285   | 193   | 148   | 121   | 108   |                   |
| AUC        | 0.517 | 0.519 | 0.521 | 0.528 | 0.553 | 0.577 | 0.582 | 0.596 | 0.59  | e_value < -3      |
| Number     | 1309  | 1263  | 903   | 570   | 280   | 191   | 147   | 120   | 108   |                   |
| AUC        | 0.521 | 0.522 | 0.523 | 0.53  | 0.554 | 0.577 | 0.586 | 0.597 | 0.591 | e_value < -4      |
| Number     | 1246  | 1204  | 862   | 548   | 271   | 188   | 144   | 119   | 107   |                   |
| AUC        | 0.519 | 0.52  | 0.524 | 0.529 | 0.553 | 0.576 | 0.583 | 0.594 | 0.589 | e_value < -5      |
| Number     | 1197  | 1160  | 843   | 538   | 268   | 187   | 143   | 119   | 107   |                   |
| AUC        | 0.522 | 0.523 | 0.527 | 0.533 | 0.562 | 0.584 | 0.592 | 0.604 | 0.599 | e_value < -10     |
| Number     | 1055  | 1030  | 767   | 490   | 248   | 174   | 133   | 111   | 102   |                   |
| AUC        | 0.523 | 0.523 | 0.524 | 0.525 | 0.551 | 0.57  | 0.581 | 0.593 | 0.59  | e_value < -20     |
| Number     | 802   | 794   | 595   | 389   | 181   | 129   | 101   | 87    | 82    |                   |
| AUC        | 0.514 | 0.514 | 0.514 | 0.511 | 0.531 | 0.543 | 0.547 | 0.552 | 0.548 | e_value < -30     |
| Number     | 630   | 625   | 467   | 313   | 124   | 83    | 62    | 53    | 50    |                   |
| AUC        | 0.513 | 0.513 | 0.512 | 0.51  | 0.533 | 0.547 | 0.557 | 0.557 | 0.556 | e_value < -40     |
| Number     | 544   | 541   | 408   | 287   | 109   | 74    | 55    | 53    | 50    |                   |
| AUC        | 0.512 | 0.512 | 0.511 | 0.511 | 0.535 | 0.543 | 0.552 | 0.552 | 0.55  | e_value < -50     |
| Number     | 500   | 498   | 374   | 269   | 97    | 72    | 55    | 53    | 50    |                   |
| AUC        | 0.512 | 0.512 | 0.512 | 0.516 | 0.534 | 0.544 | 0.554 | 0.554 | 0.552 | e_value < -60     |
| Number     | 423   | 421   | 328   | 234   | 90    | 68    | 53    | 51    | 48    |                   |
| AUC        | 0.515 | 0.516 | 0.516 | 0.523 | 0.521 | 0.533 | 0.543 | 0.543 | 0.54  | e_value < -70     |
| Number     | 258   | 256   | 178   | 98    | 68    | 49    | 38    | 36    | 33    |                   |
| AUC        | 0.516 | 0.517 | 0.516 | 0.521 | 0.522 | 0.532 | 0.541 | 0.543 | 0.537 | e_value < -80     |
| Number     | 240   | 238   | 166   | 89    | 63    | 46    | 35    | 33    | 31    |                   |
| AUC        | 0.515 | 0.516 | 0.516 | 0.52  | 0.519 | 0.528 | 0.537 | 0.538 | 0.537 | e_value < -90     |
| Number     | 208   | 206   | 145   | 85    | 61    | 44    | 35    | 33    | 31    |                   |
| AUC        | 0.514 | 0.514 | 0.514 | 0.521 | 0.519 | 0.529 | 0.538 | 0.539 | 0.538 | e_value < -100    |
| Number     | 192   | 191   | 135   | 81    | 60    | 43    | 34    | 33    | 31    |                   |
| AUC        | 0.511 | 0.511 | 0.522 | 0.523 | 0.52  | 0.523 | 0.528 | 0.529 | 0.525 | e_value < -120    |
| Number     | 136   | 136   | 99    | 58    | 43    | 32    | 27    | 26    | 24    |                   |
| AUC        | 0.522 | 0.523 | 0.528 | 0.539 | 0.558 | 0.585 | 0.592 | 0.606 | 0.603 | The lower e_value |
| Number     | 1216  | 1175  | 829   | 486   | 247   | 167   | 128   | 109   | 96    |                   |
| AUC        | 0.517 | 0.518 | 0.521 | 0.528 | 0.551 | 0.576 | 0.583 | 0.596 | 0.591 | Original          |
| Number     | 1593  | 1525  | 1053  | 647   | 317   | 206   | 152   | 124   | 110   |                   |
| AUC        | 0.504 | 0.504 | 0.5   | 0.491 | 0.544 | 0.561 | 0.57  | 0.578 | 0.573 | Mixed(polluted)   |
| Number     | 1593  | 1525  | 1053  | 647   | 317   | 206   | 152   | 124   | 110   |                   |

\*e.g. -10 means e-values are lower than  $10^{-10}$

**Table 5. Number of pair-group and performance of different e\_value cut-off dataset. (All dataset are filtering on minimal HSP length and minimal sequence length  $\geq 400$  aa) (Test-set 1)**

| Hsp-length | 0     | 25    | 50    | 75    | 100   | 125   | 150   | 175   | 200   | Dataset*          |
|------------|-------|-------|-------|-------|-------|-------|-------|-------|-------|-------------------|
| AUC        | 0.543 | 0.543 | 0.546 | 0.559 | 0.578 | 0.601 | 0.611 | 0.631 | 0.626 | e_value < 0       |
| Number     | 376   | 367   | 281   | 186   | 128   | 99    | 74    | 60    | 52    |                   |
| AUC        | 0.542 | 0.543 | 0.547 | 0.562 | 0.58  | 0.601 | 0.611 | 0.631 | 0.626 | e_value < -1      |
| Number     | 359   | 350   | 271   | 181   | 128   | 99    | 74    | 60    | 52    |                   |
| AUC        | 0.541 | 0.541 | 0.549 | 0.564 | 0.58  | 0.601 | 0.611 | 0.63  | 0.625 | e_value < -2      |
| Number     | 352   | 343   | 268   | 179   | 127   | 98    | 74    | 60    | 52    |                   |
| AUC        | 0.54  | 0.54  | 0.549 | 0.566 | 0.579 | 0.601 | 0.611 | 0.63  | 0.625 | e_value < -3      |
| Number     | 342   | 333   | 261   | 174   | 127   | 98    | 74    | 60    | 52    |                   |
| AUC        | 0.548 | 0.548 | 0.554 | 0.57  | 0.585 | 0.601 | 0.612 | 0.63  | 0.625 | e_value < -4      |
| Number     | 331   | 322   | 250   | 169   | 124   | 98    | 74    | 60    | 52    |                   |
| AUC        | 0.537 | 0.537 | 0.549 | 0.566 | 0.58  | 0.6   | 0.61  | 0.629 | 0.627 | e_value < -5      |
| Number     | 328   | 319   | 248   | 168   | 124   | 98    | 74    | 60    | 52    |                   |
| AUC        | 0.542 | 0.542 | 0.554 | 0.573 | 0.588 | 0.605 | 0.618 | 0.64  | 0.636 | e_value < -10     |
| Number     | 293   | 285   | 227   | 156   | 118   | 93    | 70    | 56    | 51    |                   |
| AUC        | 0.543 | 0.543 | 0.55  | 0.559 | 0.572 | 0.585 | 0.604 | 0.631 | 0.631 | e_value < -20     |
| Number     | 214   | 208   | 164   | 115   | 83    | 63    | 49    | 39    | 36    |                   |
| AUC        | 0.527 | 0.527 | 0.526 | 0.526 | 0.528 | 0.533 | 0.538 | 0.552 | 0.546 | e_value < -30     |
| Number     | 169   | 165   | 127   | 83    | 54    | 36    | 24    | 18    | 16    |                   |
| AUC        | 0.524 | 0.524 | 0.523 | 0.53  | 0.533 | 0.547 | 0.568 | 0.571 | 0.572 | e_value < -40     |
| Number     | 140   | 138   | 101   | 71    | 48    | 31    | 19    | 18    | 16    |                   |
| AUC        | 0.53  | 0.53  | 0.53  | 0.539 | 0.54  | 0.536 | 0.553 | 0.555 | 0.553 | e_value < -50     |
| Number     | 125   | 124   | 89    | 62    | 42    | 29    | 19    | 18    | 16    |                   |
| AUC        | 0.526 | 0.526 | 0.525 | 0.533 | 0.536 | 0.537 | 0.553 | 0.555 | 0.553 | e_value < -60     |
| Number     | 116   | 115   | 80    | 56    | 40    | 27    | 19    | 18    | 16    |                   |
| AUC        | 0.521 | 0.521 | 0.52  | 0.526 | 0.525 | 0.539 | 0.553 | 0.554 | 0.553 | e_value < -70     |
| Number     | 107   | 106   | 74    | 51    | 37    | 25    | 19    | 18    | 16    |                   |
| AUC        | 0.521 | 0.521 | 0.518 | 0.527 | 0.528 | 0.542 | 0.558 | 0.56  | 0.552 | e_value < -80     |
| Number     | 100   | 99    | 69    | 48    | 36    | 25    | 19    | 18    | 16    |                   |
| AUC        | 0.514 | 0.514 | 0.513 | 0.525 | 0.526 | 0.538 | 0.55  | 0.552 | 0.552 | e_value < -90     |
| Number     | 90    | 89    | 61    | 47    | 35    | 24    | 19    | 18    | 16    |                   |
| AUC        | 0.515 | 0.515 | 0.512 | 0.527 | 0.528 | 0.541 | 0.554 | 0.557 | 0.557 | e_value < -100    |
| Number     | 88    | 87    | 59    | 45    | 35    | 24    | 19    | 18    | 16    |                   |
| AUC        | 0.508 | 0.508 | 0.523 | 0.529 | 0.529 | 0.53  | 0.543 | 0.546 | 0.54  | e_value < -120    |
| Number     | 66    | 66    | 42    | 32    | 23    | 18    | 13    | 12    | 10    |                   |
| AUC        | 0.54  | 0.541 | 0.55  | 0.565 | 0.584 | 0.61  | 0.62  | 0.642 | 0.643 | The lower e_value |
| Number     | 340   | 336   | 258   | 172   | 122   | 96    | 73    | 59    | 51    |                   |
| AUC        | 0.542 | 0.542 | 0.547 | 0.558 | 0.578 | 0.604 | 0.614 | 0.63  | 0.625 | Original          |
| Number     | 380   | 371   | 284   | 189   | 130   | 99    | 74    | 60    | 52    |                   |
| AUC        | 0.531 | 0.53  | 0.536 | 0.546 | 0.563 | 0.58  | 0.592 | 0.606 | 0.602 | Mixed(polluted)   |
| Number     | 380   | 371   | 284   | 189   | 130   | 99    | 74    | 60    | 52    |                   |

\*e.g. -10 means e-values are lower than  $10^{-10}$

**Table 6. Student's t-test and p\_values between One cutoff and Original in Fig.8.A (main text)**

| hsp_length | t_score | p_value |
|------------|---------|---------|
| 0          | 1.8223  | 0.06854 |
| 25         | 1.6937  | 0.09046 |
| 50         | 1.5317  | 0.12579 |
| 75         | 1.1365  | 0.256   |
| 100        | 1.4775  | 0.14013 |
| 125        | 1.0263  | 0.30542 |
| 150        | 0.8797  | 0.37978 |
| 175        | 0.7079  | 0.47971 |
| 200        | 0.6791  | 0.49785 |

**Table 7. Student's t-test and p\_values between Mixed and Original in Fig.8.A (main text)**

| hsp_length | t_score | p_value |
|------------|---------|---------|
| 0          | -4.6857 | 3E-006  |
| 25         | -5.0182 | 6E-007  |
| 50         | -5.7404 | 1E-008  |
| 75         | -6.8154 | 1E-011  |
| 100        | -1.0443 | 0.29672 |
| 125        | -1.7696 | 0.07754 |
| 150        | -1.387  | 0.16648 |
| 175        | -1.7441 | 0.0824  |
| 200        | -1.55   | 0.12257 |

**Table 8. List of PDB IDs of all homodimers (Test-set 1)**

|      |      |      |      |      |      |      |      |      |      |
|------|------|------|------|------|------|------|------|------|------|
| 2RE7 | 2JEV | 3NVR | 3C5Q | 3GUQ | 2PSU | 1KNU | 1FWX | 3FI9 | 3SLF |
| 3M8F | 3I4B | 1FFL | 3CZ1 | 1YAV | 305C | 30GH | 1C4K | 4FZ2 | 1CDC |
| 2HOE | 3RYR | 3K00 | 2DLD | 2FBQ | 1I49 | 3IIR | 1XJJ | 2NRK | 1BU3 |
| 3ZYV | 2H80 | 2VEZ | 2Z69 | 4H51 | 4JBY | 4EC4 | 2ZW2 | 3RK0 | 1LBQ |
| 1QLW | 3ZFL | 1MKA | 2W4M | 1PKV | 2GSL | 1BQA | 1Z00 | 1H79 | 4FHZ |
| 20KK | 1S7H | 3VUB | 3C4U | 4F4J | 2RGV | 6ADH | 3KBL | 2XD5 | 3L03 |
| 2A4C | 4JED | 4DJ3 | 2CCD | 2BDT | 3G0I | 3PYI | 3USF | 2GDR | 3DKA |
| 3076 | 3JVW | 3DZD | 2PCG | 1DMN | 3VQR | 1V13 | 2ZN9 | 3GK1 | 3BQR |
| 1T3Z | 3H2P | 2CGF | 2AYU | 2PZZ | 1ZMC | 1G60 | 1J22 | 4H6U | 1YSJ |
| 3ERF | 1X0I | 1VKC | 207P | 1WSW | 1Y03 | 2Q3L | 4HJR | 1SMQ | 2QK0 |
| 3KW1 | 2ZVC | 2P3E | 1VGP | 3AYJ | 1VGW | 4ISS | 205N | 3QFW | 1Z84 |
| 4E8E | 1BXK | 3D0W | 3E70 | 2Y51 | 1BEC | 4IKB | 2CUY | 1Z0S | 3BVB |
| 1HW7 | 4EU1 | 1HT5 | 30CI | 4HVC | 3B12 | 3M9F | 3PJ6 | 1JYS | 4E04 |
| 3ASR | 1E0H | 2H9F | 2RHM | 3H0A | 4HAE | 3F6V | 3MY7 | 4F0L | 4BI5 |
| 2Z3C | 1JWX | 2FGY | 2DKJ | 1TPH | 2C2I | 30QD | 2IVV | 1B15 | 3PWE |
| 1H3F | 3H9P | 3DPT | 1GG0 | 2ETR | 4G8N | 1CQK | 3CKV | 20WD | 3K9G |



|      |      |      |      |      |      |      |      |      |      |
|------|------|------|------|------|------|------|------|------|------|
| 2H98 | 2VW8 | 3TSA | 3KFC | 2Z16 | 1FSY | 2Q0Y | 2EN5 | 3C4I | 3H03 |
| 1KCX | 2I5B | 1T9K | 3F40 | 1CBY | 1ZTD | 1SZR | 1WAB | 1EVU | 1AFS |
| 3C8G | 4GZ8 | 3I3G | 2P2X | 2X69 | 2HSA | 1C6Z | 3T32 | 3A6Q | 3K9D |
| 3TB6 | 2H84 | 3EZG | 2JD3 | 3K20 | 3BPK | 4GP7 | 3VP5 | 2BZ1 | 104S |
| 2FU3 | 1GY7 | 1UJN | 1QRD | 2VS0 | 4E0H | 2IV3 | 3NW2 | 3L31 | 3N3D |
| 1YNH | 3SMQ | 1UQ5 | 4FKC | 1X83 | 2Z30 | 1GSE | 2EL9 | 2XJ9 | 1BJF |
| 3AJX | 3NDO | 2ED3 | 1X8D | 9WGA | 1YBX | 3HM4 | 1XET | 1GXR | 3HE0 |
| 1X6I | 3F1L | 3UUC | 4HF7 | 3LC0 | 2VPF | 3STY | 3I7R | 1VPI | 3KCX |
| 3D5T | 1H0Z | 3MF0 | 1DEK | 3CP2 | 4ESX | 1A64 | 3U48 | 2AUR | 3FBU |
| 4GPA | 2BJ0 | 1YDW | 1B08 | 2H3G | 2DP3 | 4HZ0 | 4IN1 | 4HIA | 3HHE |
| 3GJU | 3K87 | 2UV1 | 3PR8 | 1VGR | 2AJ9 | 3NYY | 3MGK | 3TR0 | 3QNU |
| 1NXM | 2QV2 | 1YWQ | 302R | 3Q63 | 2V5M | 3N3S | 3B8X | 1KBL | 1ZGA |
| 4GA6 | 1SKZ | 2IKQ | 3JVD | 1K49 | 3CWN | 3L1W | 3TAT | 1DQZ | 2F6X |
| 2QFI | 3I6J | 1UB0 | 2I9X | 3QDE | 10CV | 3FDG | 3CKA | 3LM2 | 1PSQ |
| 2VTK | 2YUT | 1V94 | 2C72 | 3R6F | 3PDX | 1BY9 | 2UVK | 3FSE | 1VZZ |
| 2J66 | 1U7H | 30IP | 3TEQ | 3IA6 | 2BKB | 20TP | 4BET | 1WSR | 2VJN |
| 3P8D | 2F5I | 3RUF | 1G0I | 1U08 | 3G10 | 3UYL | 2ZJZ | 3BNI | 3060 |
| 1TXT | 3U2L | 3IJ6 | 2Y6W | 1GGG | 3URR | 1V47 | 1XQB | 1U6Z | 3LNE |
| 4ATV | 4H0J | 30A7 | 1XCV | 2D66 | 1K4Q | 4GBD | 2HTD | 2AN0 | 1QW7 |
| 3QGM | 4HCG | 2FQM | 2EUI | 3G3F | 2Z2A | 1YM5 | 2R2F | 3JU7 | 1DPZ |
| 1DBT | 3KB1 | 2PN2 | 1RK4 | 1U50 | 2HP3 | 3HWK | 2FFJ | 3PD9 | 3VLH |
| 4EW6 | 3C70 | 2AB0 | 4DUQ | 3HV2 | 1JXN | 4AH6 | 2QFN | 2GAK | 5DAA |
| 1ICU | 4AP8 | 2IFC | 1XUA | 2WTH | 4RHN | 3HGV | 1ZYD | 4FL0 | 3MWS |
| 2PWP | 1K41 | 1TED | 2XEC | 1HJ1 | 2ZHH | 3LR8 | 3GYB | 1X2I | 2R78 |
| 3V75 | 1W2Y | 2P53 | 4GAH | 3UPL | 4EAF | 1ID1 | 1IGX | 1P18 | 2IU6 |
| 4EF8 | 2Y7P | 2Z4B | 1LAY | 2AV3 | 4LC8 | 3BWV | 2FPS | 1E3U | 3C3J |
| 3BDD | 3RBY | 3A2B | 1S4N | 1LWD | 1B0W | 4IW9 | 2I8T | 3A9X | 2B9U |
| 3UJS | 3UKM | 3BJX | 1CTN | 106A | 1AXE | 2YVU | 2GT8 | 2X7X | 3W01 |
| 3PMR | 1ZP8 | 1BQ1 | 2PHT | 3E5X | 2QQA | 1FD9 | 30XV | 3Q34 | 4JNH |
| 3BLN | 2PC6 | 1EA9 | 3RW9 | 2Y3H | 3N68 | 2PG3 | 1EEM | 2X9E | 3IHT |
| 3P1Y | 2P70 | 2B0L | 3H0S | 2G3B | 3UX3 | 3K1T | 3PRH | 1AZR | 3QQA |
| 1VQG | 3FF3 | 3SL7 | 1L5B | 1U3Y | 3C4W | 2P1J | 30GP | 2Q1K | 1E9Q |
| 1R8K | 201S | 3F8C | 4DYD | 4IBP | 2CWZ | 1AE2 | 3SZT | 3HL3 | 2EBE |
| 3LGN | 1H1W | 3RM5 | 3NBE | 30HE | 4HSH | 2WS2 | 2EAV | 2D4G | 1VQW |
| 4B0C | 2Z04 | 2FIP | 1B0W | 2IA0 | 4DS3 | 2CA8 | 2ZU2 | 3IE7 | 2GA0 |
| 10M0 | 4FU0 | 2UXH | 1D7C | 1FTX | 3EFY | 1XSQ | 1PY9 | 3QC3 | 3QTY |
| 2WYT | 3NDU | 2JE2 | 3NYD | 3ICU | 2ZN8 | 3KSH | 3KIA | 2IMM | 1E7Q |
| 3NRH | 1XDB | 2DSJ | 3KY7 | 1XR4 | 1E7Y | 2VZX | 3CTY | 3LAD | 3H90 |
| 1DXQ | 2DG7 | 3AWH | 2VSH | 1YBT | 1J7G | 3S5R | 1DWX | 4FVF | 1E90 |
| 1M38 | 4F22 | 4UPJ | 3ZGD | 1TYP | 1JK6 | 2QGY | 4DF1 | 3ATH | 1NPD |
| 3R89 | 3ROW | 3BXZ | 30P6 | 1KU9 | 3IRV | 2WCU | 2BTZ | 3FFM | 3L07 |
| 2HMA | 4HVK | 3I4U | 2RG7 | 4A20 | 2WYI | 2C11 | 3N0Y | 2EC2 | 3FJS |
| 3RZZ | 10AL | 2FCA | 3TV8 | 3GET | 3RCN | 2WK1 | 2IEN | 10SJ | 3LPX |
| 2YG5 | 2NNN | 208I | 1MRX | 1LBK | 3GWK | 3E07 | 1NI5 | 4JQT | 2A02 |
| 4AZ9 | 1BQ6 | 1XA4 | 1V9N | 2RJT | 1H0K | 1JSC | 3K28 | 7HBI | 1QWI |
| 3B0F | 2GLZ | 3NL9 | 3B1Q | 2NS2 | 1KLZ | 3QSQ | 1PRX | 1RZN | 1SD4 |
| 1MC5 | 3PWI | 2WNT | 3LUF | 1H2H | 3AFJ | 1J8B | 1AXA | 2Z1W | 1BQD |
| 2IXA | 2A8L | 3ZUX | 2HGW | 3PDB | 20ZJ | 1IS0 | 3EZ7 | 2ZXY | 1A59 |
| 3SB1 | 1T3B | 1DP4 | 2FBI | 3TGW | 10RD | 1DXL | 3M44 | 2YQU | 3W6W |
| 2R11 | 4EU9 | 3GQF | 30RR | 2CWF | 1KM5 | 1I86 | 4B4P | 3AJY | 3E4F |
| 2I7N | 3U5S | 2E1Q | 3LZZ | 3B76 | 1VPZ | 1TZ9 | 10QC | 1UDA | 3KIZ |
| 3SG5 | 3IT2 | 1X04 | 30PC | 1HSS | 4B9D | 3LLX | 4KQW | 2G86 | 2EJA |
| 1J0C | 3H3L | 1RHC | 3ISZ | 1F3A | 1J0E | 3S53 | 3KKJ | 3I2I | 1M6N |
| 1JLX | 1S9C | 2Q6Q | 1HKU | 2RK4 | 3I51 | 1TMX | 1QMH | 1ZKQ | 1WL2 |
| 3CLK | 3HNZ | 2RGS | 1Y9W | 3NF2 | 2XTI | 1BH5 | 3DLR | 3FNB | 3LK0 |
| 3UR2 | 1UPI | 4FCJ | 3PQ1 | 2EH6 | 3CXZ | 2ZZT | 3F8M | 1QF5 | 3ENC |
| 3R6A | 3G8R | 2ZCG | 1TPU | 1TC5 | 3MGG | 3IC7 | 3L1G | 1NF8 | 3TP9 |
| 3CMR | 3TZI | 3F1C | 1B7B | 1VI6 | 2ED5 | 3TRC | 1CM9 | 1TDF | 3FAS |
| 1CGN | 4GPN | 3ZVH | 3ECY | 2Q3X | 1AWB | 3AXB | 3DAA | 30Z6 | 2IJI |
| 3IB8 | 3V0D | 2XLT | 1JC5 | 3MD7 | 2YV3 | 3MQ0 | 3DGO | 2AWA | 3QWU |

|      |      |      |      |      |      |      |      |      |      |
|------|------|------|------|------|------|------|------|------|------|
| 1TCD | 2DG8 | 3R0U | 3L09 | 3JU5 | 2OER | 3G2B | 3LN6 | 1JHZ | 3TQP |
| 1FHE | 2C7W | 1CM7 | 2PZ5 | 4E3R | 1LWI | 2NVV | 1WD8 | 3FU1 | 2C3Y |
| 2RAE | 3FWZ | 20X1 | 4GBU | 2Q6R | 2DSA | 3B46 | 3L2J | 3Q64 | 1VLS |
| 4EW7 | 2VK8 | 1PRE | 3DGQ | 2NVM | 1SQ5 | 3EE2 | 3MZ2 | 2B8W | 1GK6 |
| 2YY8 | 2W93 | 3FYB | 2XH1 | 3DYT | 10ZT | 1E7S | 4FMM | 2E5X | 1IHK |
| 3VVM | 1057 | 2ZCM | 30A0 | 3E7Q | 1QGD | 1Z0X | 3QSR | 2FZW | 4H17 |
| 3M3I | 3FGP | 3M3W | 1JM6 | 3GAY | 2C4I | 3AQT | 3DP9 | 20ZV | 3B47 |
| 3R03 | 30PB | 4E1N | 3Q2J | 4K25 | 1M54 | 2IJH | 3HCW | 3RIT | 1QYA |
| 4F6A | 1UC8 | 2VRZ | 3T61 | 3UBR | 1YNI | 2Y8H | 1GS3 | 3LM7 | 2HLJ |
| 3SMP | 1QLH | 1EVX | 3G22 | 1FBU | 2WK0 | 1I0H | 2IUT | 2Q9K | 4IXN |
| 4AS5 | 4K8F | 1ASK | 4DQ1 | 3THC | 2PN0 | 1IUG | 4E10 | 3TIV | 4G10 |
| 3RH9 | 1ETQ | 1OR6 | 4DZ8 | 2I0Q | 4G89 | 4HN0 | 3PMD | 1K86 | 2ZJX |
| 3LXX | 2SAM | 20N3 | 2UV2 | 2B5V | 3MZV | 3CJW | 4FP4 | 3EVJ | 4A5S |
| 4ERU | 3U13 | 1V71 | 3EFB | 1JB5 | 1XSR | 2Y5Y | 1K3R | 2PH1 | 3RHC |
| 2VEQ | 4G07 | 1SPQ | 1DJ3 | 1JQW | 2Y70 | 1XKJ | 1P0C | 3ORF | 3H51 |
| 3ICV | 1JUD | 2Q2F | 2YFB | 4F9K | 2FV7 | 1QAL | 30XA | 1DJU | 3UHZ |
| 3FDB | 2C5E | 4EG0 | 2GE3 | 4DJ4 | 1BET | 3SC4 | 3RD1 | 3D03 | 3SW1 |
| 2F1M | 2Z17 | 3IKV | 2QUF | 1LVE | 3LW3 | 4DSR | 2FYQ | 2PYW | 4ESB |
| 4EHS | 10RE | 1H0N | 2ZX3 | 1V43 | 3K2V | 1WX1 | 2YXZ | 3A05 | 3MEN |
| 3LYC | 1TYB | 2AJR | 3BXR | 4ETJ | 3GBX | 1HZW | 3T7D | 1L0S | 2T0D |
| 3EUQ | 2HB0 | 2I9Z | 2JK2 | 4ACD | 3ICT | 2C9H | 3KRV | 3MSH | 1BLC |
| 1HS0 | 3VCB | 2Q4N | 2UV0 | 4HPK | 2QBV | 3KZU | 1GVE | 2XBN | 2OYN |
| 3ZCG | 1Q0M | 2QH1 | 3ACA | 3KD2 | 2XYB | 1DJ0 | 4DL9 | 2FDE | 2QPV |
| 2EKB | 3FIU | 1VLL | 4EKY | 2HZ6 | 1ZV1 | 1JJK | 1R2R | 1GRC | 3QTA |
| 1GFS | 4TS1 | 30X9 | 3ERJ | 2Q5X | 2Q1E | 2QYM | 3THN | 2VEB | 1KH7 |
| 3DSB | 1LOQ | 3RMU | 4EG2 | 1Q7E | 1R6U | 3V67 | 2AMP | 1G1Y | 2ZEJ |
| 3S67 | 1PZS | 1ISM | 10ZU | 2J6R | 3QAN | 1TVV | 3CHV | 3LZK | 3MPG |
| 1TG8 | 2PMR | 2WU9 | 3UEI | 1UN8 | 2NRH | 4GQT | 2Y5D | 2FFC | 3AL6 |
| 3G3E | 2XYM | 2PNC | 4FN3 | 3QLJ | 1THT | 2HUM | 3CM4 | 1J3B | 3F7A |
| 3LXB | 1IA9 | 3U3X | 3QPT | 3KJX | 20Q0 | 3LL3 | 4DAD | 3SBX | 1N5T |
| 3E82 | 3DNK | 1CG3 | 1ALH | 3KYA | 4KUN | 3S0G | 1IVV | 3HJ6 | 3HM7 |
| 3RY8 | 30LP | 4E2A | 2DW7 | 3L79 | 3NJC | 3LE4 | 1FW1 | 2XLR | 3EET |
| 4GA4 | 1ECS | 3ZZM | 3T03 | 1XS0 | 3RMI | 20BY | 1V5Y | 2P62 | 3CSM |
| 2PFS | 1X03 | 3VQY | 30NP | 2VVT | 3CJD | 3DL3 | 2TPR | 2Y53 | 3FQ8 |
| 3UG9 | 3UW8 | 2VJ1 | 1WY5 | 3HJB | 2XSU | 1JHG | 4IGJ | 1GZD | 4GP1 |
| 2QH0 | 3TQJ | 3B97 | 2NVA | 3SF0 | 3L3P | 3QMS | 1NJ6 | 2QL3 | 1K94 |
| 1TSX | 4DF2 | 3U6W | 2CTS | 1EXT | 20QD | 1VBM | 2Z4X | 1KPC | 2P1R |
| 4DYK | 1YAA | 1SJ5 | 3PM7 | 1CZ7 | 2HNL | 3KF5 | 1SSG | 4F2P | 3LJL |
| 3KPH | 2VBG | 1UW7 | 4A00 | 1K0F | 1A4X | 2IIZ | 3QMW | 4J2Q | 1TW3 |
| 2W2K | 1WC6 | 1SY7 | 3MNL | 2A9U | 3R4Q | 3NRR | 3IX7 | 2PN1 | 2AAQ |
| 2HIN | 2A4K | 3ZJG | 4G7A | 3T0E | 1UTY | 3CYW | 1VEV | 1ETW | 3CBG |
| 3E3C | 3M5X | 4E03 | 3ZTA | 1YM3 | 2VVQ | 4F5G | 3JYN | 4A8E | 3FWY |
| 2V57 | 1EW2 | 3NU6 | 3KWP | 2P84 | 3LFR | 2CKJ | 2XDG | 1THE | 1VQC |
| 2BKW | 2I6R | 4F5K | 1K6S | 2BH7 | 201T | 1TY9 | 2ASH | 3G7V | 1NVT |
| 3EGJ | 2A9D | 2ZJT | 2EQ6 | 1J5P | 3LKV | 1D6J | 1B50 | 3EW0 | 1GVJ |
| 1E31 | 1FBS | 1VIX | 3GZP | 1MH0 | 3PCT | 3E4V | 3D0T | 3LMA | 3IWG |
| 3HRS | 1P5H | 1CQ3 | 4BJ1 | 2I0A | 2JDJ | 1P62 | 3ZGV | 1V1G | 10N0 |
| 3BLI | 2H0Q | 1V8Z | 20XL | 2VX0 | 2ZYG | 1IZM | 3VF5 | 2QNV | 4H2G |
| 2WYA | 1MYR | 1WC5 | 3H7L | 4F2N | 3QIK | 1CIV | 2HZK | 3NAD | 3R18 |
| 4F1E | 4A47 | 3N9X | 4JXU | 3HQX | 1M0Q | 1DZ3 | 2QG3 | 3FNS | 2W7Z |
| 1ZX2 | 1KU2 | 3VB2 | 4GFK | 2XX5 | 3MAD | 1AJM | 1YH8 | 2XDP | 2F1K |
| 2DB7 | 1XNF | 2DV1 | 2RIQ | 2B0R | 1U0M | 20EE | 1HUK | 2FD5 | 1MML |
| 3GWH | 2FLQ | 1LK9 | 3B5M | 1PS0 | 4A2U | 2XWC | 3US8 | 3I43 | 2EJZ |
| 3UJH | 1EK4 | 2R4I | 1NZR | 3DSL | 4GC4 | 3LVA | 2EQ5 | 3EX6 | 4GLL |
| 1IAT | 3C61 | 3FI0 | 1QHI | 1JXH | 3LUY | 3GC4 | 1PX7 | 1B0A | 3T1W |
| 3INV | 2RH0 | 3N4R | 1YJS | 1ZZT | 1H9G | 4LB8 | 3NAT | 3M7P | 30J7 |
| 1Y0U | 1SKV | 1QS4 | 3URN | 4KK2 | 1MT5 | 2VR6 | 4GLT | 4AEQ | 3LMU |
| 3DWJ | 3IIB | 1MV8 | 3F13 | 1ETK | 20WP | 1A71 | 1B5P | 3N05 | 1T8Q |
| 3N9T | 2APG | 1VHQ | 2AKC | 3T1X | 1XWM | 1S9I | 1YJ8 | 1S30 | 3IIU |
| 2X6H | 2IMS | 3K0S | 1F1M | 2FU4 | 3TG2 | 4G2T | 1UTH | 3UPS | 3K8R |

|      |      |      |      |      |      |      |      |      |      |
|------|------|------|------|------|------|------|------|------|------|
| 2PML | 2IE0 | 3RPE | 3F1V | 1XB4 | 4HVJ | 3UQZ | 2YAE | 2GP6 | 3E8S |
| 1G6W | 4HL6 | 4BR3 | 2XMS | 3GJZ | 2YWL | 1J6V | 20IK | 3HIM | 2GN0 |
| 1NS2 | 2R18 | 2CWV | 4AGT | 3HTI | 4F3A | 1XDS | 2R0T | 2G08 | 1Y9Q |
| 1TPB | 2D8E | 3C8N | 1KQP | 1LXE | 3S5T | 2XU6 | 4DKY | 2P6P | 1T9D |
| 3AQM | 1M4R | 2VMP | 1HQV | 106C | 1Y7M | 1YQC | 2X65 | 10BJ | 3U6G |
| 4ALB | 1C39 | 1P7N | 1TZ6 | 1XTM | 1ADU | 1UN9 | 3G1C | 2099 | 2JAS |
| 1AJ8 | 4ID7 | 1TDE | 1PDG | 3PF0 | 3R0S | 3TB4 | 3DM8 | 4DT5 | 1U5E |
| 1VH4 | 1IBH | 2QBU | 2VCQ | 3TK1 | 4HME | 3AP3 | 3CL4 | 3G0K | 2YAT |
| 2PH0 | 3R9U | 4AE8 | 1YDH | 2Q0X | 4K3Z | 2GN5 | 2XBU | 2YLZ | 2PVZ |
| 2ZA0 | 3ZYY | 1WVF | 1DK4 | 3LV2 | 4A9W | 1TGK | 3I0I | 3VP6 | 3NWT |
| 4JVU | 3MBL | 2HNE | 1TEX | 1EQB | 4GQV | 1KM3 | 3BHN | 1VHD | 3RPC |
| 1E6P | 3UNT | 1QX5 | 3L84 | 4GT7 | 3KT4 | 3JTZ | 2B0C | 3EEI | 3FZW |
| 3P9T | 1WLI | 2QNT | 3KYE | 1B3N | 4HJ2 | 3CXN | 3QWB | 3EA7 | 2YEU |
| 3L2K | 4L8E | 3FRK | 1AKA | 3DCM | 2Q12 | 3CXV | 3A4J | 3EE7 | 2Y6P |
| 3RFW | 3HGG | 10U5 | 3DEW | 2P19 | 3IGD | 3P2P | 2YYU | 3QAV | 30JI |
| 4L4X | 1NXZ | 3MDP | 3DDH | 3HC2 | 4H2I | 4AX2 | 1L0W | 2VD2 | 3SSI |
| 2RAF | 4FSC | 2ZHP | 2XB3 | 3P1T | 3DGZ | 3LZV | 4DQ8 | 1ZCU | 2XRH |
| 1WLT | 3VVL | 2X2U | 2YY9 | 3THA | 2FNP | 2FUV | 1M02 | 2GI3 | 3B57 |
| 1VJT | 1W6Q | 3R2P | 3EL9 | 2V54 | 1ZPS | 2DV7 | 2HJS | 3PQK | 3VZ3 |
| 2IW2 | 3QM4 | 1YMU | 1M2A | 2WUQ | 3UHU | 1IRJ | 3FC0 | 20VI | 4EPF |
| 4EW5 | 2UV4 | 1TRB | 1VL7 | 1Y92 | 3NI0 | 4FAK | 2V28 | 2QVF | 3AJW |
| 1PFR | 107L | 20PK | 4B16 | 3EWB | 2RAS | 1J32 | 1CW7 | 1N8F | 3LVM |
| 3FE3 | 3BS8 | 1QAP | 4EGE | 3B4D | 2GFV | 2W7R | 3CRJ | 3F8H | 3PPB |
| 1Z82 | 20EZ | 4KVH | 1CLI | 1JS3 | 1A4H | 3C3Y | 109P | 3Q2W | 1DT0 |
| 2YZM | 4HUT | 1Z1E | 1FZV | 1TPC | 3V1T | 2WE8 | 2XPU | 1F91 | 2W01 |
| 4IJN | 1ZXZ | 3HFD | 4AQJ | 3R38 | 3IJT | 2X40 | 3NRT | 3SJS | 30HS |
| 3GIE | 4ERR | 3VDG | 4I44 | 2VK1 | 2WSJ | 3AUY | 2WAG | 3QVQ | 1XDH |
| 1R9J | 3LPM | 3UJM | 3L6D | 3HYL | 1WPQ | 1HH1 | 1XFS | 2B7Z | 3Q2N |
| 1SM0 | 3D5P | 1YSB | 1KA2 | 1USP | 2ZM0 | 2WMD | 1P48 | 3NMD | 3Q74 |
| 4AKV | 2RDE | 3EK3 | 4FXR | 1KGZ | 3E77 | 2EFL | 3TAU | 3H77 | 3KH0 |
| 3NU8 | 3G1T | 3KEB | 1PD2 | 3A3F | 3ATP | 1WLC | 2QWV | 4KKQ | 3LRC |
| 3MYF | 4ICT | 3LL9 | 2W7W | 2BWJ | 3CCK | 1PX6 | 1ZY5 | 4I8A | 1TC1 |
| 4G19 | 3GWL | 3W2Z | 3GY0 | 3LOY | 3UYY | 4L5P | 4AFM | 3DJB | 3F0U |
| 2DC1 | 1KVT | 200R | 4AIH | 3TLE | 3KB2 | 2YBX | 3NA3 | 2072 | 3V8H |
| 3SMA | 3G02 | 1U73 | 1MPU | 2G0K | 1VZA | 4B50 | 2HE5 | 1KJN | 3SLC |
| 2CFR | 3SSJ | 3LFH | 1VKG | 1K6D | 3E0Q | 3QH8 | 3PIJ | 1WLE | 1H4F |
| 20DA | 2TSC | 3CI6 | 2QZ9 | 3M3V | 3ETJ | 1VHV | 3MHE | 2AZK | 3FC5 |
| 1YI8 | 4H1S | 2VMT | 2FFS | 2VLD | 1U0E | 1S7Z | 3C0Y | 3QMQ | 3IA1 |
| 1QB2 | 3R5K | 103U | 20FY | 4AE4 | 3H0Y | 3GWE | 2E4N | 3E8X | 1HUJ |
| 2CWW | 1AIH | 204N | 2Z98 | 3PGQ | 3UYV | 1BJN | 2ZDY | 4GLW | 10EP |
| 3BJV | 3ZFI | 1SNY | 3V1V | 3UKT | 1WD6 | 4FXP | 1BIU | 4E1R | 1E5Z |
| 4B4Y | 3ZX0 | 2DTC | 30BH | 4DN1 | 1KLY | 3GTH | 30SV | 3CLH | 2Q20 |
| 1NJH | 3FHJ | 1R66 | 2QJ4 | 1R5A | 3I24 | 2FXD | 2VCV | 1D7K | 4DA5 |
| 3S5S | 3T8U | 2IK6 | 3SXZ | 3QZY | 3BFI | 4ASG | 4MK4 | 2DVK | 6GSV |
| 10NF | 3DL5 | 2HH9 | 4EWG | 4EDY | 3JSA | 2Y6Z | 3QUV | 4AK7 | 3V4S |
| 3GEL | 4KQX | 1FEA | 2I0M | 1B67 | 4A2C | 3CTW | 3D1C | 3M1L | 3APY |
| 3ISO | 1BHL | 2PWN | 3LLD | 3PNH | 1XPK | 3NSK | 106T | 1J79 | 2IGQ |
| 4A1I | 2JAX | 1FEW | 4B1F | 2G3A | 2EJN | 3FFR | 1D0S | 3LY8 | 3P4E |
| 1KNY | 2ISN | 2IK0 | 2J3J | 3HZ0 | 3HAI | 3VQD | 10AH | 4ASI | 1VR7 |
| 1CQS | 3PI2 | 1U3Z | 3RU0 | 2Z6J | 30F4 | 3U6U | 3AB8 | 3KKG | 4IS0 |
| 1S08 | 1LXD | 2EFK | 1DTY | 3098 | 3QSG | 2Q01 | 1Q8B | 4JZ7 | 4G3W |
| 1HXP | 2G8D | 3LK5 | 3HUH | 1WST | 309S | 1SH8 | 1R1U | 20AI | 2VUG |
| 2NYC | 4JHC | 2DBS | 1TSM | 3HZP | 3NFT | 3RQB | 3EEA | 2PVQ | 2I87 |
| 1SIP | 2IOG | 1P1C | 3MSU | 4L82 | 2QH7 | 20SD | 2PIJ | 1ZCV | 1FWZ |
| 3NKL | 2XF4 | 2RIP | 3H95 | 2QT8 | 202D | 2X5C | 3IV7 | 2ZGU | 4GMF |
| 1SHN | 3K0T | 3UT2 | 2RF7 | 3V6G | 3BCM | 2GK4 | 1UC9 | 1D4S | 3HZ4 |
| 2EJ8 | 4IJ6 | 3LPN | 3G8L | 1BWR | 4EB9 | 4F4D | 1Y3T | 3QZX | 2PW6 |
| 2P1A | 1VBN | 2C1U | 2Y7I | 300Y | 1WTD | 3LHQ | 304V | 2W7F | 3MLF |
| 3USS | 1FPS | 4B0I | 1ERE | 1YG2 | 4DI0 | 4IPJ | 3CEI | 2F22 | 2DXU |
| 2B06 | 2I7G | 2YZI | 3M0Z | 3M7I | 3MVP | 4AZB | 2E2T | 1U20 | 3FRC |

|      |      |      |      |      |      |      |      |      |      |
|------|------|------|------|------|------|------|------|------|------|
| 3KMI | 4GLB | 1J0H | 2P67 | 3QF0 | 4GDT | 4A26 | 20R3 | 2V30 | 4I15 |
| 2YVY | 3I2H | 20E1 | 1RQI | 1XPL | 10BL | 3ACB | 3T0J | 3QP1 | 1VZG |
| 3EUP | 4E6H | 1KM2 | 2PBW | 2I71 | 1AMH | 1M3E | 3HAF | 1WCV | 1EV5 |
| 1DLE | 2C3D | 3CLV | 2YVE | 2XX3 | 2X7Z | 3A5Y | 2I80 | 3I44 | 3HAH |
| 3GC6 | 1BBH | 3D3J | 2AAW | 2XH2 | 2H39 | 1T0G | 3VW9 | 4FYK | 1J0R |
| 2G7S | 3G2P | 3H4Y | 2GT2 | 2RKH | 1JEH | 2C8U | 3UFN | 2CJE | 2CFB |
| 1DJ8 | 3MEY | 3YPI | 1B57 | 30VR | 2F1R | 1U7I | 3R0Q | 20IP | 2W11 |
| 3F4C | 3KQ5 | 3L2I | 1LQL | 3V9M | 3I0Z | 1A9M | 1WIW | 1BIQ | 4J6E |
| 3NZR | 3C05 | 2IKB | 2H9U | 1QWJ | 20NF | 4I8Q | 2IMJ | 1PB0 | 3MIZ |
| 1XZW | 3MTQ | 1HRH | 5FIV | 3Q4G | 2HYD | 3UEG | 4F5M | 4IWN | 2ALM |
| 4I0K | 3JW2 | 3KUZ | 2XKL | 4B1B | 2PA7 | 3EZU | 1LQP | 4JGA | 3AAJ |
| 1EFH | 2X8U | 3D20 | 3B81 | 1HZ4 | 2A9S | 1PL5 | 3H3Z | 1MX0 | 2JID |
| 3TD4 | 2PIN | 4E16 | 1EKF | 2ZGW | 4B8X | 3M52 | 4HTF | 2QTI | 2F3X |
| 1WY0 | 1EH9 | 4JB7 | 3MEL | 1CBF | 3TB2 | 4AVP | 2FXQ | 3M9Z | 3CWX |
| 1W53 | 3KF3 | 1Q8M | 1D7D | 3TSY | 2C4J | 3R04 | 3KVU | 3DCF | 4FK1 |
| 1V08 | 2F4P | 1GFZ | 3APN | 3N6F | 3HUU | 2PAE | 2G0J | 2F5J | 1Z0P |
| 1HXQ | 1YR9 | 1U4R | 2BV6 | 2GT4 | 2IAI | 3P3I | 2X50 | 1MZJ | 4I1Y |
| 1D2F | 3UGI | 2DP9 | 2PL5 | 1VCI | 4FRZ | 3VHR | 4G2M | 3IH0 | 1MZV |
| 200L | 2RL3 | 3PGB | 1CCD | 2HDH | 1DCF | 3U2A | 3FD5 | 3RBX | 2NWG |
| 3TS7 | 2I33 | 3BA3 | 4AK9 | 3UD0 | 2BAY | 1ERW | 3P2Y | 3GR0 | 3AI9 |
| 3RHT | 3NEM | 1X70 | 3S64 | 1M0U | 105L | 3CZP | 3T22 | 1R8B | 4F0L |
| 1ELX | 4G06 | 4FTW | 4DQF | 2EBD | 3JV9 | 1TXG | 3GU3 | 1U12 | 3KM0 |
| 20U6 | 2BYL | 2ADP | 1H6V | 3C8J | 3RPP | 4ASL | 4G0L | 3HGX | 3BN7 |
| 1MY7 | 1WKZ | 4EM8 | 1Y06 | 3FG9 | 3ZWF | 4JCI | 1TXZ | 3BHQ | 1RIY |
| 2BEK | 3F0H | 3M5U | 2AYQ | 2Z6F | 4F66 | 3CU2 | 1Z02 | 3PPE | 2P5F |
| 2W0R | 4IJ5 | 2ES0 | 1B6S | 4F5L | 1XFC | 1NY5 | 3HX9 | 3UEY | 4IT1 |
| 3CJN | 3OI7 | 1HJ6 | 3GDI | 3BGX | 1QQ6 | 1Z8D | 2R2C | 1HKQ | 4E5P |
| 10PR | 1PBF | 2J2F | 2ZCX | 2WP4 | 3KXK | 1DVI | 2G8Y | 2EGY | 3BL6 |
| 3B60 | 2WK4 | 1B8G | 1HTA | 3DH9 | 3K96 | 3BCW | 2JGV | 1SEI | 1A15 |
| 200I | 2X0S | 2V42 | 2FN0 | 4JQZ | 3KCQ | 3GU2 | 1QUP | 1WDZ | 1V1Q |
| 3DLX | 2GED | 2YR2 | 2IW4 | 1R7L | 2008 | 3KDC | 2X5F | 4HI3 | 3K8E |
| 3M0I | 3U7A | 2YCS | 3HQ8 | 3T9V | 4AMV | 1I4S | 1ZP7 | 3STX | 2H53 |
| 1CHW | 4EZG | 3K3P | 3TFX | 1G5H | 2WSQ | 2E5F | 2QVC | 3N9I | 1E0V |
| 1YFW | 10H0 | 3LIQ | 3KA0 | 2GXS | 2QHQ | 1HJK | 2Z85 | 1WKH | 3FMI |
| 1J31 | 1T0X | 3U0B | 3GR9 | 1BWD | 20VG | 3T90 | 1B4P | 2RK6 | 1V5V |
| 2NQZ | 2DBR | 3IPR | 3NR7 | 1N49 | 3E3M | 4ITB | 1CI0 | 2J85 | 1JBQ |
| 3TQD | 3Q84 | 1JVL | 1I14 | 10JT | 3T4E | 3CBX | 2JJ8 | 2XMT | 2F8M |
| 3MNG | 30B4 | 1ZNP | 1TLG | 1T98 | 3E10 | 3NF6 | 4DJN | 3DU4 | 4HRW |
| 4G2D | 3IV3 | 3L7W | 3IR3 | 2ZVX | 3G5L | 3FNV | 1BMP | 1YPI | 4KEM |
| 2GD9 | 3EXZ | 10DW | 1FZR | 1HVY | 1FJH | 2F9T | 4L3R | 3MK6 | 3ZQ5 |
| 3Q1Y | 3F71 | 1US1 | 3SXM | 2FX0 | 2R1U | 20D0 | 3Q4S | 2XCK | 3BW2 |
| 30S8 | 1ISA | 1H7H | 2BMI | 4G1K | 2IES | 3MUX | 2WWI | 1HGX | 2AEV |
| 4N0S | 1KJX | 1Y7R | 4FKZ | 3DAL | 3V0L | 2IKK | 2DDH | 3DR4 | 2CYB |
| 2I6H | 1VBH | 2Q5I | 3A5S | 3H07 | 2J6Y | 2GX5 | 2HUU | 3RFB | 2DPN |
| 1F1D | 3I54 | 2CME | 4HFJ | 2QSI | 3A14 | 3MJM | 2J6Z | 2H2R | 3LLF |
| 2Z2B | 2J1P | 4FQ0 | 1WGC | 2AKZ | 3I2F | 203K | 4EUD | 1KEP | 3BM2 |
| 1IJI | 3GHF | 4HX7 | 3ELE | 3KBY | 3MS5 | 100E | 2XR4 | 1RSR | 3RQI |
| 4A1N | 1WU9 | 4I9B | 3EIP | 3NVO | 4DZW | 3E7G | 3TZL | 3CZ9 | 3HNW |
| 2QNU | 2AVT | 1ZXK | 2DFU | 2XWN | 4B17 | 2QNJ | 3QG0 | 1HEI | 2DPF |
| 2PSG | 2CCK | 4F5I | 1MVP | 2CIN | 4L0Q | 1VCE | 3D57 | 3B36 | 3D45 |
| 1DMQ | 1YGP | 3SE7 | 1CD0 | 2P8I | 4ECJ | 1NFZ | 20I8 | 3BAT | 1GLL |
| 2R5P | 3B38 | 6GSU | 10DX | 1DLI | 2V9Y | 2DPG | 1L5Y | 4E04 | 2BHK |
| 2ATS | 4A0M | 3DC1 | 3IC6 | 2HK2 | 3F8X | 1ZVL | 2A6B | 2B9D | 3EC6 |
| 308J | 1PE0 | 1Q1E | 1SZZ | 3U9X | 3E04 | 1XUQ | 3BWC | 4IAR | 1A0G |
| 205H | 4HEB | 2QSW | 1YR0 | 2CN4 | 2RJH | 2X2A | 1WPN | 3DVI | 3SMS |
| 1SET | 4APV | 1GLQ | 3S70 | 3IB5 | 1G5C | 4EC0 | 2W0J | 1WW1 | 3HIU |
| 2JKV | 4E5M | 2RGU | 3G1L | 20TA | 1AID | 3HBA | 1F4M | 3MTI | 1RW4 |
| 1Y0A | 2HAY | 4I01 | 2Q7V | 1PQU | 1ZN3 | 3S6D | 2QR5 | 2W2L | 1SZQ |
| 2VF7 | 2G6L | 2JEE | 2A9F | 1ST0 | 3FR7 | 4GYS | 3C3M | 2Y79 | 4B9E |
| 1R3S | 3LY1 | 30ML | 2F0N | 3B1F | 2YXN | 3KCC | 2FUR | 1YIB | 1HLM |

|      |      |      |      |      |      |      |      |      |      |
|------|------|------|------|------|------|------|------|------|------|
| 3QTD | 30QP | 3RKC | 3RLU | 3VEM | 1C3G | 3TQG | 10UL | 4EGB | 3C9E |
| 3M5Z | 1UT4 | 2WNS | 1FP3 | 1K20 | 3S4D | 4F32 | 3F60 | 1D3Y | 3FFL |
| 3V8L | 1R65 | 3GUZ | 4F31 | 3TW2 | 1T4B | 2GJ4 | 2FZT | 4HJ1 | 1XVV |
| 2Y7R | 3LNS | 3PUT | 3S8C | 1TLJ | 2PZ0 | 3BDH | 1M6E | 2IWQ | 2WGW |
| 1ZJJ | 1TV8 | 3SLZ | 4MT2 | 3V7C | 20P5 | 3PZS | 3B5T | 1JQC | 3HR0 |
| 3BXP | 2QWW | 3HME | 4MDH | 3N46 | 3RU6 | 1JLK | 3V4C | 1VQJ | 1I4M |
| 3BM6 | 10R0 | 1UTG | 3G8G | 3PJY | 300T | 2V5B | 2ZMA | 3CQ9 | 1ZVP |
| 1R3N | 2QA2 | 3G25 | 2EB1 | 2XMH | 3G26 | 70DC | 3Q6I | 1E3I | 3ICF |
| 4GEM | 2DV3 | 3UHN | 2APS | 3E22 | 1X08 | 4J0N | 1DZT | 1J5W | 1KUT |
| 1K8F | 4FCX | 3ZXC | 3PC4 | 1M7V | 3AX6 | 3E1H | 20Q2 | 1CBG | 1JMG |
| 3MUQ | 1MJT | 2Z54 | 1K88 | 3CL5 | 3K5H | 2INR | 1R4W | 2QC2 | 2D36 |
| 2FBL | 4JBD | 1ZHG | 2Z76 | 3BB8 | 2AZQ | 1KYW | 2053 | 3QGZ | 3DED |
| 1H69 | 1Y6E | 3HMQ | 3CM2 | 2AWD | 4FUN | 2ZG0 | 3I9X | 1UWH | 1BTK |
| 3MGJ | 2BML | 2IBP | 3TYS | 2J0F | 2VP8 | 1EQT | 3ES1 | 1GXL | 3BM4 |
| 1G98 | 1XCA | 2ZSK | 1ZCH | 3FFU | 3SC3 | 3U04 | 2CIJ | 1K2F | 3K7Y |
| 3FGY | 3FC2 | 2ESS | 2YX9 | 3DVH | 2YHN | 3LRQ | 3TSM | 2PFB | 3GI0 |
| 3G9G | 3EYY | 1GL3 | 1FI4 | 3M1Z | 3IJ0 | 3LQS | 1EX2 | 1JG0 | 2W21 |
| 2A8F | 2XL9 | 3ZYC | 2E00 | 3S0Y | 1G57 | 3NK1 | 1PJ0 | 3ER7 | 4A3N |
| 3QTP | 2Z61 | 1RKT | 2Q2R | 2FB2 | 1EJE | 3L8D | 3NKH | 3K79 | 2XLS |
| 2D6Y | 2PK7 | 2BX7 | 2FZF | 4KC0 | 3LZW | 4A22 | 3F4N | 2JCS | 1TWD |
| 2ZVI | 2GDZ | 3TG9 | 3N38 | 3T2U | 1Z9M | 3PC6 | 1GPU | 2WQF | 3TLY |
| 3N2M | 1R7J | 2PEY | 4FBK | 1P6J | 1Z2I | 1PRH | 3H3M | 2QTM | 3K6K |
| 3I05 | 1A37 | 1AR0 | 2EGD | 2RDP | 1N1E | 1Z72 | 2XPE | 1RZ0 | 30B6 |
| 3LT8 | 1UTX | 3B0R | 2ZUK | 2Z10 | 3GAZ | 3G7S | 4JWQ | 4HE4 | 2JAE |
| 1UWL | 2JG2 | 1LY1 | 1NR9 | 3LWD | 10TK | 3E7M | 3CNK | 30JE | 1I3L |
| 3FH0 | 1KZK | 3RTY | 3E9M | 10GZ | 3PM6 | 2Q3B | 2J6H | 2I0J | 2QCI |
| 1MKH | 1M0D | 3NM6 | 2YCR | 4IX0 | 1E9P | 1FKK | 3TZT | 1K0C | 2IXH |
| 2PKF | 4GEL | 3VPM | 1C1D | 1TC2 | 3I1K | 2Y5S | 2YHE | 3TN4 | 1VI9 |
| 2YN4 | 2F9H | 1DLJ | 1XS0 | 2WGE | 1RNE | 3VS8 | 4B28 | 1DJN | 2PKE |
| 1DIG | 1L1R | 4GMG | 3VMK | 4GLI | 3RMW | 2YHW | 3PM9 | 3LYD | 3L9F |
| 3KC2 | 20GY | 4EHI | 30P1 | 3AW1 | 1BGW | 1UMV | 2F8H | 1E3L | 2X44 |
| 2WWU | 3N16 | 1X77 | 3GDM | 3BXS | 2VKV | 2HKZ | 2PZR | 1NJC | 3HS3 |
| 4LFG | 1VHX | 3QWE | 2GST | 4E0V | 3P8R | 3P7I | 2E83 | 3BW3 | 3R13 |
| 2B03 | 4H7P | 3SIY | 1GC3 | 1EE2 | 1MZH | 3Q2L | 3MWM | 2Q5H | 2HU7 |
| 3L1M | 1YDV | 1CI4 | 3N8D | 2X30 | 4FUV | 3CXX | 2P4Q | 2EV9 | 3E60 |
| 3M16 | 3LLS | 3BKW | 3P0T | 1U67 | 2X1J | 3QP8 | 3JYU | 1N31 | 1YPO |
| 1US0 | 3VYM | 3JZ3 | 3HCP | 1JIL | 2Q2L | 2Z28 | 4AT0 | 2WRA | 2FT0 |
| 3N3Z | 3LTV | 2FJ2 | 4KSY | 1KM1 | 3UBM | 2DSD | 2W8V | 1JLV | 1MJH |
| 3Q5W | 3AGX | 2HPV | 1SJI | 20YZ | 3Q00 | 10SY | 1YTA | 4DNN | 2Z46 |
| 2X3V | 1G5T | 3AVQ | 1AZ5 | 1N8T | 2GVL | 3I9K | 3P1V | 2E4Z | 3F14 |
| 3EY7 | 3CQ6 | 2C2X | 3FV6 | 3PL2 | 30HU | 3EDD | 3FHX | 3ITQ | 3EWN |
| 3R0Y | 4LC6 | 4A6G | 2GBU | 4E4T | 2NT0 | 1Q9U | 2H0Q | 3T7M | 1VDC |
| 2R52 | 1EXS | 2HH6 | 3EY8 | 3QKC | 2VXN | 2HSB | 2XGG | 1I69 | 4FR2 |
| 3I38 | 1JA3 | 4EXN | 3ZBV | 3GZ7 | 1H60 | 3NVA | 2WAP | 1XW8 | 2DY3 |
| 4AAM | 1VQA | 3E03 | 3ZS7 | 1A6P | 2VNS | 1GQA | 3A74 | 1IBD | 4J15 |
| 3AIG | 3ES4 | 3C48 | 3TX8 | 3G0T | 3I6U | 2A3N | 2JFQ | 3NYJ | 3E2D |
| 3CHI | 1E5M | 4I0H | 3ISH | 3EEG | 2WT9 | 1JU0 | 3BV0 | 1VS3 | 4HX6 |
| 3G7R | 3AWJ | 1XML | 2R14 | 3ZLM | 1WZ3 | 1EEQ | 2Z6C | 3GGU | 2P82 |
| 3RJW | 1V96 | 1CTE | 2P08 | 4AFL | 1NJJ | 1S9J | 1MK4 | 1SHJ | 1GMP |
| 4APY | 1EN4 | 3RD7 | 3LY9 | 3UT8 | 3BNV | 3LMZ | 1SQE | 301W | 2ZSJ |
| 4AN6 | 3NSL | 2PW0 | 3GHJ | 1VPA | 1A8L | 2WGL | 3LHX | 1B76 | 3ZZ4 |
| 1T09 | 3N2Y | 3DM7 | 200J | 3QMV | 1HNB | 4DY1 | 2I7S | 1VAF | 1ZM7 |
| 3HWL | 3F4W | 1UCR | 2W1R | 3GTI | 3AD0 | 2N07 | 1QQ2 | 5GRT | 3D0R |
| 1G8S | 3S2R | 1USC | 3QXB | 3DAQ | 4AJ3 | 1FBQ | 1HDY | 2C1L | 3IBP |
| 4IQI | 3DMY | 2JCG | 4I8P | 3FVQ | 1RLU | 4J9X | 2JK1 | 4F5F | 2CCG |
| 3HAC | 1R3R | 1H8X | 2NS9 | 1E5X | 3M1U | 2P6L | 1ID4 | 3FFH | 2IKS |
| 2F10 | 1JGT | 1AZV | 2J67 | 2HR0 | 2DI3 | 1CD8 | 2RHJ | 1P1V | 3IL7 |
| 2WM1 | 1PVD | 1J0G | 1GT0 | 2ZZ3 | 2DW0 | 3FU8 | 3GYD | 1RFY | 2ZB9 |
| 3Q0E | 1089 | 2H9V | 1Y67 | 3HD0 | 2XCH | 4ESW | 1CNZ | 3UHS | 1IEF |
| 1H2N | 3M30 | 2QTE | 1T04 | 3EA0 | 1R5K | 2D1H | 3DPJ | 20FW | 1E7R |

|      |      |      |      |      |      |       |      |      |      |
|------|------|------|------|------|------|-------|------|------|------|
| 3RZA | 2WAH | 2VSD | 3KT0 | 1KTC | 3R23 | 1AQY  | 1JWJ | 2QTT | 3ZZW |
| 1VR0 | 3VQL | 2E3T | 3PWG | 1V4V | 3Q91 | 4BJR  | 304I | 3ABI | 3MAU |
| 4AJF | 4EQS | 4JKZ | 3QU1 | 2WYQ | 2XLP | 2F42  | 3F9F | 1IAX | 3HSR |
| 1LGQ | 4GMD | 3B42 | 3NOQ | 3KK6 | 2A87 | 1TPW  | 20ZH | 6ICD | 1R3W |
| 3EUC | 1K9P | 3GUV | 1RRG | 1R6Y | 1VG4 | 3K3U  | 2GRZ | 300D | 2P03 |
| 2JJC | 4EQR | 1FC1 | 3AFC | 4DZH | 2J5V | 1H8Y  | 2R9Z | 3HP1 | 2A35 |
| 1Y42 | 3ABH | 3DJG | 3LWB | 1KIJ | 2FDD | 2A2Z  | 3VWX | 1KD0 | 4EX0 |
| 3VM9 | 1AWD | 4EUN | 1AJ5 | 2I4D | 2R8Q | 3DYD  | 1MD3 | 1B9H | 3JTW |
| 3UH7 | 2I7R | 4H3C | 2IPB | 10BP | 1SEJ | 1BYS  | 2AB2 | 3F47 | 1WU7 |
| 2I0X | 10JW | 3S5D | 3MZ1 | 1XJK | 3LSN | 3MR7  | 1UI7 | 3C7I | 2ANH |
| 2BKA | 3EZ0 | 2Z26 | 3FQA | 1JUJ | 3VPN | 1J3M  | 2R6Z | 201X | 1CZB |
| 1YDY | 3FH1 | 3MAK | 3HRI | 3Q10 | 2NYG | 2G9Z  | 2FGV | 1YHA | 3C3K |
| 2Q7X | 3F3H | 1PFQ | 1TXY | 3AXA | 2DY0 | 1QY4  | 3CT6 | 3TK0 | 1T6L |
| 1YUX | 30HN | 1RQL | 4F1Y | 1AX1 | 4E0G | 1L6R  | 1HY0 | 1C7H | 2DQW |
| 1EMF | 3073 | 1FDV | 4A0V | 3CU0 | 2BK4 | 4DP0  | 4AQN | 20UX | 1EG5 |
| 3G16 | 3M0L | 3LLL | 1QH3 | 1H3U | 3R5G | 3M0G  | 3CDC | 1IEC | 2QA5 |
| 3OKS | 4DBD | 3S23 | 4FX9 | 3FA5 | 1Y97 | 4FWL  | 4HES | 3UR5 | 1UNA |
| 4EQQ | 3TJ8 | 1F6D | 2QX0 | 3N4X | 3GU1 | 4KN5  | 3M0F | 1XRE | 3LCE |
| 1RKA | 1W4N | 1W07 | 4GUF | 4AIB | 1H4T | 3EIB  | 3NUZ | 1K66 | 2EMQ |
| 2UXW | 1K68 | 4FYR | 2IWF | 1KH9 | 1050 | 4HZP  | 1R30 | 1XHY | 30JG |
| 2W3Q | 3BQT | 3QQD | 3RIM | 2GC3 | 1R1T | 1IYZ  | 1KCF | 1N26 | 1ZGJ |
| 2VGV | 4GMK | 4DGS | 3HZU | 2ZH0 | 2ABQ | 2GY Y | 1CHM | 2FVU | 2E8C |
| 3B0Q | 3LUZ | 1DUG | 3HLX | 1T33 | 3NYU | 3HZR  | 3RD3 | 3HEM | 2ZBB |
| 2ACX | 1VG7 | 3LL6 | 2Y08 | 1A4I | 3NYM | 4H2B  | 4JBB | 2Z8H | 4AXD |
| 2IA1 | 2HJ0 | 3K21 | 1AFR | 3S5Z | 2WEA | 3QNC  | 1P65 | 3CAM | 3HWR |
| 1UDC | 2I1A | 2C05 | 3L8A | 3D40 | 3HF5 | 2X0I  | 3GA1 | 1HKW | 3HHF |
| 30TL | 3TYX | 1A4B | 10HQ | 3CRU | 1ZZQ | 2C20  | 2Q2H | 3T7Y | 1R6T |
| 1S5K | 1IJL | 1J1I | 3PP9 | 2EL2 | 2Z0J | 2WW0  | 1TVD | 3I3W | 3PJL |
| 2W2F | 1GC8 | 2GH1 | 2X5T | 1UER | 1B04 | 3RJT  | 4BCA | 3URB | 1TKA |
| 3LIS | 30XN | 1M9R | 3P9V | 2JA9 | 2Q00 | 4K8W  | 3QT8 | 1WD9 | 3DBI |
| 2QU7 | 1RV8 | 1GD7 | 4BC6 | 3C6M | 4F82 | 1C7N  | 4F62 | 2HD0 | 3EDN |
| 4E85 | 2HJH | 1YQ7 | 2BZ4 | 3AEZ | 3RB7 | 3U7J  | 2FFG | 2GPU | 1ASB |
| 3JQR | 3LF6 | 3NH4 | 3M8J | 1DHT | 2Z5F | 2JAT  | 1TIS | 1YLQ | 4AWQ |
| 2P5Q | 1KBZ | 2XVH | 2RB7 | 3V7M | 4AMT | 2AB5  | 1CZ9 | 3GFL | 4EPS |
| 1YPQ | 1G2Q | 3S19 | 1W0V | 20CZ | 4K8D | 3I0Y  | 3K9C | 3SZJ | 2QL1 |
| 3KM4 | 4JAT | 2W7M | 4I0T | 3ED4 | 1YLM | 3B1R  | 3DTJ | 4FBL | 4IR7 |
| 301X | 2WUZ | 2CW2 | 1X87 | 3HG9 | 2E11 | 3TFW  | 1AUC | 2YCI | 3APZ |
| 1J55 | 3ULX | 1Y23 | 1U3W | 1BGQ | 3G60 | 2Z0W  | 2AA4 | 2WBG | 2EWT |
| 1QQJ | 1U0U | 2HUN | 1J7N | 3C0M | 1EW3 | 3K9U  | 1JEZ | 3M43 | 2CST |
| 3CYF | 3U21 | 2DAP | 1ELY | 3P61 | 1PS7 | 3SM3  | 3BR0 | 2E18 | 1GH7 |
| 1TSD | 3NY5 | 2YG0 | 3SZA | 2G30 | 3NIV | 3C4T  | 3RZP | 2WBA | 8PRK |
| 3K4H | 3UYU | 1TLK | 3LST | 1R3Y | 300P | 2XK9  | 1BYL | 1B01 | 1SQI |
| 10Q4 | 3T9P | 4AG7 | 2GUG | 2YRI | 3DL6 | 3F6A  | 10KJ | 3I6W | 2YY5 |
| 3VL2 | 3ZQV | 4INA | 3OSC | 20GU | 3TP0 | 3FJY  | 1D0V | 1P5T | 3EYW |
| 3G15 | 4DQZ | 1FIE | 1N0X | 3G8M | 1MTC | 2IG6  | 3AMF | 4IPI | 3NNL |
| 1X8X | 1DFX | 3UAF | 4AU1 | 1V8T | 2NYS | 2CDU  | 1GNE | 1E97 | 2I7P |
| 1VIA | 3NR9 | 2E2P | 2GFY | 4A6B | 2D0U | 1WYX  | 2IJD | 4AQP | 1HW3 |
| 2Q24 | 2PPV | 2YK5 | 4JHR | 3KAE | 2J6G | 4DI0  | 3G14 | 1CW4 | 3F8G |
| 3I0P | 3TQK | 1LKZ | 1B3D | 4H9T | 3S91 | 3EKT  | 2Y5I | 3CTZ | 3S7Z |
| 3H65 | 20V9 | 3M2P | 4ATY | 3PBW | 1UXM | 4IC3  | 20EM | 1E9F | 300L |
| 2W2A | 3QSB | 2QNI | 3N4P | 3DXW | 4E5S | 2CFY  | 2B2C | 3P60 | 2NV4 |
| 3EGY | 3H36 | 3I6A | 2H0X | 1N2F | 4E5Y | 3RLZ  | 4F8D | 2Q1U | 1I21 |
| 3BYR | 1KCM | 1CI7 | 3D05 | 3S2Q | 4HAI | 3QK7  | 2Q09 | 4I06 | 1IX7 |
| 2I5D | 3GRN | 1VIQ | 4GT1 | 3FM5 | 3HFY | 4IMP  | 2BTI | 3T8T | 4HL9 |
| 3EW2 | 1CHU | 204T | 2F7K | 1G2W | 3QMT | 30M0  | 3CP6 | 4J7K | 2QHK |
| 1UIS | 20LM | 3E2S | 2V0X | 2D4W | 2DRV | 3D0J  | 2PIH | 1USB | 2D1C |
| 2FL4 | 3KW2 | 1J3R | 4E9K | 20AC | 209C | 3TNG  | 4JJP | 1CU1 | 2RIU |
| 3FMW | 3LYH | 3W5I | 3QKX | 1M75 | 4IKH | 20Z6  | 3ND1 | 3NQ5 | 4F2V |
| 1TFZ | 2GPY | 3NUT | 1JIE | 1WW6 | 2Z0V | 4EAE  | 3ROT | 1AQE | 3KAW |
| 3NWX | 3OWF | 2CGA | 4E43 | 3NHX | 1W61 | 3CTV  | 2W40 | 10RU | 301Z |

|      |      |      |      |      |      |      |      |      |      |
|------|------|------|------|------|------|------|------|------|------|
| 3IQM | 4IA5 | 3H50 | 3C26 | 2EKL | 1A27 | 204L | 1R3V | 1WKQ | 2Q2J |
| 2E7F | 1SQS | 3VTS | 1FN9 | 3PAJ | 4BD7 | 2PFI | 1YEM | 2AEX | 3TNZ |
| 1QP8 | 2DV2 | 2CUN | 2XJ7 | 4F0Y | 2I6L | 2FHQ | 1JQX | 3SSX | 20K7 |
| 3AAT | 2CW3 | 1BKJ | 1ULK | 4I19 | 3LRD | 3LND | 1UQ4 | 3F7S | 2X64 |
| 1G7W | 3BVQ | 3CEH | 1QC0 | 3S4J | 10KI | 1M0S | 3PUH | 1E6U | 1SJ2 |
| 4AE1 | 4A03 | 3RKY | 3QNI | 3EPW | 2F96 | 3KDK | 1M2B | 1S4K | 3UT4 |
| 4DMB | 1C8U | 1Z5N | 3CP0 | 3B7H | 3PU7 | 3H40 | 2EEP | 4HI7 | 3G46 |
| 1EPA | 1U0W | 1MFT | 3CDY | 4A35 | 2HXW | 3UYI | 20Z2 | 1KL2 | 1AHE |
| 1QKS | 2XEU | 4ECL | 2IY0 | 1HN4 | 1A0G | 3EUT | 2RGI | 3LJB | 2CAQ |
| 2EMU | 3LZC | 2DXT | 3FPK | 1BG5 | 2X5G | 3K06 | 1YUZ | 1QFE | 4J7P |
| 4B0T | 2DR1 | 2RGY | 2D2D | 3BEU | 3KU7 | 3B5I | 4K2H | 2AW5 | 3CL1 |
| 2AL2 | 3P13 | 1HJ3 | 3V95 | 20Y9 | 2J68 | 3N0Y | 2PW9 | 2YCD | 4J5P |
| 3H07 | 2N04 | 200D | 4HA0 | 4BC9 | 20WQ | 4E80 | 3GW2 | 3PD4 | 4F5J |
| 1QHM | 3I17 | 2ZZC | 1YYV | 3F05 | 3MCZ | 3RA0 | 2NLV | 3G5G | 2VAF |
| 1DHR | 2X0T | 4GR9 | 3GZL | 2AUM | 4EAX | 1GU7 | 3GK7 | 3MT1 | 4J8Q |
| 3QJ9 | 3BN1 | 3SJG | 2B1G | 3LR5 | 1FR0 | 2YIL | 1N9E | 4BMG | 3ENT |
| 3DSH | 1X84 | 3K5T | 3INM | 1A9Z | 3ZZ3 | 3GDK | 2J0N | 3TVI | 4EY5 |
| 3BQY | 2Z06 | 4D02 | 3R3X | 1X13 | 2B4H | 1N5J | 1CG0 | 20ZE | 1WUU |
| 1022 | 2JK3 | 2CNB | 2X3J | 30GA | 2C2A | 2I8E | 3GW3 | 1V8W | 1J0E |
| 3GUR | 20H0 | 2NVK | 3K08 | 3MAS | 2ZV3 | 1XVI | 306Z | 4HR1 | 1BHT |
| 3PNO | 3RVA | 2HJD | 3CBY | 3F2V | 1KZJ | 1YCO | 4BC7 | 3PZJ | 2DWU |
| 1E2J | 3HTM | 1K9U | 2BHX | 2QMM | 1Y11 | 3EFK | 4HQM | 1SW7 | 1LNS |
| 1AJS | 1R0E | 3SD2 | 2WFC | 4GXD | 2QE9 | 3MPQ | 1VSK | 3FCN | 2Q7H |
| 1C8T | 6GSY | 3UHQ | 1JLY | 3GLA | 2E7I | 4G86 | 2I30 | 4DSB | 2GZ6 |
| 3LSC | 3KSR | 2W3H | 3A0C | 20HV | 1WYD | 3JSJ | 3N0T | 1TU8 | 3U1W |
| 2VFA | 2IF5 | 4DKL | 2NLO | 3LCR | 3W54 | 2E7U | 4GIW | 4HN1 | 3PUB |
| 1EAJ | 3UHB | 3Q01 | 2QD0 | 30Q6 | 2HBX | 3T2L | 1U0D | 2ZP1 | 1QAF |
| 1Z9P | 20BR | 2PAM | 3UFF | 2R82 | 4JXQ | 3R19 | 3T0W | 2X3L | 3HMZ |
| 20PY | 3ZZ5 | 3KUM | 3K30 | 1Q98 | 2AR9 | 1QZ9 | 30RG | 1JAY | 3LAS |
| 4KQA | 2NX8 | 2F8F | 1CR6 | 3K0L | 3GEE | 3FBG | 3DL2 | 3KGB | 3DS5 |
| 3LXU | 3APM | 3M5B | 1V5X | 4GWH | 2QEC | 2WUA | 3FHS | 2DD9 | 3TR3 |
| 1YJY | 3E6M | 1L8P | 3GX9 | 2PSN | 1U0U | 2P2S | 1TCW | 1T3J | 2GE8 |
| 1IC2 | 3BDB | 4FLA | 3UST | 3EP1 | 1JQK | 4EZB | 2CXN | 3BJ8 | 2GZ4 |
| 3TDJ | 1W02 | 3P1M | 2GZW | 1MJK | 3RHF | 2G04 | 4FS9 | 1P3W | 1M32 |
| 3PY2 | 1KVU | 4HFV | 10X8 | 2PD0 | 2XFV | 1NFP | 2FA2 | 1PSU | 3UH3 |
| 20MA | 4DBH | 4F4E | 4IDN | 3A16 | 2D52 | 30ZA | 3KHN | 2GB3 | 1UR9 |
| 1QKM | 3SY6 | 2RK3 | 20WY | 2YSK | 1F9F | 1GSF | 3Q6A | 2HTI | 2P11 |
| 2HXT | 3G1Z | 1TD9 | 3SM9 | 1EA5 | 3LWG | 1XI8 | 1XPY | 2Z1Q | 3P0K |
| 1AW1 | 1T62 | 2P07 | 2GPC | 2X6G | 2XL6 | 2G4C | 3A20 | 2PK3 | 1ELQ |
| 1S12 | 2VPH | 3N62 | 3N0S | 4E1J | 3JSL | 3NRA | 4EU8 | 1BG6 | 2W9I |
| 2XPK | 3ING | 2D1F | 2YX8 | 3U0W | 1U3Q | 1YS0 | 1YV9 | 3LVY | 3DCJ |
| 3D72 | 3Q58 | 206D | 3HT2 | 1JDF | 3PWA | 4EQX | 3PNM | 3CRN | 3E7P |
| 3JQQ | 1IZI | 1YYR | 2G9Y | 3FJM | 1PXB | 1K9T | 3P0F | 2HKV | 3UWQ |
| 2PPT | 2E2V | 1S06 | 3Q0X | 10Y1 | 3HCO | 3NTV | 3SXY | 2WK6 | 3SYL |
| 3QBO | 2R0X | 1ICW | 2VC3 | 4KGI | 30YR | 3P20 | 4A3T | 3D26 | 3N0X |
| 2JBA | 3FJ7 | 2CVI | 4E3T | 3HK4 | 2ZIF | 1GMG | 202E | 3AHH | 2YZK |
| 3G1H | 1ZZG | 2PSQ | 1G2U | 2FH9 | 2Y52 | 3KGZ | 2PZM | 2RAH | 3U1N |
| 2XSV | 2020 | 3ULC | 2VSV | 1LCL | 3N7H | 1WLW | 2TS1 | 4BBB | 1YFD |
| 2WZ1 | 1RZL | 1K0J | 3VX4 | 1QMG | 1QB7 | 3DP7 | 1TMI | 3MC6 | 1EYV |
| 30A4 | 2G8A | 1USL | 2XKJ | 1BAJ | 1Q0Q | 3ZXB | 10FZ | 1TSY | 3GBY |
| 3BG9 | 3HQ9 | 1G5X | 10D2 | 1A5V | 3GFX | 1S20 | 3BI2 | 20P0 | 2SPC |
| 4HKP | 4GW6 | 1TVL | 4F4H | 4FX0 | 1ZLJ | 3TLZ | 11BA | 2YAB | 1DR8 |
| 10HY | 2XF1 | 1VQE | 3RQS | 3ISQ | 2YI7 | 1VQI | 3R9P | 3E7D | 2QHC |
| 3ZRW | 2WQP | 1I5E | 20EJ | 1MSC | 3L7X | 1E71 | 3LGG | 2H8E | 3AST |
| 3UW3 | 1ZX9 | 2QD0 | 1SEV | 3DYC | 3ZIB | 1FUX | 1XAC | 2PQM | 1WV8 |
| 3KH8 | 3MBK | 4EUM | 3N3W | 1NIP | 2PLA | 3V4K | 4E51 | 1B8K | 2YY4 |
| 4FOM | 4DPD | 1RTR | 3ZW5 | 3Q5J | 4G85 | 1KP0 | 2CCY | 3P8L | 1GPJ |
| 2VH3 | 1YDK | 3F3K | 3S18 | 4IR8 | 2EBB | 3LTM | 1HQ0 | 3061 | 2B7L |
| 2BZS | 4JUJ | 4F8T | 10GL | 2IZ0 | 3UB9 | 3TER | 3LLW | 3B96 | 2EG6 |
| 3DKH | 2W5W | 4GFC | 1Z8H | 4JL9 | 1XDL | 3PRA | 1ZS0 | 3P9I | 1VP4 |

|      |      |      |      |      |      |      |      |      |      |
|------|------|------|------|------|------|------|------|------|------|
| 3VJH | 1JGS | 4EX5 | 2RC8 | 3TV9 | 2Y0F | 1JB2 | 4F0R | 3EWM | 3LNC |
| 3M46 | 3DT0 | 2Z8A | 3ACS | 3NZQ | 3IX6 | 3IJM | 3FT5 | 3LFV | 1MWQ |
| 2KI5 | 4GRX | 2WDW | 10HS | 3KXL | 1CJ2 | 1NCG | 1GC9 | 3HFU | 3GX0 |
| 3ZW8 | 3MFX | 1L8D | 1W4L | 4G6H | 3NFW | 2VJM | 10FN | 1JWK | 3G79 |
| 3MWK | 3EA9 | 1I0L | 3TKK | 1Z9N | 3K9I | 3AY8 | 3FIR | 2J5B | 2C3T |
| 3QNE | 2ED4 | 4FIV | 1VLK | 1WP0 | 2Q6F | 2CBN | 1VQF | 3HUP | 3U0F |
| 2X3F | 3M4P | 2J62 | 20YE | 3R2Q | 3SQM | 2ZZI | 2AXW | 3FKJ | 3M47 |
| 3D7E | 105T | 1RDN | 3NUI | 3KLW | 4AIR | 2XZ7 | 3FX3 | 2QY0 | 1SFJ |
| 2J9B | 1N9W | 3OV8 | 1TEE | 3EA0 | 1KVR | 1XHN | 1PXA | 3LB5 | 30SK |
| 3LHT | 3CJP | 1KMJ | 1D5N | 4ESE | 3L6B | 3TLO | 1G8T | 2QB2 | 3GGQ |
| 2R01 | 1DV7 | 1UW1 | 3TFT | 2R43 | 20BB | 1FXR | 1YPP | 2ZZW | 3M9Y |
| 1XI3 | 3HCY | 3PQB | 1IX8 | 1Y7T | 4AXV | 2VCJ | 1DDR | 2ZG6 | 1IAG |
| 1QYC | 1VGA | 3LHF | 1EV8 | 2EI5 | 1YLN | 3FOV | 4EDF | 10UW | 2CXK |
| 3F3E | 3FET | 4DJB | 1CSM | 2Q0B | 3MBI | 4DIL | 3H6N | 2ECP | 3VDN |
| 2IP2 | 1Y4L | 2PZD | 2NQK | 1C0Z | 4JG9 | 3BL3 | 30HR | 1EZZ | 2F07 |
| 3DV8 | 3TQT | 3PGY | 3H01 | 3QRV | 3KVI | 3FHW | 3EEX | 3VAY | 2RCV |
| 3NQW | 4FP7 | 2IK9 | 1A0R | 3I5C | 2BWP | 2QTB | 30XX | 2WHD | 2CYY |
| 30YT | 1F6L | 2DDK | 3IC9 | 2FT0 | 2QIW | 10AT | 3F5D | 4BES | 1XRH |
| 2GIY | 3TA6 | 1QIS | 3M41 | 3SZR | 2CH2 | 3E5V | 3HHP | 4G3K | 1SUI |
| 2PIM | 2QJ8 | 3UGD | 2H1T | 3F69 | 2AVS | 3RAC | 1ZXE | 3PI6 | 3KSG |
| 2ZAS | 1KHH | 3CCY | 2BNL | 3SB9 | 1IDM | 2W3P | 1BDR | 3IL8 | 2WVT |
| 2BMC | 1ZCP | 105H | 2VFG | 302F | 4B8B | 1IL0 | 2IBD | 1JPH | 4FGL |
| 1YNU | 2JCD | 10AJ | 1PCF | 2YL0 | 2P9D | 3N0S | 30P7 | 3IK7 | 3IPF |
| 3MCQ | 4J3C | 2J10 | 3K6T | 3IBM | 3QNL | 3BIL | 1B48 | 2JA0 | 20PT |
| 4ECB | 2P1Z | 1YQG | 3EX3 | 3GZ4 | 3HQ7 | 3MES | 1ESN | 1HQS | 1ZSY |
| 4A7P | 1Y37 | 3B4U | 2VP0 | 2R53 | 3BS3 | 3G8Z | 3K0R | 2IYP | 1BGJ |
| 3C18 | 2R9A | 2G39 | 3QPL | 1BWS | 3MGU | 2ZUT | 4EUC | 2J4Y | 4ICH |
| 3DZB | 3TN3 | 3L1L | 3FVX | 4B4C | 2YY2 | 3NX3 | 4ED9 | 2XRL | 2X8J |
| 1W00 | 4I3M | 1BDL | 1ILS | 3UAR | 1V9Y | 2I02 | 1XKF | 2B1Y | 1BV9 |
| 4IN2 | 3TJ1 | 1SW6 | 11AS | 10W2 | 1ZX1 | 4BI3 | 2IK1 | 1SXC | 2P2W |
| 2WKD | 3EVT | 4J40 | 1QNI | 1DXX | 3PX0 | 2V60 | 2JL1 | 2XXC | 4B8W |
| 2002 | 1LLF | 1XQU | 1X9E | 2VPQ | 3L1F | 2F8J | 4BDL | 20ND | 4H08 |
| 3M8V | 1J6X | 3LKK | 4HRV | 1PV2 | 3TWQ | 3H1S | 3IL9 | 3CB0 | 2R83 |
| 2I7A | 1K0B | 1B0T | 2J24 | 1QM5 | 1HF8 | 4EJ8 | 3JZ0 | 2VXB | 3H2B |
| 1FF4 | 3M92 | 1EXQ | 3K53 | 4EM3 | 3F4A | 2YSW | 3G3Z | 1U90 | 2HCM |
| 2D4U | 1XBW | 1CI1 | 4JE1 | 3MX1 | 3ZMD | 4BC0 | 20DM | 3HHX | 4L6W |
| 2XJ3 | 1E58 | 1J9A | 3VTF | 1HW4 | 3MAP | 1E9B | 2ZWM | 2BTM | 1CJ4 |
| 2AL1 | 3NSI | 3F5H | 2X1K | 3DMA | 3TH1 | 4EFZ | 2QC7 | 1LL2 | 4E4C |
| 3R2T | 3NBU | 4FX8 | 1JV1 | 3VC3 | 1TXN | 3E7L | 1VGY | 2NWU | 4GQF |
| 2VL1 | 3GE2 | 2FMB | 3JTJ | 1RGB | 3NUK | 2VGY | 3ZWD | 3P5Y | 2IRW |
| 2HU8 | 1CJ1 | 3LQE | 3AXZ | 3FFE | 2ZM9 | 3CET | 10SI | 3B3A | 4FNH |
| 1A25 | 1QB3 | 3E5D | 2HXU | 2CSU | 2FCK | 3G23 | 4FD3 | 2HP5 | 1PRG |
| 4A1F | 2D4C | 2XRM | 3D6K | 2YQ3 | 1SU7 | 10BI | 3HVV | 2CMJ | 2F4L |
| 3DD9 | 2UUU | 1EZ1 | 1I88 | 4DQC | 4KKM | 1LWH | 2FXG | 2XSR | 4G2B |
| 2P3C | 3P8K | 3GFM | 2HUT | 3T2W | 3GLX | 3IAL | 3B53 | 3KE0 | 3BXU |
| 1C9U | 1R6D | 2HZ5 | 2GU9 | 4L8J | 1BDM | 1WC8 | 3F6W | 1B8Z | 3IE3 |
| 3QWM | 1DLM | 4A07 | 1E9I | 1LKC | 3HHH | 3EM4 | 4B56 | 1ZRM | 3EUS |
| 2A0K | 2NV9 | 2WV7 | 2030 | 3U1V | 1AZB | 4IP2 | 10FY | 4DPH | 30E6 |
| 1V2D | 3Q3Q | 3MJK | 3ZW0 | 4H7N | 2PAR | 1VZ0 | 4GPO | 4GCI | 3PBU |
| 3HLU | 2ZAK | 2ATI | 3IDA | 3P2N | 2HYX | 3NQ7 | 2GJG | 20ME | 2PS1 |
| 1TYA | 1A80 | 3CY0 | 1B9I | 1IUX | 1JZL | 2FNI | 1MJF | 3DUW | 1LVL |
| 20U3 | 3E56 | 3TJ7 | 2VFE | 20BC | 3GDW | 2Y40 | 3NBR | 4AYT | 3MJ0 |
| 1TJD | 2VHD | 4BBC | 3DLO | 2WCE | 1KMM | 1NYH | 3KVR | 3L70 | 3N2S |
| 2P9H | 3V8D | 1ZP3 | 1F1E | 1AV8 | 3N0L | 1EKU | 3EHI | 1JB4 | 1DQR |
| 3063 | 3RLV | 2EWS | 1AR2 | 1ELZ | 1U8E | 1VGM | 2QQZ | 3CAZ | 3B4W |
| 1VK6 | 3KB0 | 2D63 | 2QJF | 2XLE | 3HF1 | 3HV0 | 3R0I | 2E2C | 1EYM |
| 1PQP | 1T10 | 3BQX | 3QLD | 3LHV | 3PA8 | 2RCZ | 1HCI | 3E06 | 3GAG |
| 106I | 3ZRG | 4AJR | 2JLD | 2FYX | 1Y7A | 2096 | 3CQ4 | 3R0B | 2EJW |
| 2J96 | 3TW0 | 2XV5 | 3LJQ | 2AU0 | 2D3M | 2R6V | 3PSS | 2X0L | 1FN0 |
| 1VRB | 3CSV | 4AF5 | 4EGT | 3E4Q | 2FKN | 2PK8 | 2EXU | 2EVV | 4KWA |



|      |      |      |      |      |      |      |      |      |      |
|------|------|------|------|------|------|------|------|------|------|
| 3ALA | 1JU9 | 1VHI | 3G7E | 1TIM | 2QSQ | 3ECF | 2C9S | 207T | 3JU8 |
| 2XBG | 3A9W | 3LEH | 2LJR | 2XHF | 2Y4D | 1LS0 | 3HFK | 1FLG | 3QIT |
| 1NHJ | 1C02 | 3AC0 | 3SYV | 1C0P | 3L7H | 3G1P | 3RJS | 3LR0 | 4B7I |
| 2AXQ | 2IXK | 2J70 | 1PTZ | 3UNA | 2TMK | 1I3C | 1IBF | 3F2U | 2D1G |
| 2B3V | 3ZCH | 3TZN | 2G7G | 3UPM | 2IJL | 207G | 3MSE | 3IML | 3UHA |
| 3S9F | 1KKR | 2ERQ | 3VLN | 3RV1 | 4BE3 | 2WMM | 3LQ3 | 3R8E | 3SAJ |
| 3TH6 | 6FIV | 1CM5 | 3GRZ | 3NTE | 3RH8 | 1UI8 | 2W1V | 2G84 | 1HW1 |
| 20JP | 4AYW | 3S09 | 1ZBQ | 3ANU | 3U9L | 2IFX | 3A9L | 1FP1 | 1PT8 |
| 1VL4 | 3DNP | 3VAB | 4AC0 | 10DB | 1U5J | 3BRU | 3ZN4 | 3BBJ | 2BHJ |
| 4FF7 | 4IAG | 1GD9 | 2ALV | 3U15 | 2VFH | 3AVE | 3PIU | 3U1D | 2R5W |
| 1JMH | 4D8F | 3GMG | 4HMA | 3QLT | 3G1W | 3KSV | 3PI7 | 2I5P | 3POL |
| 3V7P | 1T3E | 2P8U | 2038 | 1ZVA | 2HMK | 9RUB | 2HY1 | 3S6F | 3N2Q |
| 1XNG | 3E3H | 3NYG | 1VG6 | 4FRY | 2NN3 | 1GY0 | 3A36 | 3TR8 | 1QAC |
| 3NME | 3HHD | 3QZE | 3Q1K | 2PEK | 3GLV | 30Y4 | 2A4E | 207M | 2IMZ |
| 2Q03 | 2CKI | 4EJ0 | 3ZZD | 3P5N | 1BWB | 2PJS | 3ID2 | 1BWW | 3R09 |
| 3MDK | 3S0P | 3UB2 | 2A6A | 3MBF | 3HEB | 1QZR | 1IVY | 3DTT | 2QTR |
| 2XRF | 1YYA | 1ZE0 | 3II4 | 3U2G | 3TN1 | 2FFR | 2QJD | 2R6I | 2QJW |
| 1P43 | 2R60 | 3CEW | 4KF9 | 3Q90 | 3C0K | 1VFH | 3ZBW | 1Q2W | 4AQI |
| 3072 | 2I0C | 3BW4 | 1P2P | 3D8X | 1DPG | 5HBI | 1S7I | 5EAA | 2G40 |
| 2HUZ | 2IWH | 3T90 | 3RBL | 1IS6 | 3I5T | 3T69 | 3D62 | 2QTA | 1WL0 |
| 2HUH | 1XD7 | 3NK6 | 4AY0 | 2V6K | 3KBQ | 2C3B | 1IB5 | 2WP7 | 3N1S |
| 2HA8 | 3NDC | 2CZ2 | 1TLV | 3F4L | 4BDG | 2NZ7 | 3NEI | 3GTV | 3DVT |
| 304N | 3F6D | 1GQ1 | 3U00 | 4GQW | 30FG | 4IW7 | 30QU | 1XSE | 2R26 |
| 2XGA | 3P2Q | 3MJY | 1EM6 | 3MPH | 3H2Z | 2V40 | 2C08 | 4AXS | 2J7T |
| 1PYB | 3ES2 | 3QP5 | 2PZP | 3FSL | 3TBA | 20QI | 1R22 | 4EP4 | 3SD0 |
| 3V69 | 3TBF | 2XIJ | 4E4J | 1E2R | 1KMZ | 3UQH | 3TZ6 | 1HUU | 1VGQ |
| 2W5X | 3QBJ | 1U8S | 3UQN | 3NFC | 2B18 | 3FJT | 3VGS | 3ROU | 2RSP |
| 3LVE | 2HY0 | 4AYA | 3002 | 3GZI | 3T35 | 3FMY | 2ARV | 3PDK | 3K6Z |
| 3TTP | 2N02 | 3EN0 | 3LHC | 4BL4 | 300M | 2Y92 | 3EIU | 3010 | 2WB6 |
| 301N | 3NWR | 20WV | 3B02 | 1TYT | 3ERM | 4FCU | 3TN5 | 1S4D | 3HR7 |
| 1T70 | 1NOK | 3TR0 | 2YG4 | 2V03 | 302K | 2DDM | 3LRJ | 1NCE | 2DKH |
| 3KW3 | 4I7H | 2ZUC | 1LUL | 1VJQ | 1TSI | 2A61 | 1B8U | 3EJ0 | 3L20 |
| 2QYA | 3T5T | 1URU | 2R47 | 3N2B | 3LWC | 2P05 | 2AV0 | 2B4G | 3G3S |
| 3CBU | 3TLB | 3B8V | 1IQX | 3RLC | 4GFL | 4F98 | 1PBB | 4D90 | 4ISD |
| 3TD7 | 4DF9 | 3VK5 | 1IGQ | 4G12 | 2C82 | 1EVL | 3PG8 | 2A96 | 3JTF |
| 1WA4 | 1GJQ | 2X3B | 1NKD | 3FPJ | 3GFA | 1EYE | 3GWR | 3E5U | 2CU3 |
| 2BIE | 3R0G | 1IEG | 1UWK | 3LWJ | 1QFH | 2C5A | 1Q05 | 1B6U | 1ET0 |
| 3G80 | 1ASS | 1M44 | 4A16 | 3PFE | 3S2W | 3IF0 | 3IQY | 4DVH | 3RGL |
| 10N2 | 3F8R | 3R3Z | 1K0Z | 1AN8 | 3PHA | 3F72 | 3UCA | 3QTH | 3VRC |
| 2Z25 | 4JQP | 4GIC | 3M1G | 3TYA | 3QM3 | 3F4K | 2PY3 | 2H0Y | 1MY6 |
| 3T1I | 1AIU | 1YB7 | 304Y | 1TBP | 4I3L | 10NS | 3DXI | 2Y6B | 1I12 |
| 2VJP | 3BLL | 3FF0 | 3U83 | 3TQU | 4AW3 | 2Q30 | 3EL6 | 1J1C | 1EPZ |
| 2BM4 | 2WJ9 | 3GV3 | 3KII | 1F0F | 2EWP | 3H78 | 2EFR | 2P3Y | 304Q |
| 2III | 1DBQ | 3UAK | 3N4W | 3RYK | 1YAI | 2XVI | 3Q7E | 3R0A | 4MV2 |
| 307B | 3NJ0 | 3AAC | 3AXS | 3GYW | 2WUI | 3EA4 | 3FXH | 2ANS | 4AB5 |
| 1MTB | 1GUK | 2QXS | 2ZZ5 | 3PF6 | 2GIU | 3RX6 | 3AHJ | 1R9D | 1P6K |
| 2G9I | 4HG0 | 2WZT | 3RY7 | 4GCM | 3EUA | 1WWK | 1P90 | 1H99 | 1MNA |
| 1X1V | 4A5N | 2WJX | 2NZT | 1KV5 | 3BBL | 1V03 | 3NJ2 | 3ER6 | 3RQK |
| 2XWL | 204C | 3HEJ | 2C0J | 1WN2 | 3VRH | 3JZ6 | 2BPE | 3AGA | 2PEX |
| 3KKC | 4E1E | 1F6Y | 1FUN | 3CGH | 1YHB | 4FUM | 2XGZ | 1B6J | 3TV7 |
| 2EPJ | 20WK | 2GY0 | 3A04 | 2XR7 | 1F12 | 20A2 | 3HN2 | 3FMS | 20QM |
| 1E1T | 2NRB | 3B33 | 3T43 | 4DEM | 1FDS | 3A6R | 30N4 | 4DQ2 | 3VPR |
| 2HYP | 1PL2 | 2ZB6 | 1H1M | 1CMB | 4IV9 | 2Y84 | 3DMS | 2VVX | 1V53 |
| 1SMK | 3RKT | 30N3 | 1HTI | 1BTM | 2PAQ | 3JVN | 1I1D | 1WUE | 2BN2 |
| 2B5A | 3QEN | 4FLM | 1QSJ | 2V5S | 2QM7 | 1BP0 | 1ZKP | 3MWC | 3FDK |
| 1VI0 | 3V3E | 4H9V | 3JX6 | 1064 | 2PHI | 3TZB | 1ASU | 4HWU | 3FYA |
| 4JG0 | 3H5W | 3IMI | 30CA | 1HDZ | 3GFJ | 3LI0 | 2JJF | 1QC9 | 3GZC |
| 2NCD | 2PH5 | 2EH5 | 1H72 | 10B9 | 20K0 | 3PS7 | 4G6X | 1NIU | 2YZT |
| 4BEP | 3BPJ | 3U71 | 2PPQ | 1S66 | 4J6F | 3K2Q | 3QDK | 4BD0 | 1IZ3 |
| 1VCV | 2AQX | 3TQC | 3BIX | 2WTX | 2PGV | 2DC0 | 2I51 | 4EQH | 1MD4 |

|      |      |      |      |      |      |      |      |      |      |
|------|------|------|------|------|------|------|------|------|------|
| 3P7J | 3MQ4 | 2YCF | 2GQR | 2Q0P | 2WUJ | 3E5H | 3E0Y | 10BK | 1U3I |
| 1ZA5 | 4GR1 | 1S09 | 3CNI | 1GNM | 1GT8 | 3IHK | 2H8I | 3C8E | 2J8R |
| 3EX9 | 1SW3 | 3BT3 | 2J3N | 1YY7 | 2YEA | 2P12 | 3QT5 | 1R43 | 1IQC |
| 3LVS | 1NRG | 2ANI | 10TW | 201B | 3G1X | 4HKU | 30F5 | 2YR1 | 1TP2 |
| 2AN2 | 1XK7 | 2RA6 | 1B63 | 2E5D | 2WFH | 2X0F | 4E0B | 3LM0 | 2GUU |
| 3Q37 | 3QPH | 1BP6 | 3LS9 | 1VLC | 4GXG | 4H30 | 2WLO | 1G8L | 1EF0 |
| 3NOV | 3TKU | 2AMJ | 3HJP | 2WP0 | 1T3G | 2WVN | 3CZ8 | 3EN2 | 2I9I |
| 3I6X | 1Y5H | 2V4N | 3RD6 | 3UER | 2BSM | 4ALG | 1NS5 | 2BYJ | 2NX4 |
| 3K1E | 3P8T | 1JIQ | 1IBB | 1IZY | 1M9N | 2ZJ3 | 1M76 | 2PCA | 1RPA |
| 1AU0 | 2XH0 | 1BJW | 4INJ | 2G89 | 2TRT | 2JKY | 2PH4 | 2ASF | 3KTY |
| 3GRA | 1N99 | 1GZW | 4ACI | 1SEP | 3D82 | 1W1U | 3GFF | 1ZCZ | 1XD8 |
| 2YAZ | 3LDT | 2X2S | 3L43 | 2XZ2 | 1JWN | 1EZI | 3QP6 | 2WQH | 4L0N |
| 3H8U | 3I4J | 3BPX | 3OCX | 3KHY | 3RUY | 2FGC | 1XVS | 3VA8 | 4JNQ |
| 2NR0 | 2H2C | 2UW1 | 2IVY | 1TYD | 2VCT | 308Q | 3NI6 | 2BIH | 4ECC |
| 3LOW | 3N3R | 2EGW | 1VE9 | 1UBV | 3RF6 | 1CML | 2X06 | 1JYF | 3ACT |
| 2DU9 | 4H87 | 2XLD | 4EQW | 3RT6 | 4ART | 3UA3 | 3U2M | 20N7 | 3IGR |
| 1FA8 | 1T1S | 2X1Z | 3Q29 | 4ATM | 4DMG | 9GAC | 2CH9 | 3CY6 | 2ZVT |
| 3G7Q | 3LAG | 1FC4 | 2G87 | 3ZJL | 3B1D | 2WES | 4E8B | 3EN8 | 1I2L |
| 3P96 | 1JL0 | 1AQ6 | 4J7J | 2XGT | 3N29 | 1YLK | 3HL4 | 2AX4 | 3CS2 |
| 1A43 | 4GAE | 3DEV | 2DB0 | 1WJG | 2I4L | 2WEP | 1NP6 | 2PSR | 1HSZ |
| 2Z0A | 4DBC | 3K6H | 2C5S | 3055 | 1KM6 | 3CNU | 1GNW | 4ECH | 1INR |
| 2W43 | 3NZP | 2QIS | 4G41 | 2Q79 | 2Z2W | 3HAD | 1A7G | 3A65 | 1J4A |
| 4DBA | 3N6V | 4AU5 | 3RJ9 | 2FV2 | 4A09 | 3DSP | 1VME | 3JYQ | 2VRN |
| 4F0C | 1JDE | 1XK0 | 10LZ | 1YIG | 1J33 | 1JLH | 2IK2 | 3PFC | 3QYC |
| 4ADD | 2J7J | 1VSG | 1JYE | 2Z3Z | 1Y20 | 2WY0 | 2X0Q | 3L18 | 3BF4 |
| 3EGQ | 3MK2 | 4AYZ | 2P3A | 1VMI | 3CJE | 1XXU | 4GHJ | 1YCF | 2GUH |
| 3HEK | 20WU | 2E10 | 3GJC | 3C5U | 4EAQ | 3D4I | 2GSD | 4GR2 | 4FUK |
| 2GYQ | 2B4D | 2074 | 1PGU | 3RQP | 3PLT | 2QM9 | 3NMH | 2QM4 | 4GWB |
| 2Z0Y | 3JWU | 3EDK | 3DAX | 1RBA | 2VG2 | 2JAA | 1TUH | 2P5S | 2D65 |
| 3MEX | 3V4Z | 1DIK | 3E0L | 3EG0 | 3B0S | 2IHF | 4FMK | 1I0R | 4H9U |
| 1IJY | 3UV1 | 3BSF | 2JFU | 3IPI | 3HJV | 4G3V | 4AV6 | 3PSV | 2ZM7 |
| 3W5W | 3BNJ | 1Y25 | 20KU | 1HUR | 3STQ | 4HZ2 | 3K8A | 3EBU | 2X4I |
| 2JBW | 1UES | 1VLJ | 3EXQ | 2VUX | 2H2U | 3EMM | 2P3D | 1BHY | 3AHG |
| 3FCM | 2RDZ | 3FJV | 2AV8 | 4AGI | 3IJQ | 2HN1 | 2REY | 2XUA | 1EBL |
| 3KR1 | 1MZF | 1G7X | 1EZG | 1SB9 | 2ITB | 20D6 | 3T8K | 2RK9 | 3MP4 |
| 2JCX | 3CES | 2V5L | 2EX2 | 4DHL | 1X6M | 3JTX | 3HL0 | 2WZ0 | 2P8J |
| 4E2G | 4EH1 | 4KGF | 1ZBR | 4B54 | 4A0G | 1ZXY | 3IKH | 1R8J | 4FEA |
| 4HCX | 1E0G | 2W27 | 3KMJ | 1MSV | 3ZBY | 30LQ | 4IJA | 3BAP | 3K40 |
| 3H1N | 2QG7 | 2G1U | 3PWR | 4J2F | 2JGT | 2DD7 | 2QIB | 1U3J | 1ZPR |
| 1PDV | 4JXN | 30P3 | 4HFG | 4HAM | 3LV1 | 10Y5 | 4FDV | 4HZN | 3BRI |
| 3TJR | 2DC4 | 2B5W | 3A4N | 3I3H | 1AG9 | 4CSM | 2G6J | 3JR2 | 4B1A |
| 2ZLY | 2H2K | 3E39 | 1HAV | 1Z45 | 1EQW | 3S8K | 2NAD | 3TJX | 1ALI |
| 1YX0 | 3L8U | 3T0L | 3NAQ | 1S2P | 1YZX | 3UB4 | 1E19 | 2F48 | 3CXP |
| 1U6S | 3VBE | 1M9T | 4EWP | 1TMH | 3V9L | 4JWP | 3MGM | 1JBG | 4ERA |
| 3CV0 | 1ZEJ | 2D13 | 2EB0 | 2AQS | 4FDB | 4DNA | 2VFW | 2I3C | 1KSI |
| 1IXM | 1LHP | 1E06 | 2J0W | 2D2X | 1PDH | 1Z5A | 3AU0 | 3JTH | 2BHS |
| 1K8U | 2ZNJ | 1R0K | 4AP5 | 3CP3 | 4J75 | 2YYV | 2ZZ1 | 1RL8 | 1W7N |
| 1V8Y | 2GEN | 4E0E | 3IL5 | 3ITF | 1UUF | 1WQ9 | 1ZCY | 3U1B | 3TBM |
| 3KNW | 3L5Z | 1I07 | 30XP | 3LQ7 | 1V2Z | 4G6C | 4AKK | 3MTV | 3B1T |
| 3PJB | 2XH4 | 3UHW | 2003 | 4H9Y | 2Q3P | 3PTY | 3RGR | 3TY7 | 1HLP |
| 1S2Z | 3M6J | 2HNG | 4L8N | 3ZWP | 2PBX | 1WC9 | 3NC4 | 2XGX | 3P01 |
| 2CAR | 2DLB | 3CSX | 3BEM | 1JMI | 2IJJ | 1YW1 | 3ADT | 1AAQ | 3IA0 |
| 2VPA | 3QE0 | 4F28 | 3GVV | 3B7L | 1S0X | 2Y78 | 3E48 | 3FEG | 3BDG |
| 1V5H | 1V5B | 4FJ6 | 30CY | 2CJR | 3NIB | 4HW8 | 3ZV8 | 3ICX | 2ZU8 |
| 3OKW | 3KDI | 3G3K | 3PK0 | 1VQD | 2GMS | 3F8D | 3DR7 | 2Q1X | 3I2W |
| 1USM | 2YXE | 5MDH | 1PTA | 2HQM | 3VML | 2YMA | 2FB1 | 4G2E | 2RC3 |
| 1IQB | 2F3M | 1V2X | 3EFE | 3PX2 | 4DFH | 3IFE | 3E9K | 20D0 | 3EQR |
| 1BPJ | 1BW9 | 4JNN | 30K5 | 1PQW | 2PV7 | 2QMO | 1UKK | 3DUP | 2Y4F |
| 2GSQ | 30QA | 3QTT | 2I79 | 1PV9 | 3KD6 | 1A9Y | 4H3Z | 2Q3A | 3IGF |
| 1NXH | 3ID3 | 2C5J | 2JIS | 3UY4 | 20HC | 3F0A | 3FF1 | 2DW6 | 3U7I |

|      |      |      |      |      |      |      |      |      |      |
|------|------|------|------|------|------|------|------|------|------|
| 1U7W | 2CG3 | 3RH2 | 3MQD | 4GEB | 1WY2 | 2JGD | 2C49 | 4JRL | 206X |
| 1AF5 | 2Y0Q | 3EGC | 4B0N | 200K | 3GMD | 4LVE | 2I4V | 1XUB | 4AF2 |
| 3FYN | 4AQB | 2I3D | 3E17 | 2A72 | 4HQV | 3MCW | 1VD6 | 1F5V | 1VE2 |
| 3EXC | 1G08 | 2PWL | 30Z7 | 4EUT | 1I7F | 3G8Y | 1HYV | 3AEX | 3031 |
| 1WPP | 1MD0 | 3MMH | 3M3C | 2PJQ | 1YGT | 2ZB2 | 3EDE | 3UM6 | 2E6X |
| 1KM4 | 20CP | 3IPT | 1T92 | 3R3H | 3TC1 | 2Y00 | 5RUB | 3FFY | 2FA0 |
| 2P0B | 4DN6 | 3AIA | 3HA2 | 1ITZ | 3ZH0 | 3H10 | 1DQW | 3BMZ | 2C6X |
| 4FTX | 3VVZ | 3ET5 | 2CL3 | 4E3Q | 3A01 | 2HS2 | 4F5Y | 3E97 | 2Q1W |
| 2HKN | 3GG0 | 3B60 | 1H21 | 2X2N | 1VQU | 2ENX | 3L9Y | 4B7C | 1X7U |
| 3E8J | 1A0F | 2RKK | 1GRP | 3LTE | 4GSA | 2ALX | 2WCW | 3TSN | 3JXE |
| 1M1F | 3EJK | 3ZPG | 4FQ9 | 30W0 | 2TDX | 3KXP | 1G5Z | 1Q0U | 4FVB |
| 2IF9 | 2ANJ | 3REM | 1V3E | 3PF3 | 2PY8 | 4F95 | 1JYA | 2IXE | 3FS3 |
| 2UV7 | 3DR6 | 2GW1 | 3FLJ | 3DVF | 1EX0 | 2YDX | 3CZA | 2IWE | 1U4P |
| 4GYM | 4H89 | 2RI0 | 1VJ0 | 3FJ5 | 1YSD | 4DQB | 2H9B | 1XT0 | 1GER |
| 3GW0 | 2GQD | 3F43 | 2IMK | 3L08 | 2G8L | 1REG | 3EM3 | 4B74 | 3W00 |
| 4K7G | 2JBX | 3KDW | 2W0Z | 3EL4 | 2P3W | 2G0P | 2D4V | 3Q62 | 1ZL9 |
| 1WL1 | 3QMR | 3N4K | 3D34 | 4ADN | 1QI9 | 1JR8 | 3T5M | 2I7D | 3A52 |
| 2Q3M | 1J0J | 2X01 | 3CJL | 3D3K | 4ETS | 2ITG | 4EM6 | 1T82 | 2J98 |
| 4IAQ | 2D0J | 3IN8 | 3FN6 | 3QYF | 2IH0 | 2FHI | 2VG1 | 3BQ3 | 3FJ1 |
| 3E0K | 3A60 | 2XEF | 2YHY | 3FHM | 1WWM | 1V05 | 4EGU | 2HZP | 4AQL |
| 1GWJ | 2XDN | 2VR7 | 3B9I | 2Y8V | 3E4U | 2PB4 | 1F1A | 4GVM | 1S3H |
| 1VM8 | 22GS | 2FE1 | 3CY1 | 3RH1 | 3SBR | 1SCQ | 3HKX | 3KB4 | 2GS9 |
| 1HUX | 1CL0 | 104W | 1IPD | 2F6S | 4HN3 | 3DTF | 3NR1 | 3U6V | 3HFT |
| 3MGD | 4DLL | 3A1I | 3H0K | 3QUA | 2PYN | 3IQX | 3D6G | 1XEF | 2WKG |
| 2PFL | 3I12 | 4FZS | 2IHY | 1ETV | 4K2X | 1WKV | 1GDH | 1ULZ | 3D3N |
| 3RPJ | 4F8Y | 30HI | 9GAF | 1G4X | 1MG5 | 3G12 | 1X8Y | 3INR | 2J7Z |
| 1XE6 | 3KZP | 2ZZ2 | 1HL4 | 3I7F | 2XT4 | 1GKH | 2VC7 | 3LSS | 2VJY |
| 3L67 | 3IWZ | 4AVR | 1XF1 | 2A06 | 3U0E | 1HRK | 1MQE | 3FTB | 2WNX |
| 4DB8 | 3UF2 | 1QE0 | 1I8B | 3LE5 | 1TRE | 1PP2 | 1NA8 | 3ZN3 | 3BA1 |
| 1W6Y | 1YV0 | 3HDT | 2H5G | 1HZV | 20QL | 2DKN | 2A4M | 2057 | 1ZZR |
| 1NW1 | 3C97 | 1VLR | 2GAU | 2FIC | 2W41 | 1JPY | 2GV8 | 2V2C | 1Q2X |
| 3QHA | 3P41 | 1DQP | 2PMF | 1F1C | 2CA1 | 2VSG | 1ZGS | 3P1J | 1MGV |
| 3PID | 3RKS | 1Q0R | 3TNL | 3UE9 | 3D5N | 1ZK9 | 2H0U | 2J1D | 300H |
| 3V48 | 4IQ0 | 4HAC | 1ETX | 3VLK | 3ZY7 | 1D0V | 3G0A | 3BJE | 3VZ1 |
| 2G5C | 3C1Q | 1ALK | 3VGJ | 1U7D | 1VE1 | 5FIT | 3BX0 | 4HB7 | 3NSX |
| 4GNV | 3ZVI | 1T3I | 3FVM | 3RUC | 2HUV | 2ZM2 | 2FPN | 3NEU | 3IT3 |
| 2WKI | 1YUD | 4AIG | 3IQ0 | 3GBR | 2IPH | 4J7U | 4H49 | 3G80 | 3IFU |
| 3Q05 | 2Q8H | 2XP1 | 3EB0 | 3TKJ | 2WV0 | 2VNV | 2IXF | 3HA1 | 2A2A |
| 3KEX | 2VR0 | 4BDR | 1DTS | 2GBB | 1MG0 | 4G8S | 3B5K | 1U36 | 2CYC |
| 2IQQ | 10XH | 2VJL | 3TY3 | 2NR4 | 3LZS | 1QLL | 1PM7 | 1GYX | 3M0S |
| 3GBV | 3HJ3 | 1CZ3 | 5JDW | 1CZJ | 3TYP | 1IG0 | 3LSJ | 3PUI | 1U2W |
| 3Q7L | 1U87 | 3IBS | 2YF0 | 2BII | 3G7J | 2W2G | 3N06 | 2GC9 | 20U5 |
| 2XT2 | 3HMU | 30TR | 2Z02 | 3F0N | 1E5D | 3HDC | 1ILK | 3N7U | 3D8B |
| 2BHT | 2YGU | 1VSJ | 3QTC | 2XC0 | 3UN0 | 3U8Z | 2R6M | 3BPV | 1N8K |
| 3NTL | 3HKV | 2XSQ | 2QQQ | 3E5N | 1I83 | 3G7D | 2I0H | 2INB | 1QIT |
| 3R77 | 20MK | 3MVG | 1X1Q | 1TIY | 3LYX | 3Q80 | 3NQK | 2QAI | 3FPE |
| 3ZXQ | 2P4G | 2REK | 2X3E | 3EDW | 1AMK | 1US6 | 2VYA | 3EHC | 3T8Q |
| 306G | 1EVG | 1XFD | 2HHZ | 3QK9 | 3B7P | 2HQL | 3TE7 | 3NX4 | 3D08 |
| 1B49 | 4EXJ | 1Z7D | 1UAJ | 2UUQ | 2C3S | 1N19 | 2ZNY | 4FBM | 2QUM |
| 3TNB | 1R7H | 4IZ9 | 2ZVY | 2CCA | 3ZDU | 2XGU | 3Q9C | 2GEL | 4A3Q |
| 3JPU | 30NT | 4GSS | 1DDZ | 3BID | 2ZM8 | 1VQH | 3LR4 | 2IML | 4HCE |
| 4AK6 | 4AJ6 | 2A2J | 3RIC | 3CT9 | 2VPK | 3EBT | 1VF1 | 1G1A | 1KA8 |
| 2VAJ | 3PLN | 2AS0 | 1A7W | 4HYL | 3QII | 20KI | 4E4R | 1Y8G | 3BXW |
| 1U0K | 3CEQ | 3GR5 | 2RA5 | 2PNH | 4EC7 | 2SHK | 2CC3 | 4AK5 | 1XRK |
| 2QL8 | 2E67 | 2A0U | 2GUC | 1Z1J | 1B98 | 3UV0 | 2C9Q | 105W | 3K67 |
| 3FY6 | 3ED7 | 4H3U | 1BGF | 1WNF | 2YJG | 1FP5 | 3LG0 | 3DZ8 | 3C3D |
| 2Z00 | 2XXX | 301C | 2R6U | 3EH7 | 2E9Y | 1LGP | 1UV5 | 3N04 | 2DGN |
| 2Y7A | 30LJ | 1CG1 | 1VSM | 2BB3 | 1UB7 | 3A2L | 3CNG | 2ITM | 3BNY |
| 3UL5 | 3NBS | 3W0D | 1SQU | 3QI3 | 1EE9 | 30K8 | 3T81 | 1UTU | 4F5H |
| 4EFV | 2HIQ | 3IVC | 1I45 | 1Y7H | 1LPF | 3NB6 | 2IQT | 1VJ2 | 1S07 |

|      |      |      |      |      |      |      |      |      |      |
|------|------|------|------|------|------|------|------|------|------|
| 3RBU | 3RMH | 1KM0 | 1ZVU | 2Z24 | 1YQZ | 4JAO | 1XV2 | 3FRS | 2BGC |
| 3CIS | 2D1L | 1P4R | 4EIN | 2DXQ | 2A99 | 3B0A | 3I0T | 3QM2 | 3LZQ |
| 1PN9 | 3VZ0 | 1UAQ | 4DN7 | 1A40 | 1TFG | 2QC0 | 4A01 | 2V0M | 3HDJ |
| 2X5H | 2PUZ | 4E71 | 1TW9 | 2GUX | 1ESC | 1Z05 | 4DFE | 2P64 | 3HKF |
| 3L65 | 3QE6 | 3074 | 3DWC | 1E9C | 1JMF | 1MP9 | 1ZW5 | 3N8W | 2AZU |
| 3TN6 | 30D1 | 200T | 2V3M | 3BB9 | 2VU0 | 3KB7 | 1ITU | 1KNW | 2B2K |
| 3N1T | 2PQV | 3N0N | 1TD2 | 2XJ6 | 3PX3 | 1AHP | 4FU0 | 2VAX | 3FZ5 |
| 1E11 | 1Y4U | 3AC9 | 3LNR | 1P6N | 1PCZ | 3K32 | 3ZXT | 3ESM | 3BDF |
| 1YKW | 3HS5 | 1F4Q | 2Y74 | 3F7C | 4FLB | 3TRF | 1M0W | 2ZCN | 3G48 |
| 1AXG | 1L4K | 2HX0 | 3B9T | 2QE4 | 1H1C | 2G6W | 1NF9 | 1CQE | 1UWW |
| 2QNR | 4G9B | 3LQN | 3BH0 | 3T9Y | 3TDM | 4KFN | 3UPY | 2YIJ | 3KOM |
| 1PM2 | 4DUP | 1EV7 | 3DNS | 2PTF | 4FTP | 3OZL | 2QYB | 3KKB | 3I3N |
| 1ZVN | 2P55 | 1M00 | 3V8R | 3LHR | 1NVJ | 2HB2 | 3KB0 | 2VET | 3A1E |
| 1VPL | 30MS | 2HYT | 3M8E | 1F13 | 1EN5 | 1YCL | 204M | 3QBW | 4HSZ |
| 1NSJ | 1F0N | 1QPQ | 30HT | 4GA3 | 3NAV | 3I32 | 2WIQ | 2AWP | 1UYR |
| 4H02 | 1K2U | 4EP5 | 1MSS | 3W08 | 3LA3 | 3STT | 3K7T | 2XXT | 2YC0 |
| 1F75 | 2ZL5 | 3DR5 | 203A | 4INI | 2CY5 | 30J0 | 2I9E | 2DIK | 3UDX |
| 1ZKA | 2ZKJ | 2I9U | 1PFC | 1HTT | 2DG2 | 2FMY | 4H9X | 3N20 | 3EPV |
| 3RH7 | 1V70 | 2PFC | 3IWJ | 1012 | 1XQA | 1QJH | 5BJ3 | 4AE7 | 2A8N |
| 2QTQ | 3KVH | 3G40 | 1ZES | 3KZH | 2IME | 3FKD | 4F5E | 1Z50 | 2RHE |
| 1SD6 | 3GDR | 3F9S | 2LIG | 1T50 | 4DIK | 2PS7 | 2XBQ | 1S0A | 2VFZ |
| 3LI7 | 4GEW | 2QCQ | 3NEK | 2YKY | 3QST | 3KX0 | 10HB | 2D5Y | 3RR3 |
| 3ITJ | 4HUZ | 1UX5 | 4ILK | 1T00 | 1WV4 | 3BTU | 4JA8 | 3NRQ | 1BU0 |
| 3DH1 | 3T0X | 2YB0 | 3WRP | 4K8T | 3GAS | 3F84 | 2X3G | 1TZB | 20F7 |
| 3C9D | 1Z8L | 3CAI | 3KP3 | 3Q0S | 3V1X | 20RD | 30X0 | 2V4M | 2Y40 |
| 1LCU | 1YER | 2H3B | 3ZY2 | 2DGB | 3DB7 | 2HXV | 3ZT3 | 2AQL | 2E0T |
| 3GTT | 3G3J | 1RRM | 3MIL | 3VE9 | 3IX0 | 1GQL | 3C4J | 2D2G | 3UHV |
| 1D8H | 3KS2 | 1WA9 | 1TVE | 2W57 | 1VH5 | 2PRX | 2A9C | 2YL3 | 3ZYL |
| 2Q3T | 20GE | 1AD3 | 2Q40 | 4FDL | 1YYT | 1IE3 | 3Q18 | 1U42 | 1AN9 |
| 3A5P | 2HYJ | 1FB7 | 3TFH | 2PZB | 2ZY9 | 30D0 | 3JSS | 1L7E | 3Q12 |
| 4FE7 | 3H7F | 4AEA | 2B60 | 1YKD | 2G5T | 2AV6 | 1ZH8 | 2QM3 | 1ZZS |
| 1X0J | 2EL7 | 2HKU | 1TLU | 3JU2 | 1RGG | 3R60 | 2PTY | 2PZ9 | 3GH0 |
| 4K2W | 1Z6Z | 1RFB | 1KZA | 3ENP | 4E5K | 4ING | 4IPL | 2AF3 | 4H65 |
| 4GYH | 4A7Z | 3KLX | 1WZI | 3BCX | 3JUZ | 2X3C | 3V0M | 1FCJ | 3SJ3 |
| 4AEC | 3KYZ | 3RQ1 | 1HVS | 2YBQ | 2DFI | 1U5W | 1EV9 | 3FKT | 4EJR |
| 1V10 | 3KKE | 2PSS | 3LMD | 4L1J | 2EUC | 3NCV | 1QQH | 1XQK | 1T8P |
| 1DL5 | 1YRP | 4G5A | 3M1E | 3IS6 | 3K4S | 2R42 | 4DUN | 3UT1 | 2ZEW |
| 3EUF | 3SK1 | 1PXT | 2YXH | 3F9T | 3DI1 | 3E9Q | 2F5G | 4GAP | 3E5T |
| 3FCD | 20GI | 1EK3 | 1Z83 | 3FPD | 3R8W | 2IV0 | 2BES | 3JRZ | 1BF3 |
| 4H1Y | 2B8M | 1WWZ | 2R5E | 1ZKZ | 2J8Q | 1KYQ | 2D2A | 2BSH | 4EF5 |
| 1N1A | 2GD5 | 3LZA | 2AZJ | 3VFB | 2VEA | 3SG6 | 2VIB | 3TGN | 3GL5 |
| 3QBD | 109Q | 1WGT | 3GD0 | 1E1E | 2NUL | 3EI5 | 4DKK | 3AAK | 3BV4 |
| 1PGT | 3HA4 | 3QU2 | 4HBP | 4A1Z | 3F3X | 2CVW | 3BUT | 3LHU | 3FGW |
| 4A6U | 1SFP | 2FXJ | 3CE1 | 2ZUG | 3N8B | 3TQX | 2DQ0 | 3DMC | 2RKF |
| 4H5B | 10J9 | 2XGD | 4H0P | 4BR1 | 3QJ7 | 2Q2I | 3ZUY | 1YGA | 3FH3 |
| 3HJ0 | 1ZBS | 1IQ6 | 3MPN | 3TDG | 3GFD | 2AML | 1D2R | 1P4A | 1ARH |
| 2VL3 | 2BTU | 4E77 | 2NX9 | 1E77 | 1BIS | 2C59 | 1X74 | 1B07 | 2FRE |
| 1WQ4 | 3LYG | 3K2N | 2A67 | 1AE3 | 2CZG | 1N5X | 3K6E | 4GMH | 2FDS |
| 3U4G | 3MI7 | 3F7E | 1WAL | 2CJW | 2Y1Z | 1BYU | 4AMG | 3IIC | 3HID |
| 3DF8 | 2WTN | 3LA0 | 2XL0 | 1NWI | 1BKG | 2E25 | 2HGX | 2QDT | 3NQF |
| 4J0S | 3R6J | 1FP2 | 1W9C | 3NI7 | 2Q03 | 3VBB | 1PIZ | 1HFS | 3ONX |
| 3AUF | 3CY4 | 3V6N | 3EAW | 1DPR | 3CNX | 1EN6 | 3PU9 | 2BJI | 4F9I |
| 3DN7 | 3IW3 | 3Q31 | 2JJE | 1T4C | 3KTL | 4EMY | 2B69 | 1AY4 | 4F44 |
| 3JX8 | 2P4P | 3K0Z | 1U0M | 2GS7 | 1JF9 | 4JIX | 4GX0 | 3VOL | 3HL6 |
| 3U1U | 4JQ8 | 1CTU | 1AZW | 4I9G | 3MPB | 3T38 | 2WGG | 3N3Q | 2VD9 |
| 4APS | 4B0Z | 4GGK | 1SG9 | 3D00 | 2AVD | 2WGI | 1N3L | 4F0B | 1MH9 |
| 2C7T | 2WEU | 1USR | 3FGV | 3LPL | 2G5G | 1FVF | 3CLQ | 2F5D | 3HMK |
| 2QRZ | 3M5P | 3U7S | 2GVI | 3E2M | 3HBQ | 3SB6 | 1TLB | 4AMI | 1N1B |
| 1Q2H | 3TR6 | 3GG9 | 2ZYA | 3IS2 | 1REI | 2JJH | 2ZXL | 4DQN | 3JUW |
| 2BDR | 2CUK | 2R6F | 3BJ6 | 1SGM | 3CUK | 3R4Y | 3NPK | 4JV0 | 2XTY |

|      |      |      |      |      |      |      |      |      |      |
|------|------|------|------|------|------|------|------|------|------|
| 2Z7J | 1ARI | 2DCM | 3IEF | 2ZL7 | 2A8I | 2I10 | 1M6J | 2PAK | 2C76 |
| 1UZ3 | 3KJI | 2YVN | 1OUN | 3N6W | 1QPA | 3N05 | 3IA7 | 1YEA | 10YJ |
| 3ALE | 1PYD | 1NT0 | 1FVP | 2PIG | 4G79 | 2HMP | 3QH2 | 1NNW | 1E0R |
| 2VB0 | 1YB2 | 1ESR | 1MJV | 2QLZ | 3CWR | 2EKA | 3V7I | 3JY6 | 2FSW |
| 2Z2R | 3B7C | 1ZMB | 3L2B | 1VFR | 3SXW | 4FAC | 3E18 | 2RDY | 4JRH |
| 3Q0W | 1DKS | 2XQ2 | 3Q9B | 2QPT | 3S0N | 3ENU | 4AC8 | 3JSB | 3EHE |
| 3UB3 | 1VG3 | 1QAK | 20M0 | 1H91 | 2ARZ | 2IJK | 3EPN | 1Z91 | 3Q7R |
| 1PDZ | 20D4 | 2QKP | 1XCP | 3DCA | 2XSA | 3FK4 | 3DTN | 2PB6 | 1VQV |
| 4IMX | 30N6 | 3QA0 | 4D05 | 2X52 | 1T3C | 4BFX | 2IK7 | 2ZGT | 3ASB |
| 3Q0K | 2IY2 | 1HZJ | 1XPQ | 3H4L | 1EWJ | 1SZ3 | 4DQH | 4DVD | 4EIA |
| 3UHR | 17GS | 2GYR | 1FF5 | 30LT | 1EV4 | 4B4W | 4FE4 | 3AI7 | 1RCW |
| 4E70 | 2RGH | 2V8D | 2PWJ | 2QAK | 2EEN | 2CAN | 1NK1 | 1DJC | 1WRP |
| 2W8M | 2F3G | 2HOW | 3S52 | 2P0K | 1ALU | 3GX0 | 1WR8 | 1ANI | 10IV |
| 3ZXI | 4FWR | 2XH7 | 1K26 | 2Z0F | 4F80 | 3MWH | 1CJ3 | 3EJ8 | 2EPK |
| 1BWP | 3QD0 | 3AQI | 1HUL | 2CBF | 2V00 | 3FQQ | 10BQ | 1V84 | 2B48 |
| 3DEE | 2VPR | 3D7Q | 3N2I | 3L8J | 20KF | 3FKQ | 1G3W | 1JDN | 2IU5 |
| 2R3X | 2JJ7 | 4EZF | 3HJ9 | 1CDO | 1RMD | 2A8X | 4AW2 | 3NAU | 3B09 |
| 2E4R | 2ZTK | 3AUA | 2BH9 | 30C0 | 3P04 | 2YRF | 3KE3 | 4JZY | 4E0A |
| 1HT9 | 3LXY | 3FD4 | 1DD8 | 1V3V | 2DQ3 | 2W8X | 2AUN | 2VMX | 1VKH |
| 3U9I | 3EXA | 2GE7 | 3JV0 | 4G9M | 2D5M | 1J0P | 2WTE | 2CMG | 3VC5 |
| 1DDX | 1K3E | 3C24 | 2FB0 | 1TEL | 1R15 | 3HYB | 3QEZ | 2FB9 | 2JKE |
| 1V0D | 3MD0 | 4DJ2 | 2QAE | 3C3P | 3ZT5 | 3U2T | 1ZH1 | 2DJL | 3CGB |
| 3PNK | 10DY | 2V0C | 2QIQ | 3U4A | 2JKZ | 3HVP | 1D6H | 4IFF | 1TU1 |
| 1I13 | 3I83 | 2HS1 | 4H7L | 2NWV | 3COL | 2DJZ | 2ZZ8 | 1M2D | 1EHI |
| 1H0C | 1ZG3 | 4A7X | 3LOC | 2Q6Z | 2QLD | 1GEU | 2JC6 | 3PSW | 3A32 |
| 4E08 | 2QUD | 1K6Z | 1FS9 | 1INJ | 2PLJ | 4DKC | 1ZK8 | 1BE0 | 3KV1 |
| 2CL8 | 3HZB | 1F4D | 3U4F | 2QNL | 1QX3 | 1T9M | 2DDC | 1WL3 | 3GWN |
| 1TIK | 1D6S | 2V8V | 1PM3 | 1JVD | 3DQP | 3M3E | 1UUR | 3I4T | 1VJL |
| 1NRX | 2ODF | 4L7W | 2B20 | 3LTB | 2Y3M | 3SY5 | 1ASF | 2W90 | 3MJQ |
| 2H0H | 2JLH | 3V3X | 1I0L | 2WGK | 3DR2 | 2YK7 | 3AH7 | 2E80 | 2Y39 |
| 1YSL | 2X9M | 1HJR | 1RR2 | 3KSP | 3OWA | 1HSI | 3I6M | 2DHT | 4FZR |
| 3LY7 | 3AGC | 3SLB | 3CJY | 3FLC | 1J6W | 1ERN | 3G13 | 3TW4 | 1KPB |
| 3NQN | 1PA0 | 3A3X | 1XE7 | 1RCQ | 1NWP | 2ZD0 | 3AHC | 2BYW | 3UMC |
| 2V7S | 2X2M | 3FY3 | 3EBN | 4IC2 | 3F6C | 3DYQ | 3HHV | 30KX | 30U6 |
| 1AFW | 4ES3 | 3EZ3 | 1PEU | 2FC1 | 3KWK | 20KV | 2Y4N | 3TJL | 2QUI |
| 2HG4 | 3L5L | 1ZC6 | 3KKY | 2QQB | 1LMK | 1V7R | 4J4C | 1GY5 | 2PVP |
| 4GI7 | 1R28 | 2RKB | 3QAE | 3ENK | 3A9I | 2HZB | 3JX9 | 2H09 | 1S99 |
| 2Z7C | 1K6C | 3HSY | 4KMR | 1P4K | 3L19 | 1H94 | 1GR0 | 3QBM | 1M1M |
| 1JFL | 1B62 | 3KAY | 4FIS | 1L0L | 30II | 3AHI | 3K2H | 3D7L | 2H2Q |
| 4B04 | 4E28 | 3T1S | 2HRZ | 1W01 | 3CC8 | 4HHE | 3N65 | 1B74 | 3QJ0 |
| 1L3P | 1JR9 | 2WFD | 4AXL | 3UM9 | 1CG4 | 3URH | 3H1P | 2GK9 | 3U5V |
| 2QCW | 3VQE | 3BKX | 1M99 | 3RMJ | 4IYJ | 3KZB | 3SSA | 3C64 | 2YCK |
| 1U7N | 3027 | 3FX7 | 3BJA | 2HF9 | 1CN0 | 1ML6 | 2XB5 | 3BF5 | 2G7L |
| 2W8W | 3NYS | 1Y4J | 3N9W | 30ZW | 4GPI | 3KRK | 3KPC | 1G8Q | 1VM7 |
| 1XWG | 3EZ1 | 1YQX | 1BYK | 2VCY | 2BDQ | 2HQ9 | 1W8I | 4DZA | 3CM3 |
| 3NVU | 4AYN | 1WPY | 1TUV | 2F1L | 3PC0 | 1PDO | 1K04 | 3QXX | 2WKY |
| 2QYZ | 4IST | 3NQA | 1ZHQ | 3HGQ | 3F7L | 4K7Z | 4E70 | 3E2C | 4HC4 |
| 1CMV | 4AVM | 3ILX | 2BSJ | 3DAG | 2VJ0 | 2W31 | 4JJI | 1N7Z | 1GZ6 |
| 2RBB | 2XZ9 | 3UGS | 3LUS | 3FWN | 2RAI | 4KNA | 20AD | 3DY6 | 3I42 |
| 2XL8 | 2P04 | 2G36 | 3GEH | 3H2Q | 4DNG | 4AWY | 2Q9R | 4GH6 | 1SH9 |
| 2F7S | 3TL9 | 3KBF | 4GDH | 4F2C | 3090 | 1CGZ | 2G76 | 3EGT | 2D2R |
| 1RTS | 1SD7 | 1XA0 | 3N4S | 306D | 3G7P | 3LC8 | 3HI0 | 20QR | 1XTY |
| 3FIW | 2WQW | 3LII | 2E46 | 2EHP | 2Q58 | 1K51 | 3DJ6 | 2Z9A | 3DDS |
| 3FK9 | 3IGH | 1V7W | 3BWN | 1Y0B | 3LV9 | 1K3S | 3I05 | 3GIU | 2FZE |
| 1NE8 | 1G0Z | 3DT3 | 1SMA | 2QMX | 3EEQ | 2R27 | 2QHL | 1VI2 | 1SMS |
| 2G3P | 3VK6 | 3FRQ | 1H0X | 3ECD | 4CTS | 20BN | 1NU3 | 2F83 | 1WZ7 |
| 3TJT | 3FM2 | 2EH3 | 3NNR | 3CU3 | 1DJ2 | 3ZJJ | 4JC5 | 2ACA | 30P2 |
| 2EFJ | 3NXS | 2IMN | 201Z | 2WCR | 2QGH | 4A8Z | 3KF0 | 1DNL | 1KBN |
| 4D03 | 3INQ | 3DI4 | 3C2S | 2Q8R | 2IEA | 4FUW | 2XCC | 2XRE | 4J29 |
| 3BDE | 2ELD | 3S6T | 3SN9 | 1NXU | 20P9 | 1SAW | 2WZJ | 1WWP | 20L5 |

|      |      |      |      |      |      |      |      |      |      |
|------|------|------|------|------|------|------|------|------|------|
| 1HDR | 2BHM | 3GB6 | 3D0Z | 2P5U | 3VS9 | 3KDA | 3T8E | 3GW4 | 1BV7 |
| 2FN1 | 2YPR | 3C34 | 2F8D | 2PL7 | 2EV4 | 2W2B | 3H2D | 2FTZ | 1QKU |
| 2EFV | 4D8T | 2A1S | 3EZS | 2RH7 | 2IPR | 2ZF3 | 1VZ8 | 1JRC | 3ISX |
| 2V27 | 1Z4P | 1ULH | 109N | 2GFP | 302I | 4I1L | 1TE2 | 4A5Z | 4I66 |
| 1ZOR | 3LFL | 4AG0 | 20GS | 4D9M | 2B61 | 2V5G | 4DIR | 20WL | 1GXX |
| 1NF0 | 3D5F | 1VJB | 3MP3 | 3DJA | 3DNH | 2BP1 | 2Y0P | 3H05 | 3L3B |
| 1GCJ | 1I0I | 3M1Y | 3HCM | 1EWR | 2I1I | 3C3W | 2BC0 | 4EQ1 | 3CTP |
| 2ZCW | 3HJX | 3IKL | 1J1A | 3BM5 | 3E5Y | 2QRR | 2PS6 | 30CQ | 4GW9 |
| 2Z0Z | 1R4F | 3SEY | 3DNX | 3E03 | 1PGJ | 2ELB | 3BE0 | 1NX2 | 1PN4 |
| 1Y0H | 1GNN | 1IPI | 1NDA | 1LRL | 3HTR | 3P0R | 3BDR | 2ZGQ | 1Z85 |
| 2FYI | 1BZ0 | 4ACS | 3FGE | 3S46 | 1VGZ | 1IUB | 2XV7 | 2Y4R | 1GKD |
| 3SPX | 2GAN | 1PMT | 2J9H | 3DPM | 3CXY | 2FXV | 4B6I | 2BH0 | 3LTX |
| 1H7X | 2E04 | 2P1F | 1QU4 | 2EW2 | 1VGU | 3ICA | 3KXD | 1ETY | 3H0N |
| 2A88 | 2WWR | 5CSM | 1KWS | 1AIL | 2A6C | 3TGV | 4EUU | 1BIZ | 1U6L |
| 1H4V | 2IN5 | 4GAK | 2JL4 | 3PPU | 2Q82 | 2XWX | 1DJL | 3G7I | 3PJZ |
| 3PJ0 | 1IE0 | 1E98 | 2P8G | 2WQD | 3T5D | 1GUP | 2DVY | 1I08 | 2QFR |
| 3QM0 | 100W | 1EK5 | 1DK8 | 109E | 2A11 | 5ENL | 1VG2 | 2NZ0 | 3NQG |
| 3DWI | 4E1P | 2I8D | 3RU7 | 2X0D | 3KBX | 2H2B | 2E1H | 3Q8W | 1R8G |
| 1G07 | 1LL0 | 3ZYE | 3ZFB | 2NYI | 2HI1 | 3BM1 | 1IAZ | 4FMR | 1WGJ |
| 3CT8 | 3W4Y | 1P60 | 2I46 | 1TT4 | 2R1V | 1SZ7 | 2B67 | 1VH9 | 3C8X |
| 3JS3 | 3HJG | 2NYR | 3C08 | 3FCR | 3VPZ | 1QWD | 10VD | 3BRQ | 3FRG |
| 1IED | 3PM8 | 4GZE | 3F3Z | 2HUL | 2Z0F | 1R0S | 2CK0 | 2PFW | 1VH6 |
| 1Z68 | 1RIB | 3BXF | 1VHG | 2NRC | 2QYG | 1XZ8 | 4BA0 | 3NH8 | 3TG3 |
| 3VH1 | 3H5Q | 2GFN | 3SZ3 | 1PF0 | 30IT | 1THF | 4EIV | 1RVE | 1C0N |
| 3HTV | 2FBH | 2WV1 | 3P3A | 2R38 | 1Y0G | 5CTS | 1W5F | 3E26 | 3U55 |
| 1BT4 | 1U07 | 2P35 | 3NE8 | 4IUJ | 3ZJH | 2NOV | 2FA5 | 2IIM | 3E2Y |
| 2UV6 | 1BL5 | 1VIU | 3B9G | 2C0Z | 2FBK | 3DEU | 2DG6 | 3I1J | 3F6T |
| 1PVM | 4FHT | 3IH3 | 2BQQ | 2NSN | 3E08 | 1VZV | 1NWW | 2FRH | 3EZF |
| 1DMM | 2WFN | 3I64 | 3TQV | 2ECF | 2IIR | 4L59 | 1F36 | 1QMA | 1ZRS |
| 3FGG | 3HAJ | 3MHX | 1U4M | 1SW0 | 2D7V | 3HB8 | 1G3Y | 3U5W | 1N1C |
| 4AV7 | 1P6B | 2FVZ | 2ELE | 3052 | 1E7D | 2Z07 | 3BL4 | 2JLJ | 3PPL |
| 1EVJ | 2QUQ | 1CBK | 2WV0 | 1JHC | 1KVQ | 4HK4 | 1WLH | 1TUW | 4H8A |
| 3GLZ | 3QZZ | 4FH7 | 3LX7 | 1AY2 | 2FJT | 2X5R | 2YK4 | 2P9M | 30I8 |
| 3F2I | 20B3 | 1TPV | 2WSM | 1P9B | 3TZE | 1X7N | 2VUH | 2J70 | 3K41 |
| 1Z3A | 2XXU | 1H1Z | 2WY0 | 2PS4 | 1HYU | 3B5G | 2HAH | 2ZE3 | 3BBR |
| 2E0K | 1UZR | 1V25 | 2H3D | 4FGW | 3GLB | 4FEI | 1BIH | 2CB0 | 3BB5 |
| 4E74 | 3G17 | 30MT | 2W8T | 1TW7 | 2WU8 | 1KHZ | 1LJ9 | 3PNU | 3BJD |
| 3K8J | 1G85 | 1LRH | 3TG0 | 2YKF | 2ABJ | 3GPV | 2GFV | 3PFH | 3LM6 |
| 2P25 | 4DGT | 3F41 | 3DJW | 2PHN | 1KJI | 1VC1 | 3NP7 | 4GE0 | 1B0X |
| 20M6 | 1U0E | 1DPM | 2FOR | 1G8E | 1BBU | 3EVV | 3H3H | 2AK0 | 3GZQ |
| 3NQ0 | 1ZVF | 1DWI | 1GT5 | 3VJZ | 2E68 | 3TZA | 104U | 3G6I | 3F8B |
| 3TE8 | 20AM | 1QLV | 1UI6 | 3LWS | 3LI0 | 1LYN | 3IF2 | 1H65 | 3BBY |
| 2AEJ | 1IDE | 3FGH | 2Z29 | 3LBY | 1KLL | 5P2P | 3F1B | 3TCS | 3QH9 |
| 2DQR | 1BMD | 3HY8 | 3M3S | 3ETC | 2H63 | 1EA2 | 1NQD | 2PYT | 3B3L |
| 4DN2 | 1POC | 3AKJ | 1T0K | 3G8K | 2YWV | 3NM2 | 4B3A | 2B0A | 3V1P |
| 2C4M | 1EI5 | 1ANJ | 1E6B | 1ZYB | 3K94 | 3FBT | 3GUW | 2P05 | 3VJM |
| 2Z6E | 3DUV | 3RFC | 3ERS | 3KSU | 3MMS | 2GHV | 3AMZ | 2Y6A | 1U7X |
| 2YC3 | 4GD0 | 3T4K | 1SU5 | 2PBR | 3EIA | 3TY5 | 3C0S | 1T5B | 2E54 |
| 3I0F | 1A1X | 2BC1 | 1LTE | 3CAX | 2QR4 | 2GXF | 1X56 | 2J8Z | 2C54 |
| 3VX3 | 3LZU | 2I0C | 3EFA | 1CBI | 2DVM | 2FC0 | 4DVJ | 2FD0 | 3SJF |
| 1AZ4 | 2JC3 | 1KHJ | 2GVJ | 3RQ3 | 1PZW | 4JIM | 3F9Q | 2EF8 | 2CG6 |
| 3HX8 | 2QHD | 3G3H | 3DV3 | 1G50 | 2GBT | 3TKA | 2ZGP | 1JRB | 2ZGK |
| 2J80 | 1T0E | 2AUA | 3PG6 | 4E5N | 3HBG | 10P8 | 3CS3 | 1JFG | 1A6I |
| 1N57 | 1NZI | 3GWQ | 2ZGN | 1HZY | 3ESF | 2G69 | 2J3M | 1KI3 | 2000 |
| 3KH0 | 3LU1 | 1AZT | 2RIL | 1PGP | 2W4E | 4E0H | 1Y7Y | 1I1H | 3ILW |
| 2BE0 | 3LMB | 4EWC | 2E85 | 3UEH | 1BM9 | 1AU1 | 2J6B | 2R4Y | 3E15 |
| 6CSC | 2I1K | 3GB3 | 20YC | 1KU5 | 1W6P | 1QIR | 2NVN | 1PSC | 1F3H |
| 2Z0D | 1UXL | 4FE2 | 3G3G | 3AG5 | 10AN | 4HFS | 4GCX | 3GM5 | 2PHM |
| 3FN4 | 3RNR | 4JDP | 302J | 3L12 | 3PR3 | 2ESR | 2W8Z | 1Y00 | 3Q8N |
| 3H0I | 2Q64 | 1AD4 | 3UHD | 3FK7 | 20KJ | 3C9T | 3CWC | 4HAF | 3LKI |

|      |      |      |      |      |      |      |       |      |      |
|------|------|------|------|------|------|------|-------|------|------|
| 1PXC | 3FMB | 3F0C | 1IMC | 4IVF | 4GFA | 1GJU | 4GI5  | 3M6D | 3D0F |
| 3RF7 | 2TDD | 3IL6 | 3NMP | 4EBF | 2PX7 | 3A5Q | 1DNA  | 1Q41 | 3TTE |
| 1SWV | 3R2V | 3AN1 | 3K69 | 1RC5 | 4K6A | 3MDL | 4HZ4  | 2ZGS | 4HXT |
| 4AL0 | 4JXK | 2DX8 | 4HEX | 3GRD | 4AS3 | 3Q20 | 3PVQ  | 1IYH | 1VPB |
| 1NPB | 1LOM | 3N00 | 2A4X | 3DZC | 1NJ8 | 1LBV | 1R11  | 20I2 | 4A50 |
| 1VGV | 6GSW | 4IG6 | 2CH5 | 1Y94 | 3G0R | 1DYU | 2V32  | 1ZB8 | 1MI8 |
| 2ISK | 1FEE | 3UCW | 3C0F | 4AGH | 3HQ6 | 1TFE | 1DF0  | 1I0M | 2DUM |
| 10AA | 1F0Y | 2I8B | 1ZJC | 1JVS | 3GUF | 2PCK | 1CX2  | 3L0H | 4JWT |
| 2XUR | 3GTF | 1BDQ | 3NSM | 3LNP | 4FW8 | 201V | 1F0C  | 4ET0 | 2CYA |
| 3BB0 | 1TWU | 4J10 | 2D0I | 2FXE | 4GYT | 4DYL | 1SHL  | 2DCJ | 1JDW |
| 3NFU | 3U95 | 1CSR | 2WJD | 30MV | 2DPL | 4J41 | 3CEX  | 4J0Q | 3GS3 |
| 1UB2 | 2IDL | 30Y2 | 2P92 | 1EMD | 4H8E | 4FJU | 2DQL  | 1DJQ | 3GYQ |
| 1FDW | 1PZM | 2W0W | 3NPF | 3NM8 | 3DSR | 2RBC | 2Y2J  | 3H6G | 3GX1 |
| 3UPT | 3V05 | 2DH5 | 3MIO | 3MAV | 3KYG | 3QJ5 | 3BCV  | 3FF6 | 2AVV |
| 1B8A | 1I89 | 3U3P | 2VKW | 1GSU | 3UF5 | 1UDV | 1RKV  | 1E7L | 3LD6 |
| 3VSY | 1YJG | 3W3J | 4E3W | 3HPX | 3EWX | 104T | 1JGM  | 2IK4 | 2FQ4 |
| 2EJC | 2Q8T | 3ZYX | 1TCX | 3IVR | 2I20 | 2X99 | 2FTR  | 2G0I | 1ICI |
| 20B5 | 3IP3 | 1QDB | 3DQR | 1KQC | 3EIK | 2HDB | 4GE3  | 1WUF | 2QZG |
| 3TAL | 3FBS | 3US3 | 3AQN | 3KXQ | 1X0V | 2FGU | 1MLY  | 2NQR | 3U80 |
| 3BNK | 1AJD | 2EIX | 3A1N | 1PUC | 3P5Z | 1GTU | 2G8X  | 1Q09 | 3TY9 |
| 2Z1T | 3EC9 | 4A0U | 10QU | 1VHM | 3EDP | 1UMU | 3HT5  | 2DM9 | 3L46 |
| 1ES9 | 3QS2 | 1ZKG | 1UB9 | 30E9 | 1JQ6 | 2BZ3 | 2IA9  | 4GP6 | 2YGK |
| 1BKP | 2NMY | 19HC | 1TYC | 2QGS | 1II7 | 2CZ5 | 2FLE  | 3TCM | 1QG3 |
| 3MND | 1AY0 | 3TLC | 3IR9 | 2ZZ4 | 3HNE | 1081 | 3D7A  | 1WLK | 3L1E |
| 1CZE | 1SP8 | 2R1I | 2GFF | 2R5N | 3HQ5 | 1PL1 | 3KAJ  | 3R6M | 3VH2 |
| 1Z7U | 1AB4 | 3CP7 | 3UCG | 1GMV | 20WM | 1MKK | 3TN0  | 3ZC0 | 3F9G |
| 2AUD | 1VKI | 1SQ7 | 2DC5 | 3G8E | 1JRQ | 2WND | 2I45  | 10CM | 1CSG |
| 1F2D | 3KRS | 3E6E | 3E0F | 1D0B | 2Q80 | 2GUP | 1TSW  | 3C8M | 3I2G |
| 3V0S | 1AIB | 4E5R | 3TB0 | 3GTX | 4BEZ | 3T7E | 3IUUV | 2VGZ | 3P6B |
| 2FC2 | 2IWY | 2Y21 | 3DYG | 1J85 | 1QJG | 2PQ7 | 1FLM  | 2Y2Z | 2EWN |
| 2027 | 3Q0Z | 1JXA | 3IL3 | 2IX4 | 7AAT | 1Y44 | 2R6K  | 2EVR | 2E6K |
| 2Z6D | 3JRT | 2F5T | 1GRT | 1GVI | 2NRF | 3EHJ | 4HMZ  | 4JVW | 3D4J |
| 1QXX | 3QGU | 3G3I | 3LHK | 1URB | 3BM7 | 2PEI | 2EG5  | 1GXF | 1VZD |
| 4GDP | 4EJQ | 2FBN | 1K4Z | 2QFV | 1ZXN | 4EVU | 3DLD  | 2095 | 1S0S |
| 4IR0 | 3EKQ | 3LG2 | 1P9N | 1JPI | 1BGN | 2AUW | 4INB  | 3RHG | 1CB4 |
| 1BW0 | 2WI8 | 3G27 | 4IDQ | 3KG8 | 1TSN | 1C1L | 2IM0  | 3E7S | 1K75 |
| 4F35 | 1SE8 | 4IXM | 1PS6 | 3R41 | 1Z4E | 1FF9 | 3BZH  | 3ANM | 1F18 |
| 3V0E | 2UY0 | 4BKP | 2X76 | 3LV6 | 1BZL | 4G2U | 2NSI  | 1DAA | 2FEX |
| 3CTA | 3NYL | 2ONT | 3BFM | 3KG0 | 2DSB | 1AAM | 2VDJ  | 1UBX | 3FL7 |
| 1F89 | 3CGU | 3GE6 | 2HDK | 3NU0 | 4EDZ | 2VRB | 3LLM  | 2V40 | 3NET |
| 2Y1H | 3QFM | 1G4V | 1PXX | 3UWW | 2YWA | 4DEC | 4AA0  | 3FKH | 1XMA |
| 3N6C | 4IM3 | 1XP9 | 1RKY | 3CB2 | 4FIN | 3A8S | 2GWG  | 1SNN | 1TB4 |
| 1CKJ | 3UCD | 3QW3 | 3D8U | 10GB | 3MAH | 3UHK | 2ZXF  | 4EBK | 1069 |
| 1E8A | 1ZRL | 4F07 | 4BI6 | 2HGZ | 3NJB | 3GFG | 2QMA  | 3H9Z | 3LRY |
| 4ESF | 2FIU | 3Q7D | 1X0A | 3KLO | 4DLK | 3RSY | 3LPQ  | 2Y6U | 4IRY |
| 3SR3 | 3GR3 | 1NRI | 3GH6 | 1VA0 | 1A05 | 3VP0 | 2YLI  | 1Q7G | 4HWX |
| 2A8M | 1HTB | 2P0U | 2A62 | 1LSJ | 1NMQ | 200E | 1B78  | 1W5X | 3B8T |
| 1JPK | 4ESY | 1CX8 | 1PYP | 3M4I | 3CAN | 2Q13 | 1Q6U  | 1HWR | 2QIF |
| 2GHR | 2C03 | 1HE7 | 3NGX | 3NA2 | 2Q50 | 3HDG | 2E5W  | 2Z99 | 1JHD |
| 2H05 | 3CSI | 3FRL | 2IFA | 3NPI | 3I27 | 3AI0 | 2VXY  | 1Q47 | 3RMG |
| 3L24 | 2QJ2 | 3KK4 | 2EGH | 1WYZ | 1R9C | 3BMP | 1D9G  | 3NUA | 3UA8 |
| 4AHN | 3HKP | 1SFT | 2HZT | 1KIC | 4J5U | 3E02 | 3NNT  | 2GHY | 2ZQ0 |
| 3I7D | 1IQ8 | 3KGX | 2JK6 | 2QS1 | 1GPR | 4A27 | 1DR0  | 4ILR | 2P0V |
| 3EDV | 2E1N | 1HQA | 4FX6 | 4EXR | 3KXS | 2Z0N | 3NJ0  | 1Q50 | 1QV7 |
| 3LQ2 | 1ISR | 3T0K | 2ISY | 20FX | 4G1T | 3B1B | 3MI2  | 1JQV | 3QFV |
| 10H0 | 2FA1 | 3LYP | 2YVS | 4D00 | 3GZR | 308S | 3E80  | 3BXX | 3TR2 |
| 3NOR | 3NQD | 4E6W | 2CWE | 3DGR | 3MCP | 1SUR | 1AZ3  | 3M7W | 3LV5 |
| 1DBS | 3V76 | 3Q20 | 2PEJ | 3LM9 | 3L44 | 3L6U | 1WXI  | 1CP2 | 2Z0V |
| 4EMW | 3QFL | 3JZD | 3IN1 | 3S8I | 2ASR | 3PUM | 2IEK  | 2PNJ | 1EGA |
| 1S9A | 2NS7 |      |      |      |      |      |       |      |      |

**Table 9. List of PDB IDs of all monomers (Test-set 1)**

|      |      |      |      |      |      |      |      |      |      |
|------|------|------|------|------|------|------|------|------|------|
| 2AP3 | 1I2T | 1MN1 | 3TNE | 4I8M | 2XUU | 3L6T | 3E7W | 3E66 | 2Y1M |
| 2R5V | 4AKQ | 2H7R | 4GR5 | 2B1M | 1DKQ | 2YLK | 3IGZ | 2HF3 | 2W0Y |
| 3FND | 3BFX | 3DDY | 3QKP | 4IJD | 4F5V | 4GRI | 1VYI | 1GFK | 209L |
| 3P2D | 2HZ9 | 3FCI | 4FD4 | 3KHZ | 4HN9 | 1M7X | 3KFV | 228L | 1HVC |
| 4HS1 | 2PC9 | 1EZF | 2A5J | 1MWP | 3UT3 | 4AZI | 1N7R | 1RLR | 2YV8 |
| 2YFP | 2FK9 | 1GV7 | 1PQD | 3BLM | 3HIQ | 2HD9 | 3SKS | 1ZJA | 1M8R |
| 2PSH | 2J7U | 4HVS | 2VK2 | 1SI5 | 2YRX | 2JCK | 3L5A | 3W4S | 3FSS |
| 3SEE | 4GHN | 30BE | 3V16 | 3FFX | 2PLT | 2VDT | 3KRG | 2DH2 | 3GR0 |
| 2BIM | 2NXB | 1P36 | 1013 | 1PQK | 3VMA | 3VUP | 1WSF | 3I80 | 2HF2 |
| 1BSA | 3GF0 | 1H9N | 4GZU | 1QGQ | 3FFA | 1TRP | 1IHG | 3CUC | 1SJ8 |
| 4G1B | 3TJM | 3HW5 | 1BXE | 1D03 | 3HX1 | 1W9S | 2WXF | 2GCJ | 3VXJ |
| 3PAM | 1XKS | 2WBC | 3S7Q | 2CYJ | 10KQ | 3PST | 4A0H | 2XLL | 3UYC |
| 1P90 | 2V1F | 2PVB | 2XVV | 3UQV | 1GBG | 20PE | 2QZ5 | 1L2H | 30FS |
| 1I4G | 4D8H | 4K2R | 1XQD | 3ELW | 3NKV | 3SLT | 2EIF | 3C37 | 2P86 |
| 4EEW | 2EFG | 4EPV | 1YU0 | 3C10 | 4KY7 | 10BR | 1YQB | 4HT2 | 2I9C |
| 2CAK | 4G1J | 2B90 | 2Q0Z | 1H4E | 3CNH | 1LHY | 20E0 | 1KGU | 2C9A |
| 2HQZ | 2BXR | 1XZJ | 3UV5 | 3RM3 | 3CU4 | 3SV6 | 20IQ | 2I53 | 1T32 |
| 4H4D | 4DWF | 1G0K | 1PF3 | 3PZ0 | 1B56 | 3KEP | 2BUP | 2IAV | 4EZE |
| 3U9J | 3ETW | 3GK5 | 1N41 | 2E1B | 1ME0 | 3TEJ | 1FYA | 2ZP2 | 3DBG |
| 1U0W | 3NYV | 3G5D | 2VVK | 1JKA | 2WJH | 20YP | 107Q | 3IKW | 1Y9R |
| 4G8C | 1DGK | 2ZPD | 4GYI | 2UVG | 2Z6V | 30M2 | 20QA | 4ICA | 3K1U |
| 2V4U | 2IL5 | 2NRR | 2ELF | 3BNB | 4FNE | 2052 | 1MN2 | 3Q53 | 2BS7 |



|      |      |      |      |      |      |      |      |      |      |
|------|------|------|------|------|------|------|------|------|------|
| 1LYJ | 1SM4 | 3EFR | 1GEQ | 3QNM | 3UZJ | 2QPM | 3TFD | 3F4R | 1UIF |
| 1EUT | 1T27 | 1AKT | 2XWH | 3PPS | 3GHP | 105U | 3ERH | 2XRB | 3VIS |
| 2WGX | 175L | 20TT | 3NMW | 3S0I | 1H0B | 3T7L | 1L72 | 1FR7 | 2YDL |
| 3M6B | 1N1F | 2A6Y | 2WCP | 3DAJ | 1K3I | 3GFC | 100R | 3QSD | 1EPU |
| 3SC7 | 3I6C | 2J44 | 20CS | 1JQU | 3C0H | 1ZV4 | 3HBK | 4DJA | 1QW0 |
| 1EE6 | 4HY4 | 3FZI | 1L38 | 1RPM | 1PNE | 2X0V | 2PG6 | 205L | 2AHE |
| 1QQN | 1QHW | 2XMF | 4BGP | 2Y8B | 4ETR | 3K7L | 3LJP | 1FY1 | 1PZ1 |
| 3S98 | 1R0A | 1IJT | 3ZFP | 1FMJ | 3BS2 | 1CY2 | 1G7S | 3AA3 | 1U0K |
| 1C40 | 1CTY | 1FLW | 3QP9 | 1SHM | 1H14 | 1QW0 | 1A7S | 3S7B | 3GDZ |
| 2FYG | 1F82 | 3F6P | 1KF3 | 202T | 1EQP | 3MNJ | 3EBX | 4AFP | 2WV2 |
| 4EQ9 | 4IBX | 1RFJ | 1F9H | 2A2K | 3RXW | 2IBN | 2X49 | 4K8J | 107L |
| 3BT5 | 2GZQ | 1AVS | 1SYB | 1VG1 | 1AUN | 1XG8 | 180L | 4D0T | 3A4G |
| 1XCR | 3UEN | 2PLC | 4EC3 | 1DY6 | 1DPE | 4A71 | 3H1F | 1AMX | 2Q4U |
| 2FSQ | 3HRE | 1FSL | 1U24 | 4B2F | 3EBK | 1PAQ | 1QTF | 1B6E | 2B0Q |
| 4H3W | 3DVW | 1ZCN | 1JA1 | 1D9Z | 3GMV | 3TP7 | 1MJ0 | 3ZLY | 1RGY |
| 1L08 | 2VH1 | 3R0M | 1YPR | 3ACX | 2HAZ | 1AC5 | 2HCT | 1VYU | 4G22 |
| 4AII | 3VIU | 1RAJ | 2V5N | 2IJE | 3MW8 | 3R27 | 3NGF | 3HQC | 3K1D |
| 1L0I | 2ANW | 1IIZ | 2QFQ | 2W5A | 4DQ0 | 3PAE | 2QSB | 3ABB | 4G4I |
| 1FHF | 3CQV | 2R0S | 1IR7 | 4GIG | 3UNG | 1AEC | 1GRJ | 3IIX | 2XSK |
| 2XXL | 1UAS | 2YV1 | 2JHQ | 1WER | 3B72 | 3T3Q | 3JUI | 1ZJK | 4JCJ |
| 3K8U | 4F1V | 4F0I | 3TQS | 1QUD | 4EER | 2J1L | 1MC2 | 3KCM | 1V07 |
| 30BS | 2FN9 | 1T8H | 4HH0 | 2C95 | 1HQZ | 3RFS | 2XMZ | 3LH9 | 2BQJ |
| 3NB8 | 3P0Y | 3UEK | 1XZZ | 3FMU | 1LZ5 | 3TRK | 3DMQ | 3IVY | 1HN0 |
| 1BWL | 2JG0 | 1W28 | 1JSX | 2H1N | 4H6Y | 2Z0Q | 1Y80 | 1SYG | 3QJY |
| 1GTT | 1X46 | 1PRY | 1ZJ9 | 30BR | 3JYS | 20H4 | 4IL7 | 2ETD | 3AKY |
| 2NSG | 3BFF | 4G39 | 3ET9 | 3JPY | 3S0R | 3SLA | 4GLM | 1TN4 | 3PQU |
| 1KUF | 1VBJ | 2F08 | 4FBH | 2AU3 | 3B0X | 4BC3 | 1CCT | 1XYZ | 1F9P |
| 3MJX | 1P3N | 3T0Q | 4ETK | 1ZSQ | 3ZYG | 3QFI | 3003 | 1THG | 1M7U |
| 1RRH | 3U25 | 3DI5 | 3W2P | 1HFZ | 3CEU | 3KSX | 2V4X | 1NGA | 1MZA |
| 3UD1 | 2QY1 | 2W56 | 1BVA | 2PB0 | 1QWY | 2AHN | 2E0I | 4GH8 | 3VAC |
| 4D0I | 1W5E | 1W94 | 3MC8 | 4EWE | 3MXZ | 3C5V | 1L06 | 2FU2 | 4E22 |
| 1E70 | 3UXD | 3ZT9 | 1IQ9 | 1VLB | 1GF4 | 3RIX | 1DBH | 3N0W | 3KR6 |
| 2WW5 | 3GMS | 1M6T | 1UKZ | 1YR2 | 2YE0 | 1JND | 2YZY | 3N0A | 7PTD |
| 3E0X | 2WHF | 1AJ6 | 1TIG | 1N6P | 4F25 | 3UUG | 4FID | 4DNJ | 4G0Q |
| 2DG4 | 3MYV | 3VKL | 1IS9 | 1W0M | 1KKH | 4FRV | 1AK0 | 3FNI | 4JGF |
| 3QHP | 2X18 | 1ZYL | 1DC9 | 3QC1 | 3SP7 | 2XSE | 4ID6 | 1YZ7 | 4PEP |
| 1RL0 | 2ZTB | 2WT8 | 1U2C | 2HKD | 4GKL | 3C5C | 2P8T | 3D7C | 1DMG |
| 2YWE | 3E23 | 1JXG | 3K7N | 3PPT | 10H4 | 3A2J | 1YD9 | 3DHJ | 2R75 |
| 2PW5 | 3FME | 2DKK | 1YXH | 2CNS | 30ZQ | 1ACX | 1RJD | 3W0F | 30HG |
| 1P3R | 2J4X | 1FC9 | 2D0B | 3I65 | 3TVN | 3D3U | 3RYS | 4FFE | 1Y4K |
| 3TI9 | 1SZW | 3GFT | 4F0F | 3EY6 | 3SVZ | 2LHB | 1CP5 | 1DM1 | 1FCY |
| 3AFL | 3UGR | 4D07 | 2CHD | 2RHF | 4GZD | 2C03 | 2XSB | 3HB1 | 1H75 |
| 1L18 | 4GZJ | 2J8G | 1GYD | 3C7X | 1UZE | 3V02 | 3FSW | 2F1Z | 10VT |
| 1BSC | 1F9B | 2BAB | 4E20 | 2GX2 | 2VPI | 2XJV | 2I69 | 1A76 | 1LF7 |
| 1HT3 | 1VBW | 1LAW | 3C96 | 1YD5 | 1FRJ | 2HWY | 1CTQ | 2DQX | 2A10 |
| 1BPD | 3PNN | 1K9B | 3U0S | 1M2I | 1ULR | 3E46 | 1ES0 | 3I9H | 1I39 |
| 3NEC | 1L85 | 3V1H | 3S8Z | 3FI5 | 4I5I | 4FUU | 3C0I | 3QV2 | 3MNK |
| 30DY | 1CC3 | 4I1I | 1B1C | 3MKD | 1I8N | 2QDX | 3G0Z | 3LIE | 2HX7 |
| 1S68 | 2I0S | 4KHM | 4B3X | 2CE0 | 1DTU | 1D3N | 3RED | 2AMH | 2I5H |
| 1BY0 | 3MX7 | 3U3R | 4BHB | 1WDV | 1CE0 | 30SD | 2Y0R | 4GL0 | 1ZGD |
| 3PDD | 3V2T | 1H85 | 20T9 | 1L79 | 3VGI | 3A0T | 2QVT | 1WM5 | 1JP4 |
| 1VIN | 2G3Y | 10FJ | 3AV4 | 3FS5 | 1QPC | 3QXM | 2CJJ | 1XDZ | 2Y4M |
| 1CRI | 2VZS | 1A41 | 3TLQ | 4GWI | 1XF8 | 1XDY | 2QZQ | 220L | 3FSM |
| 1V77 | 3MZZ | 2B7R | 4H3N | 3BHY | 1KAF | 2001 | 1UXY | 7ATJ | 2NTD |
| 3RFU | 1KU1 | 2CXF | 3QQZ | 20Z0 | 1CU0 | 1D0T | 1Q3X | 1A2B | 1RB9 |
| 2Z1P | 3DSK | 3TDV | 3BF7 | 1FF2 | 3CMV | 1YHI | 3BY0 | 3081 | 10WL |
| 1QF0 | 4E0C | 1WRJ | 2DDR | 4E2U | 2P4U | 2PWW | 1I4W | 4AM6 | 3EIJ |
| 2Y5C | 3R9C | 3G5S | 4H4J | 2Z0X | 1MNI | 3EHR | 189L | 109L | 2QMQ |
| 2FWT | 3M8B | 1NR0 | 2FNA | 30DN | 1Y4C | 4EQN | 2IHD | 2F24 | 1C8Y |
| 1HXA | 1FRK | 1FVR | 3L0R | 1WZU | 1DY0 | 2RBO | 1YZY | 1KON | 4HTJ |

|      |      |      |      |      |      |      |      |      |      |
|------|------|------|------|------|------|------|------|------|------|
| 3ZWT | 3QBC | 3IFK | 1QWR | 201L | 3RJ6 | 4K8I | 2QZ6 | 3AUZ | 3KVG |
| 2IZR | 3RD2 | 1R76 | 2QED | 4J1E | 1DIN | 4ETN | 4DOX | 1NSA | 1HUQ |
| 1IZO | 20L8 | 4DCU | 3IAD | 2Y6Y | 2EYM | 4EKZ | 207A | 1C7I | 3M1H |
| 1XX2 | 1K5V | 1UPL | 1CKD | 205V | 1Z32 | 1VGJ | 4DQV | 1H43 | 3M4R |
| 20V0 | 1C5H | 3BQV | 1QDQ | 3V93 | 10SD | 2BIQ | 1M2M | 3HNY | 2X5Y |
| 3C2C | 4D0N | 2BIO | 3EVY | 4IYE | 1EQV | 1JI6 | 2RBK | 20Q0 | 4F1R |
| 1KTW | 2XVK | 1P6F | 1ET9 | 3MWZ | 2UWF | 1TBF | 1RLJ | 1LI0 | 1Z6G |
| 1BRJ | 1LM4 | 3TVY | 3PSH | 3ILI | 2DBY | 1C0E | 1RWI | 1IMJ | 3TZ0 |
| 1W96 | 2W5N | 3SIL | 3CSB | 1JNF | 2ZIB | 2R5G | 1BU8 | 3DHQ | 2Z0T |
| 1B8L | 1SGL | 2GC6 | 3SRE | 4GNR | 3066 | 3IXD | 1P6Y | 1B0F | 1XP3 |
| 2V0C | 4DTE | 3I3L | 1KTH | 4GMU | 3KHX | 3GT2 | 4B9J | 1QTS | 4KJ0 |
| 2IDC | 3VMV | 2JKB | 2VK9 | 1N7N | 2HIX | 2W6R | 1T46 | 1BX0 | 1LMT |
| 1VYD | 1QQE | 1FIK | 3JXS | 1JPD | 1BNL | 1ITX | 2PBG | 1JAL | 1NGN |
| 3ZKG | 2AWM | 2H14 | 2YY3 | 1CVE | 1UPV | 1VZ3 | 2JJD | 4AF6 | 1Q6G |
| 1HK0 | 4GH9 | 2CX1 | 2EIB | 1N7X | 1AGI | 2EU8 | 4EE2 | 2FZP | 4E6Q |
| 2DSN | 3TE4 | 30G2 | 1KK1 | 1IXK | 1UGN | 1E6G | 4KF7 | 1FFA | 3PLQ |
| 3VDZ | 3PIT | 1EUR | 1WU0 | 1AKL | 4G30 | 300K | 3N0U | 3QEF | 3NED |
| 3EWR | 3MLH | 4L83 | 1OUI | 1KW4 | 1Q0Z | 3LPD | 1TEF | 2FCB | 3N5N |
| 4DUH | 1UGF | 2PIC | 3IMK | 2WJR | 1A7H | 3ZUZ | 1Q5P | 1QAU | 1S2M |
| 1JVY | 2Q3Q | 2UVE | 3TME | 1EFQ | 2FPQ | 1JSE | 1Q5Z | 2VN4 | 2ERF |
| 3CIV | 4IUS | 1J2F | 3F7M | 1E6N | 10UE | 1FL0 | 1WQN | 2CVE | 2J7V |
| 3BA9 | 3RVC | 1DTX | 2ZPS | 1ZVD | 1QCY | 2HFC | 3SZY | 166L | 3GT7 |
| 20LW | 3RRU | 3NTK | 1GAW | 3KEV | 1F2F | 4DI5 | 3I7M | 4AI5 | 3RLE |
| 2RDI | 1U59 | 3NSW | 3BZ6 | 2Z4U | 1Q2Y | 2IAW | 3C5K | 2XWG | 1IHZ |
| 3U4Y | 4HHJ | 3FW9 | 3E0E | 1AUQ | 4AHJ | 1CNK | 2C0M | 3ZSJ | 1W2V |
| 1BMG | 1UEK | 1VJ7 | 1Q6V | 1RQ5 | 1MCY | 4APC | 2ZEQ | 2A6S | 3TGL |
| 1GD6 | 3EXM | 2F00 | 3GGY | 2D80 | 1ZY9 | 2WJS | 3HSM | 2I5F | 1I7H |
| 2FNK | 1L02 | 1ZIR | 1DGM | 2YD3 | 3DDD | 3RKV | 3PH9 | 4EES | 1GB7 |
| 1VMO | 2WZG | 3N4Z | 1BX0 | 1IQV | 2ZR9 | 3SG0 | 3SBM | 3KHI | 4EHX |
| 3TRD | 2YFU | 2BIN | 3KFF | 3VBC | 1EBE | 4J0X | 2H30 | 4G0S | 1GHM |
| 3DH8 | 4GPV | 2XMQ | 3ORH | 3UTN | 3K4Q | 3APU | 4E55 | 2A1I | 3GXR |
| 1XK3 | 3L9U | 4F2T | 3M7T | 1UUM | 20QF | 3UFC | 1UUE | 30FT | 2007 |
| 1PP0 | 1LQX | 3L0P | 1LKI | 3ZM8 | 1GQ4 | 3ATY | 2V70 | 2CY7 | 3014 |
| 3DJN | 4A6W | 1ND7 | 1U3G | 2JK0 | 3LXJ | 3SGG | 3SEN | 1E5T | 1C93 |
| 1R88 | 3K5J | 3CVB | 1LLH | 2BBW | 1LE4 | 3A5K | 2CCP | 3VJ7 | 1IFR |
| 2F3N | 2XD1 | 3PLK | 1MBL | 2QV7 | 1VLY | 3K0R | 3PXM | 4DHF | 4FKL |
| 3TR7 | 3KZZ | 1GHS | 30M5 | 4DKW | 3VG7 | 3QRJ | 1IJB | 30ES | 1SK7 |
| 1AJK | 3KM8 | 3QB8 | 1CZN | 1PT2 | 3EKF | 4I4E | 1KNG | 4JHN | 4E3Y |
| 3007 | 3UC4 | 4FG8 | 2PHZ | 2JKF | 3I2N | 3MPK | 1FRR | 2H0B | 4BL1 |
| 2QMT | 1CT5 | 2PPL | 2CPU | 1EXM | 3RRK | 2F8L | 1CRG | 1QXL | 30R5 |
| 1YVJ | 2I7V | 1IM5 | 3RCM | 3AE0 | 300S | 3BMX | 1D6M | 1U2B | 3U4T |
| 3D5W | 2QDB | 1BQE | 3W6D | 4G2G | 3B0J | 4AWZ | 3BWI | 3MPF | 3HYI |
| 1MOM | 3CGZ | 2Y00 | 3GQV | 2Q00 | 3NRE | 1UED | 3F3M | 1H2X | 236L |
| 1VYP | 4H3L | 3GGD | 2XC2 | 4FD8 | 3H1Q | 3S99 | 3PUA | 4DG8 | 3S0E |
| 2IUG | 1H2P | 4EMN | 4JV8 | 2RAL | 3ANR | 2F0E | 2B0D | 2VL8 | 3I7V |
| 3AAY | 3NF0 | 2Z5L | 4D0L | 3DMG | 3USH | 4FR9 | 2FT6 | 4AT5 | 1QT5 |
| 10FK | 2WFB | 1VL0 | 3I4W | 2D2E | 3DGK | 3P2E | 1Y08 | 3TP4 | 1MH1 |
| 2EYU | 2G02 | 1FM4 | 30RZ | 3GTA | 4AWM | 1A32 | 1YJE | 4H00 | 1N4K |
| 3R05 | 3ZIZ | 3HEP | 3B0G | 3DY5 | 4PTD | 2GMW | 3GBZ | 2Y4X | 1LUF |
| 1XM9 | 1HD5 | 2HLV | 3JS6 | 2NYV | 305N | 3TPA | 3ILS | 30VW | 2BQN |
| 2CWR | 2QBN | 1WD5 | 4E6F | 3RZU | 3QDA | 1WSI | 2ZVS | 2PU3 | 2V2E |
| 2R16 | 1LHL | 3AAP | 2QYJ | 3N35 | 1ZWZ | 2WSI | 4F92 | 1LCF | 2Y4T |
| 1VK2 | 3N9K | 3QGV | 1Y2G | 2WUR | 3CPF | 1YK4 | 4FU6 | 3QAH | 1PSZ |
| 1QAM | 3D66 | 1DVG | 1GV5 | 1V2Q | 1K5B | 4AR1 | 3BS0 | 2FU0 | 1XK1 |
| 1C9H | 2FSX | 2CKK | 2HAQ | 2IXT | 10DM | 3M19 | 1UJ8 | 1V9E | 2CW8 |
| 3I95 | 2BWQ | 4ZNB | 1HEB | 3IR4 | 1G1B | 1UH4 | 2CKW | 1R77 | 1PRZ |
| 1PYF | 2ZMU | 2AGT | 3ADR | 2XSF | 1Q25 | 1WV3 | 3NRW | 2BIJ | 2V1M |
| 209U | 4KD3 | 3LDF | 2ZB4 | 1NGF | 4B2G | 4A95 | 1T9Z | 103Y | 1IP4 |
| 1KDC | 4DMR | 1F0I | 3RE2 | 2W1W | 1L5P | 1Y2K | 1VA6 | 1GWN | 3QU3 |
| 3E0G | 3SE6 | 2QSV | 1CCR | 1Z1W | 3ICH | 1RFK | 3I18 | 3PWH | 1HFQ |

|      |      |      |      |      |      |      |      |      |      |
|------|------|------|------|------|------|------|------|------|------|
| 1WQM | 3V68 | 4E7S | 30KV | 1RRK | 1B90 | 2F7D | 1G15 | 3CS1 | 2WZK |
| 1QQM | 4KLK | 3A3V | 2ZPR | 3ER0 | 1HTJ | 4EHC | 2WN6 | 30C2 | 1SLY |
| 4I17 | 2W15 | 4KYB | 2GTN | 3EBH | 4I5U | 4AS0 | 2XIK | 1NRW | 2ZRJ |
| 1BN8 | 20SA | 3M9J | 3GU0 | 1VB3 | 3H99 | 3F0J | 1GDV | 4EDE | 1L1Y |
| 2P0L | 3D68 | 2ZV6 | 2IJQ | 4FX5 | 1L92 | 3T15 | 1E6L | 2CSD | 2BKL |
| 2ZWP | 2QZ0 | 10XJ | 1ABA | 1RWH | 1Z1L | 3LDU | 3R4C | 1VEN | 3PXL |
| 2R10 | 2JAV | 1H29 | 4H0C | 3UFI | 2YWD | 2X8X | 2IYK | 3L1X | 4G7L |
| 4FPW | 1A8D | 2HLR | 2WPG | 1W7F | 3DPN | 2B71 | 1M9I | 1KZM | 4MJ2 |
| 3SNF | 3ZCY | 1Q0I | 3ED8 | 1ECA | 3CQN | 2IVN | 1DX9 | 2004 | 308U |
| 3P7N | 3EDI | 20ZT | 1DXK | 4EL6 | 3E20 | 1CV6 | 4FGQ | 4EYG | 2H92 |
| 20LR | 3KBB | 2HZI | 2AWX | 1HUS | 3KL7 | 3CC6 | 1NDH | 2XKR | 3H41 |
| 3ALM | 1PZ7 | 1X9D | 2PNS | 3V0D | 2W87 | 4KH8 | 3CJ1 | 3L8H | 4EVO |
| 3QIC | 3I31 | 1MLA | 2YWK | 1B2Y | 10XY | 1GW2 | 3F2L | 3LXL | 3DQY |
| 3TC7 | 3QGY | 10JQ | 2GGC | 4DS2 | 3LDG | 2VDX | 2HQB | 3LF7 | 1X6Z |
| 4KB7 | 1JAB | 3B0K | 1LLN | 2P9B | 20CA | 1UXX | 2ESB | 3PSJ | 4AVQ |
| 1XB8 | 2AS9 | 10UH | 3F2Z | 3G4P | 1X8B | 2XA3 | 1UD3 | 2JFN | 2X9J |
| 4AAA | 3QSJ | 3CSE | 2ABS | 4ERN | 3KYF | 1HE0 | 2PWE | 3TNV | 3C0N |
| 3MF6 | 2YIB | 10J4 | 1PZ4 | 1G02 | 1ZVE | 302L | 3NR3 | 1T0L | 1QCF |
| 3D79 | 4AC1 | 3ZNV | 1HG7 | 1BCZ | 2FLS | 3AZP | 2F5X | 1UI0 | 3Q0W |
| 1JXJ | 2QRS | 1QXP | 1FGR | 4KK7 | 4FAI | 2H8L | 2AMY | 4HHQ | 3SVV |
| 2A6X | 1P63 | 2VAW | 4BB9 | 3DXN | 2SFA | 1VYF | 8CGT | 3GI3 | 2W61 |
| 1MDW | 3JRR | 3MYU | 1AAL | 261L | 1L50 | 1J08 | 2EG9 | 1WP5 | 3HNX |
| 1JL1 | 4GKR | 4AD1 | 1GZ1 | 3UAM | 1EJ8 | 167L | 2VI0 | 2QLE | 1RID |
| 4DQ5 | 2YLJ | 2GB4 | 1RP9 | 3BDZ | 4H2D | 4GJ1 | 3EVP | 1J0I | 1VIS |
| 1VFD | 1N7D | 3I37 | 2B30 | 2WNF | 1N42 | 1MMN | 2H58 | 1WI0 | 3NGP |
| 1CGT | 1INU | 4DGZ | 20Q5 | 1YN9 | 4AXC | 3FUT | 113L | 2Q7F | 4EKF |
| 3EIR | 4I0Y | 4JHT | 1P52 | 1II3 | 4G3H | 3FHF | 3BZS | 3T8S | 3NMB |
| 4AF7 | 1XHX | 1B0T | 1XTE | 3FFT | 4G50 | 1HV5 | 3EKC | 2WSA | 1M33 |
| 2DXA | 3BKH | 1LAX | 3W6E | 2EBN | 1V9P | 4E4V | 3EJF | 1WZA | 2B0T |
| 2D4H | 3ETP | 2BJJ | 1CUE | 1B3J | 3I2X | 2BB5 | 2A08 | 2UUW | 3CMS |
| 4KED | 1DPF | 3IM6 | 1YBW | 4IY8 | 4ATG | 4EDQ | 1M2G | 2GU3 | 3DM0 |
| 2IUS | 1WLJ | 2HCF | 3BLP | 3COM | 2GCB | 3SGI | 3CUX | 1I44 | 2HGD |
| 170L | 1H2E | 3EHG | 2VQ4 | 3UA6 | 3U1F | 2EIC | 2YK0 | 1XWB | 3HCH |
| 3TYK | 1L12 | 3MST | 3MVS | 1YNA | 4E1Y | 2V9V | 3IXR | 1UBN | 2WKP |
| 1MPP | 1YII | 2MSJ | 2RGG | 1VMA | 200P | 3UP9 | 1EU1 | 2QR7 | 1MX2 |
| 2AT0 | 4A0W | 1GKU | 1IZK | 3TVD | 1IXG | 4A7M | 2DUT | 3FHD | 3C9P |
| 1GB0 | 2X5P | 3BAH | 3K8K | 1HGU | 4F60 | 1FLU | 2P3H | 3V3S | 1D4C |
| 3QPD | 3GQ0 | 1K5A | 4IPT | 2HXY | 3QZL | 1X8Q | 1AW7 | 1VPY | 1KZL |
| 2FEM | 2CXV | 1ENJ | 1C69 | 1UCG | 1LYV | 1CUV | 2XBT | 3LH5 | 1IV8 |
| 3NMQ | 3E9S | 3HDX | 3UC3 | 1B21 | 3PL0 | 1UGE | 3S1Y | 1L57 | 3M2J |
| 2FMX | 2YYW | 3K6P | 2W9Q | 3CWI | 3LES | 4B9G | 30IH | 2HT6 | 2JDG |
| 2WF7 | 2YMO | 3ZJC | 3Q72 | 3IU1 | 3NY9 | 10T8 | 1J1N | 250L | 2H1V |
| 1V33 | 1WAK | 1WMA | 1NQF | 3KKN | 4G08 | 2HSZ | 2FTB | 3L0Y | 2W7S |
| 1QY5 | 3W1E | 2WSR | 1AHO | 1NYL | 2YBY | 2ABI | 1L3K | 2G6F | 4B6X |
| 3V92 | 2C1C | 3TQ0 | 1FHU | 2HMH | 1GVZ | 2CX6 | 1QUH | 2HWX | 3V01 |
| 1DCQ | 20KM | 3PT3 | 3CPG | 2CE2 | 3LN0 | 1L41 | 2P2M | 1VSN | 1E0V |
| 2VKA | 1GVL | 3GQQ | 1YLH | 3VU2 | 3VMT | 1YZK | 3F67 | 1ZHX | 1CIP |
| 3R3Q | 1PV7 | 3N00 | 1VFL | 2XI1 | 3U87 | 1RT8 | 1ST8 | 4JXM | 1JRZ |
| 3IC4 | 1EAM | 1Z07 | 1BRN | 3F8T | 5NUL | 3EE9 | 2J8B | 1FGT | 2YWQ |
| 1WR2 | 1UGC | 2UYT | 3IHW | 4I8H | 1CJA | 2AX8 | 3D30 | 307I | 2B91 |
| 1FFR | 3BQE | 3GMR | 2FV8 | 3EW7 | 2LIS | 1YV4 | 1CYF | 3G8V | 4GJZ |
| 2JEK | 4FLR | 3FJ2 | 2V7Y | 4FTD | 1XW2 | 3ITG | 3MVV | 1I02 | 3S1E |
| 3GHA | 3QVM | 3RE9 | 3RU0 | 1JD4 | 2VND | 4GV0 | 2OHF | 1PTV | 3MF9 |
| 2C8S | 4EE9 | 1HA5 | 4AGK | 2YD4 | 3LL2 | 1WX0 | 2X97 | 1WCZ | 3D6C |
| 1F0N | 4AUP | 3KP8 | 3C1U | 1F5J | 2GF0 | 2AH2 | 2X32 | 4HF0 | 3VTE |
| 4AFV | 4AY1 | 2YM1 | 2RJM | 4ATT | 3A0Y | 2A9V | 2QTD | 2IJF | 3CWK |
| 1CGL | 2VZM | 4DWW | 3ADG | 3LKD | 1CQD | 2Z6G | 3VI8 | 1IUK | 1EAX |
| 3DLW | 4GS0 | 2EU7 | 4JYF | 2XWV | 3S1S | 3FG7 | 2BAA | 1L60 | 4G7F |
| 3UBD | 2BK8 | 2XY4 | 110L | 3HC1 | 1L9C | 2DUI | 4FNX | 2H6D | 2IC2 |
| 3HZC | 1UI0 | 3VRQ | 3ZHW | 3LYS | 3SG1 | 3B9Q | 2H4N | 1N8V | 2RKN |

|      |      |      |      |      |      |      |      |      |      |
|------|------|------|------|------|------|------|------|------|------|
| 1MG4 | 4KBZ | 1A5Y | 2QQI | 3G4D | 4HXW | 3ALJ | 1G07 | 4F6J | 2AR5 |
| 1E6H | 172L | 2BLC | 1GPI | 3TZG | 3T0B | 1UK0 | 4INW | 3HMB | 1C97 |
| 3CLJ | 3CW3 | 3FEZ | 3GB0 | 3V53 | 1SYD | 3P3K | 1UKF | 2ZWA | 2XI3 |
| 1FCQ | 1YIV | 3ZXK | 1ZKJ | 8ABP | 1PNF | 3CKM | 3HY4 | 1U9U | 1W6X |
| 3NQH | 4EVM | 3P02 | 1QFJ | 2F00 | 4E56 | 3EC2 | 2I88 | 3ZIJ | 3MUH |
| 3I6V | 3RX9 | 1RP4 | 3GKA | 3HCI | 2WMK | 1NEP | 2E9L | 3LWA | 4FVC |
| 4DT4 | 2ZEZ | 2YWI | 2HVL | 1E6K | 1ZAU | 3QSL | 4AE5 | 210L | 1KNI |
| 2VAC | 9CA2 | 3MFR | 1TR9 | 1L1E | 1I71 | 1QQT | 1C6R | 2FKG | 3SXL |
| 1NFN | 3A99 | 2P9R | 1H4M | 2RJV | 2XQ0 | 1NP2 | 3GI1 | 1W6J | 2W0L |
| 235L | 3BUU | 4IFE | 1FFB | 1MLW | 4I16 | 3L5H | 3FDH | 2F28 | 1J36 |
| 3B0P | 2FC3 | 2WF0 | 2D1V | 2PX6 | 234L | 1BYP | 1I00 | 1FCM | 173L |
| 2G50 | 3A40 | 3NVL | 3U67 | 1A2P | 2A4V | 1Y0L | 2PNN | 3TUG | 1S01 |
| 3SR9 | 2XMI | 3E6K | 125L | 1G0U | 3SQR | 3LQB | 3A24 | 1UIB | 1PZD |
| 1WDQ | 1POA | 2B0U | 3Q1N | 1U6D | 1PZP | 30FK | 3L9T | 3BI7 | 1E0F |
| 1U9C | 2XSP | 4IAL | 4A0P | 3K9Z | 30AI | 2BL9 | 2C2N | 3LS3 | 3R7A |
| 3NR0 | 3S6S | 1Y0J | 1MHN | 308P | 3N2E | 10T0 | 1HQ0 | 4L5H | 4FY0 |
| 1TAZ | 305S | 2AZ0 | 1RBV | 1L8K | 2RFF | 2CHM | 1H5Y | 1MAI | 1SFE |
| 3VYW | 4GUD | 1HG8 | 1SNC | 1R2D | 1P0H | 3QF6 | 3QXL | 2VTC | 2ZPA |
| 3HM5 | 3GMI | 3I0A | 1Q0B | 3FKE | 2R6J | 1P6P | 3IUS | 2ABK | 1Z80 |
| 3P3C | 3D61 | 4FHE | 4KJN | 2P6X | 2E0W | 2W1K | 1BRH | 3AB6 | 10B0 |
| 3N10 | 1N6C | 2X7M | 2QRY | 3MQZ | 3BCK | 3MQ2 | 3CCF | 3C80 | 3CVA |
| 4KAJ | 107T | 2RE3 | 1XM8 | 1BT0 | 1LAA | 1SEG | 1B5L | 3P08 | 4E0L |
| 3E59 | 1G94 | 1L62 | 4FA0 | 3AYC | 1P3D | 2ZQT | 2C29 | 3JQ0 | 4HQD |
| 1LI5 | 3HFW | 3PQC | 3HJL | 3DA1 | 1F00 | 1E39 | 2ES0 | 1J0P | 4GS4 |
| 1KGW | 4AHH | 2NT3 | 1BC1 | 3T6K | 2RKX | 3MFA | 3GRU | 1UX0 | 20KL |
| 3HK0 | 4DQD | 2IF6 | 4BLM | 7PTI | 3UL8 | 5MSI | 2Q8P | 3QYE | 4DGX |
| 1YQP | 4AXN | 2WUG | 1BUP | 3PGS | 1GV4 | 3T8V | 1RXI | 3G89 | 3U0L |
| 1VKB | 3EYG | 2R1B | 2HU0 | 30TX | 1B0V | 3B3D | 1T43 | 3FDJ | 4EKL |
| 3EC3 | 1NCJ | 2BQF | 4JG5 | 3BD3 | 3SHQ | 4AHC | 3MH3 | 3QXW | 1EY6 |
| 3DAU | 4I1F | 2C8B | 2RKM | 4E1S | 2F0M | 2Q9D | 3QYB | 1F0X | 2X26 |
| 3F83 | 3P98 | 2IWA | 1MUG | 2FAZ | 1XZD | 2BT6 | 3W6M | 1WE4 | 3TB7 |
| 1KTG | 2NXT | 2GL2 | 3T9T | 3KS6 | 3NT8 | 2QG1 | 1CKH | 1KG2 | 2RA9 |
| 3RDR | 3ZH6 | 3HD4 | 1T9F | 4ASC | 2FMA | 2PYA | 2QDZ | 4F54 | 1URR |
| 1L8B | 2W50 | 1J2A | 1TM0 | 2EAD | 2PDY | 2RF0 | 1IP1 | 1Y59 | 4AX1 |
| 4JEI | 3MW3 | 3GDB | 2Q9T | 4AW7 | 2FG0 | 4AMC | 1A20 | 3NAX | 3D0K |
| 3ND8 | 1G6H | 1JVJ | 2EA3 | 3JZZ | 147L | 3AGT | 209R | 2GK6 | 3L2Z |
| 1JZI | 2BKX | 3TNK | 3CB5 | 3ER0 | 3NYX | 3KGD | 3JXH | 2FG5 | 1DKM |
| 3AI5 | 3TP0 | 1VJN | 2IJ2 | 3FQI | 4GJX | 1CZP | 2YJ7 | 4EIH | 1GB2 |
| 2ZCA | 1D3J | 3VSE | 3RGM | 3FNL | 4F67 | 1DKK | 20VD | 3D4D | 3KZX |
| 3TB5 | 1W9P | 3RNS | 2BI7 | 2WHM | 2ALA | 199L | 2V4V | 1LYG | 3KUQ |
| 2R8B | 2ZUJ | 2BNH | 3FM1 | 3IDU | 2ZF8 | 2Y3V | 3V7L | 4ACY | 1J6R |
| 3EK8 | 2VCL | 1M59 | 3C8S | 1A0P | 303T | 20W6 | 3QZR | 1TS4 | 2XW0 |
| 2HW2 | 1QT3 | 3RG0 | 3GUU | 4G17 | 2IXN | 3H4X | 2ESP | 2A1L | 2YB1 |
| 3VUE | 2CJP | 3SAD | 4DDP | 3MD9 | 4G9I | 4FR4 | 1VYS | 2RJN | 3CYI |
| 3NWP | 2VZ0 | 4DM0 | 3FT0 | 4ID3 | 1MB8 | 3H6E | 1XAU | 1YAP | 231L |
| 4BE8 | 1QT8 | 4DIX | 1P2R | 2G62 | 3ML5 | 2XWR | 4AGJ | 3ZYW | 4HJK |
| 2Q8K | 4E00 | 2I0R | 30JW | 3HTG | 1T00 | 1MD6 | 1W42 | 1R4B | 2ASI |
| 2ENU | 3CYR | 2ZDJ | 4GSR | 3K7C | 3L3F | 2V8I | 2CI0 | 4J3M | 3CRV |
| 3R69 | 3MS8 | 3UMS | 3SY9 | 3SCY | 4EAT | 1BIY | 1M00 | 4GFQ | 2YWZ |
| 3FYD | 4GAW | 1GBY | 2ABB | 3RKX | 2HDZ | 2AWK | 3DTK | 1N60 | 2QLI |
| 4I5R | 30BL | 1XAP | 1XG6 | 3RY3 | 1MUA | 3FW7 | 1ZB1 | 4GQ4 | 2ENW |
| 2ATM | 3C5H | 4ESU | 3I1F | 3SG2 | 4JGK | 3GN9 | 3A4R | 2X0A | 2D5J |
| 3URC | 3JRN | 1HCB | 1R6J | 1ML9 | 1BIC | 2YG7 | 3V46 | 1S14 | 2RH3 |
| 2WIM | 2FAV | 2BM0 | 20UP | 2PYK | 2I0J | 1FNF | 2087 | 2A01 | 1E1D |
| 2F0Z | 30KP | 1R5M | 4HQ1 | 3NPX | 2BZX | 1LJ8 | 1UKP | 3BS9 | 2W0G |
| 5EAT | 3MZF | 3ADZ | 1L0D | 3NOH | 1YK9 | 3DXS | 1RAL | 1KXD | 3GIP |
| 3M1W | 3L23 | 30P5 | 1GBA | 2NYP | 1SXX | 1Q7R | 1YSQ | 1C83 | 2Q43 |
| 3ZH7 | 3H0F | 3M9Q | 1L75 | 4FPX | 1VRX | 1SNB | 3KHE | 4F4F | 4G37 |
| 3ALF | 2WSD | 1ZIC | 4FGD | 1E8Y | 3RVK | 3PGU | 1ES2 | 4JN3 | 1DRJ |
| 1A70 | 2Y6X | 2C6Z | 20K3 | 1IFC | 1X3K | 4ACK | 3Q3V | 4ETI | 3FZY |

|      |      |      |      |      |      |      |      |      |      |
|------|------|------|------|------|------|------|------|------|------|
| 3BA0 | 1GND | 2P61 | 3E5S | 3GM3 | 4A30 | 4AVN | 1ZCA | 3PQV | 1JR2 |
| 3NP3 | 2Y0H | 2FPH | 3FFV | 2X1V | 2J42 | 20IT | 1LBA | 1G2B | 301Y |
| 3FAY | 3NY1 | 1YK5 | 1WMD | 1KR1 | 2Z47 | 2ZRQ | 1CCP | 1KHV | 3AGK |
| 3IT7 | 1VCP | 4FR7 | 4F7K | 3LD0 | 4H3S | 1D5C | 4I6X | 4KRR | 1JVV |
| 3BWH | 3T7H | 2BZ7 | 2CS7 | 1S0I | 1FKL | 2RG3 | 2BF4 | 2GX6 | 2AZW |
| 1CYX | 1T1U | 3SHU | 1SVU | 3A7C | 2FGN | 3I8U | 1LHH | 3TEB | 1SNZ |
| 4AQK | 3TBN | 2YZ8 | 4FYB | 2MEI | 3DHA | 1RM8 | 2BCH | 1ZY0 | 1KVW |
| 2J0V | 1S3P | 1W9J | 4AU9 | 3C83 | 2W7Y | 1CV3 | 10TM | 1F98 | 2XDY |
| 1L0G | 1RA9 | 3KZS | 4HWD | 1YE8 | 3UEM | 3MX3 | 1IX0 | 3JT2 | 1Z6I |
| 2V95 | 3PHU | 4ETT | 4IQF | 3MJF | 3N0X | 1CGW | 2ZE4 | 2W1N | 3UP6 |
| 20SX | 4DY9 | 2Z5J | 4MN0 | 2NXF | 1XCL | 2YN2 | 2WIY | 1EX7 | 1XV5 |
| 3C1E | 1T9H | 1XZH | 3V3G | 2H34 | 1B5V | 1ATG | 2V70 | 2ZCV | 1U9M |
| 3GPI | 1FUS | 2X5L | 3E53 | 4A3U | 2G2X | 2BJQ | 4ASE | 1QK8 | 2XB0 |
| 2HFS | 4JX9 | 1UP9 | 1YMV | 4EVQ | 2BVV | 1K4Y | 4FMZ | 2EUT | 2FVV |
| 1URX | 2PA1 | 3CB7 | 1ZHP | 1KHB | 3HFF | 2NYA | 1RN4 | 2VL7 | 3HSJ |
| 1H6L | 2VIX | 1D01 | 3S0C | 2RI2 | 2ZQE | 3CDR | 1BRF | 1VLP | 3AGN |
| 4ABY | 3MC2 | 4F6H | 2PZG | 3GYJ | 4A02 | 4DHE | 2I49 | 3FU0 | 2EYH |
| 3MP2 | 2YNK | 2RI5 | 3EMU | 206Q | 2CXY | 3SUL | 4J93 | 3RF0 | 4FGF |
| 2NQH | 3VHJ | 4E6X | 3I4G | 1E2Z | 4IYK | 2I5Z | 3FRT | 3V50 | 2QDF |
| 1RFS | 2AD1 | 1NGG | 3UL9 | 3B6Z | 3DJM | 30D0 | 1KW5 | 3HVA | 2WAF |
| 4K60 | 2C78 | 1UMK | 4GYU | 3HN7 | 2Q30 | 2C1X | 1ZCE | 3LL0 | 4E5A |
| 1XWY | 1K7J | 3RHY | 2IUX | 1LY2 | 4E46 | 4EI7 | 4HDT | 3I40 | 2X8S |
| 1XGK | 4AN8 | 1H7S | 1CPW | 3HVI | 1I3F | 4FE3 | 10I7 | 2HQJ | 3UTK |
| 3KA7 | 2YG6 | 1KRJ | 20TE | 3IEI | 3NEY | 1JJV | 3SLO | 3AJG | 2JI0 |
| 2HZF | 2DQ7 | 1PJR | 10DZ | 2W5F | 3LM5 | 3GDH | 4IUW | 2AEZ | 1LR7 |
| 2JH2 | 1TRH | 2YGE | 3NV6 | 2CIP | 4EFP | 3MZS | 3UHM | 4FIH | 1Y51 |
| 2BL7 | 2GTG | 1ICX | 1JG1 | 4DWR | 3TXZ | 2XKW | 3FGS | 3FN5 | 4HWM |
| 3MNH | 1SUJ | 2IPM | 2PQT | 3VUS | 10UB | 2X6U | 1TFF | 3RBW | 4HVT |
| 2D3Y | 20US | 3UV2 | 3TP8 | 307W | 1B0L | 3R4S | 3LML | 2IJ4 | 3ZX1 |
| 2VSE | 1TRI | 1Q46 | 4HU4 | 1SD0 | 4FFL | 4JJY | 2FBA | 1GY2 | 106G |
| 1F2Y | 3T54 | 2E26 | 3BDI | 1JF0 | 4KNV | 3KLK | 3M1T | 3PG0 | 2EWI |
| 1XZF | 3D2A | 4GKY | 1MXG | 1MRH | 1TWE | 3TFF | 10W1 | 3UY7 | 3H75 |
| 1XGD | 3RQT | 4KBL | 3EYE | 3QXQ | 2E7Z | 1SNP | 2ENG | 3CDQ | 1DTL |
| 2R89 | 3G7N | 3KK7 | 2H4R | 20XB | 1FQL | 1V3H | 2XJK | 1AHR | 3FDW |
| 1W9L | 3JUE | 1FV9 | 2ZV2 | 1EYH | 2WCJ | 3FM9 | 1BJE | 3LPC | 1QF9 |
| 4BWR | 3MTT | 3TM4 | 1IM4 | 3R72 | 2ZJY | 3HMS | 2CNC | 3FVI | 1QZM |
| 30PT | 2BVL | 2W00 | 3VAS | 4F6C | 2PND | 2YIK | 3EQE | 4HTT | 2HI4 |
| 2Z0X | 1Y0P | 3LM8 | 1Q8Y | 3VER | 1V00 | 3D08 | 3RP8 | 2HSH | 1SIG |
| 2GH4 | 217L | 1WPA | 1BGC | 4DUE | 3048 | 20V7 | 1I9Q | 4EIE | 3GUG |
| 1PRQ | 1RRF | 100T | 1Z53 | 1T5C | 4EQK | 3CLN | 4DRT | 2C8M | 1QSA |
| 1V2S | 1ZI0 | 1BC3 | 2NTP | 1EYN | 2ETJ | 2VIM | 4GE6 | 30SX | 3FRX |
| 4GA0 | 1WDI | 2Z8X | 2ERW | 2P51 | 3R0R | 2YA2 | 2JIE | 2HQ2 | 3TI2 |
| 1IQ0 | 2BV3 | 2WAA | 3C01 | 1RPJ | 3KPX | 3B55 | 2W51 | 3DV7 | 3LKY |
| 3GYL | 3HV8 | 2EW1 | 1QNT | 1CUY | 2XIR | 1LQJ | 3AU3 | 3M89 | 2PV4 |
| 4GEY | 3Q6K | 2UVJ | 3ELI | 1CGX | 1DI3 | 1UV4 | 6AME | 2V5D | 1T07 |
| 3HJ4 | 2YQ9 | 1XK5 | 3LLC | 1XQR | 3RJD | 1BGE | 3CXL | 3NGQ | 3K1W |
| 3S3E | 1RDC | 2MGJ | 3PDQ | 2SGA | 3JVI | 1R62 | 1IPC | 1QFM | 1J1Q |
| 30WG | 4J9T | 1GS0 | 2JLN | 3HWN | 1FNA | 2FCP | 1JNU | 3GKM | 1UEJ |
| 2Z7R | 3T00 | 1QDM | 3R67 | 2IQ7 | 3I4I | 4A3P | 1NGE | 1I92 | 2P3X |
| 1KY3 | 4B3N | 4EV4 | 2QEN | 2P3S | 2CGQ | 2XRG | 4GGP | 2F0L | 2WLR |
| 3AGL | 1TTZ | 3DW0 | 3W7T | 4DFI | 3EG2 | 2CX7 | 2R4L | 3013 | 3C1F |
| 1DT2 | 4E2Z | 4BIB | 3U3B | 3F65 | 4J87 | 4EMI | 4F5Z | 3RAZ | 2GWR |
| 1CII | 3K13 | 1COL | 3CD1 | 2HRS | 1GIS | 1EQE | 1Z2Z | 3POH | 3UIF |
| 4HA6 | 4ASK | 4ITJ | 1UYN | 3FWJ | 2QN0 | 1R5X | 2062 | 3FFW | 1EM7 |
| 103L | 2END | 4FK8 | 1YVU | 3T95 | 1EXN | 3MSW | 3NC3 | 2E3I | 2Z72 |
| 1UY4 | 1ZSC | 2AZ4 | 2P20 | 3E70 | 3VGZ | 2QF4 | 3NZK | 2GMH | 1D3K |
| 1LE6 | 2XNE | 4IDR | 4BD4 | 2V0V | 2PT2 | 3NVX | 2HEU | 2D54 | 1PVA |
| 1EQ4 | 1T95 | 4A66 | 1YZN | 1YF0 | 4L8K | 2FP8 | 3EKI | 3VHN | 1GSV |
| 1TVF | 1XZC | 1L71 | 2QU0 | 2WL1 | 2W3W | 4GR4 | 20F1 | 2J8I | 1JPE |
| 1JT4 | 2H5C | 163L | 4G9E | 3AAM | 3FLE | 1F76 | 4IXC | 3Q0U | 3IF7 |

|      |      |      |      |      |      |      |      |      |      |
|------|------|------|------|------|------|------|------|------|------|
| 1AD2 | 3K7G | 4EUZ | 3DT8 | 1C9M | 1LI9 | 2Y5P | 7AME | 4DIJ | 2R6H |
| 4AMQ | 2IUJ | 1VHU | 3HM8 | 4GMQ | 2WAW | 1CUH | 3AP9 | 1NF1 | 1H19 |
| 3MA0 | 1LME | 3IM9 | 2B7S | 1JD7 | 2P40 | 2XHG | 1P2H | 3IM5 | 3L7N |
| 4GW3 | 3A0F | 2GHI | 3A0F | 2RB6 | 3U2P | 4G2P | 215L | 3S2U | 3KN6 |
| 2PCS | 2B4F | 3SUZ | 1I19 | 1CTW | 1T7A | 2BAX | 1ZD9 | 1VC9 | 2B96 |
| 4KY6 | 3E9V | 1CV4 | 3HP4 | 4ETU | 3Q07 | 1YTM | 2I6J | 1YZG | 2H5Q |
| 3LUR | 100J | 3ZBD | 2HWV | 1FVX | 20F3 | 1XZG | 1CLM | 2JKQ | 20Y1 |
| 2V0V | 1D3W | 1XZE | 1TWM | 1UCS | 3RI8 | 1ALA | 1NWL | 4B9Z | 2XUZ |
| 1X8M | 2WUU | 1F0J | 3FLL | 4A37 | 2IDQ | 1KAZ | 4FS7 | 1IG8 | 4FUQ |
| 3DFF | 2ES9 | 1WEI | 3H92 | 2F9L | 2HEC | 2QCY | 3IG9 | 2Y9E | 20KT |
| 2I4A | 4A2E | 1PA1 | 2RFL | 20UA | 2VAP | 1DBI | 3ZLW | 4GE0 | 2WZS |
| 2C9K | 1T64 | 1W78 | 3C0I | 2B1L | 20M5 | 3SS7 | 1GYM | 30V5 | 3GBL |
| 2HVQ | 20LN | 2AR1 | 2VGD | 4FWY | 2V94 | 1DUI | 1ZVT | 2HES | 1DYQ |
| 1DST | 2E3B | 1HZG | 2YDZ | 2WMF | 1BK2 | 1H4W | 3IUQ | 2GF0 | 30NH |
| 1LZ6 | 3DDU | 3QHN | 2QDV | 4AM1 | 4G26 | 1BNS | 4LER | 4HWY | 2ZUY |
| 3AA4 | 1H8K | 4BDS | 3MCF | 3NUQ | 1GEZ | 1YPX | 3GF8 | 142L | 2ZJM |
| 1MI4 | 2R2I | 4K14 | 1I0R | 1GOA | 1I6Q | 3I0U | 4L7A | 207U | 2WJ6 |
| 3NDA | 4KAP | 1V4A | 2I0Z | 2QYQ | 1XR0 | 2XVP | 2DRI | 2XB1 | 3IPW |
| 4HHX | 1XRV | 3KGR | 3RYY | 30FM | 3UID | 3I45 | 1G0J | 1RL2 | 1DR9 |
| 3N2J | 1W52 | 3CRR | 3MCM | 1WHZ | 1CYJ | 1L86 | 1QGJ | 3KEZ | 3R44 |
| 2Q3R | 2DUE | 1XVY | 1QSQ | 4BFG | 1HHS | 3NFI | 1IFG | 3M97 | 1YU5 |
| 3U3G | 1TQ3 | 10PB | 1QL3 | 4E2X | 1PY4 | 2VYZ | 1YT3 | 3U0X | 3A2I |
| 2XWA | 1ELJ | 2R9Y | 2JC5 | 1K09 | 1EPY | 1CJ6 | 1BIT | 3TPT | 4AHD |
| 2VUW | 2VE0 | 1ML0 | 2Y0K | 3NA4 | 3JR7 | 1SVI | 1UGM | 2X9B | 1VJV |
| 2WXW | 1Q35 | 3NLC | 2ETC | 1DZK | 3VD8 | 1QPK | 1QYF | 3QU4 | 1MFM |
| 3G7X | 2QTF | 3A0Q | 3LC9 | 3EC4 | 1GDY | 3EUD | 1BK9 | 1PAZ | 2H1R |
| 3SJZ | 1Z5Z | 2E0Q | 130L | 1NNF | 3GBA | 3ZIK | 3GXB | 10UV | 2ZUX |
| 2GS8 | 1A26 | 3NS5 | 2EAB | 3ALL | 1R55 | 2VZU | 4EDP | 3LS0 | 4AM0 |
| 2QQ8 | 4G75 | 1CRZ | 1GM6 | 30SJ | 20VJ | 2HEB | 1K7G | 3Q2C | 3ZS4 |
| 1DZA | 30QV | 3SEB | 3UYQ | 2CN2 | 2QQM | 2EY2 | 4A0D | 2YL2 | 2WJE |
| 1J00 | 1SVY | 1MOD | 4B6M | 3PVH | 208U | 4FG5 | 2PSP | 20U0 | 1UJC |
| 3G09 | 4GX7 | 3QFR | 2I6P | 1LG5 | 2Q3J | 3JW7 | 3NHN | 2EYI | 155L |
| 1L22 | 3ZJX | 3NTS | 4EQP | 4DU9 | 3U1R | 1TX0 | 2V08 | 1Q8D | 3C2H |
| 3BCI | 1T7L | 3KUH | 2HJE | 4E32 | 1IKQ | 2ZRR | 2DKV | 1IN5 | 1P3J |
| 20FS | 200L | 2Q57 | 4KWU | 3GNU | 4K5W | 1AK2 | 3MWN | 3CV8 | 3C73 |
| 2IM8 | 3B8A | 1GT6 | 1KS5 | 2CJ3 | 3MGX | 3IV6 | 2Q99 | 3KLR | 1NST |
| 4G0T | 2ATZ | 3KT5 | 2RJ2 | 305J | 2IBB | 3FW3 | 1B0Y | 2HCN | 246L |
| 1HKB | 3KS4 | 4EU0 | 2F0N | 3RDY | 3III | 3TL4 | 3TZM | 1H3N | 10B0 |
| 1ZBT | 4IT8 | 2ZJI | 3IPJ | 1CSV | 4L11 | 3QI7 | 3SG3 | 3NVJ | 2DRU |
| 2I24 | 2R4T | 3GRE | 3IB0 | 3I09 | 1RV9 | 1CEW | 105Z | 1FRI | 2IPL |
| 2REU | 3BZN | 2A1N | 1Z1A | 4APM | 3KV5 | 1URM | 3MRS | 2UUT | 1RYN |
| 1GR1 | 3QQX | 2DT1 | 4HD9 | 200A | 2YPC | 3TCA | 3HP7 | 2J1W | 1HXR |
| 1S4B | 1HUY | 20U9 | 4F7Z | 2X7Q | 3PP6 | 3V5M | 2H6Y | 2JHX | 3HYG |
| 4DNI | 2BEP | 1LFK | 3SR0 | 1TDW | 1D4N | 3AGP | 4HD7 | 2D1T | 1QKW |
| 1H7M | 1JY0 | 1KHV | 1UIE | 4HMM | 3NQX | 3HDF | 3UGJ | 4D8K | 1QMY |
| 3E0U | 2R60 | 3PZG | 1GQ8 | 2GUI | 1PZV | 3B49 | 2H2Y | 4DXD | 3PF1 |
| 1DI1 | 3CED | 3B4X | 1PME | 3AVS | 1P7S | 3EYC | 2QNK | 1YLW | 1NCN |
| 1J99 | 3PB6 | 3EF1 | 2DKA | 4EYV | 2YFX | 1LVG | 4E50 | 2CEP | 2W0B |
| 1N7W | 1R0W | 3L00 | 1AD5 | 4I69 | 4HSD | 1F2Z | 2WQQ | 2YH3 | 2ITN |
| 3MJ6 | 1DQY | 2D3D | 4HGG | 2ZK9 | 3SDN | 2V0U | 3NKJ | 2DEP | 1SQW |
| 2XU9 | 3C0C | 1S20 | 3RGN | 1PX5 | 4EUE | 4FEY | 1R2Q | 1XR7 | 3PLC |
| 3I57 | 30BF | 2WQE | 1JTA | 3TF0 | 3GP0 | 1RIF | 4DNY | 1MBM | 2ABW |
| 3RP7 | 1MIX | 3MDM | 3EB9 | 1S3G | 102M | 4A60 | 3ULJ | 302T | 4A2S |
| 3A09 | 1W9F | 3NZ1 | 3H6M | 10KC | 3P8I | 1GB9 | 2W4B | 2HS6 | 1Q7F |
| 1JKD | 3SFK | 3DCY | 1R4X | 2GF3 | 3N0H | 4AY0 | 1SW2 | 3L6V | 3AV8 |
| 1TF5 | 2WMG | 3VTV | 3ACH | 3N0R | 3K0G | 3JYI | 1DYK | 2D3V | 3M03 |
| 3FEK | 1RHL | 3C0D | 1XT0 | 2084 | 3LCC | 4AEM | 3E0H | 1FB6 | 2XIL |
| 4I68 | 243L | 4I3D | 4DJM | 3NZM | 2PBC | 1RSE | 2CP4 | 4D8B | 1HJQ |
| 1PA2 | 3TVK | 3RWM | 129L | 1VSR | 1L66 | 1YIX | 1BRU | 1YH3 | 1G06 |
| 3ZYZ | 2JLS | 3TEZ | 4HBZ | 4FVM | 2II2 | 2DW0 | 2Q0N | 4I5H | 4BBK |

|      |      |      |      |      |      |      |      |      |      |
|------|------|------|------|------|------|------|------|------|------|
| 1YZ1 | 1FDQ | 3FEU | 1FY9 | 3BWT | 3AMN | 2R9V | 3LFU | 3LX4 | 2Z1H |
| 1SYT | 4IQP | 2VH7 | 1TRQ | 4FDG | 4KP6 | 1L5T | 4GPM | 2HC1 | 3M3A |
| 3I06 | 1WDS | 2GCA | 1L9X | 1SNQ | 20EV | 3ZLX | 2J6V | 209P | 1BY3 |
| 2J43 | 3THI | 2F0G | 1B1E | 1HD7 | 2WK0 | 4J2U | 2YB5 | 2GEE | 4KKD |
| 3CKC | 2IE8 | 4EY0 | 1WQG | 2VXZ | 2Q07 | 3GWG | 3EWD | 3ASI | 3FNR |
| 1C7F | 1NWZ | 3G0Y | 1T4W | 3CSG | 3LEW | 1NHC | 2P1W | 4ASM | 3IM8 |
| 1WSH | 3FV8 | 2PP0 | 4FS8 | 2F1Y | 3UC2 | 1QU0 | 1Q0A | 3KT9 | 3MFY |
| 3UC1 | 2GGZ | 201E | 1UN4 | 2PTD | 2P0N | 20S3 | 1A53 | 3EPZ | 4GDJ |
| 3VAA | 4AX7 | 3QNT | 1016 | 3SNK | 3KZD | 4E3K | 2UWN | 1N9Z | 2PSB |
| 3CSK | 1W0U | 3NNE | 2VSN | 1N5U | 1YN3 | 1P64 | 1S02 | 2R4G | 3Q3U |
| 1S3X | 4HWH | 2VY9 | 1M4L | 1L8R | 2Y22 | 2P9F | 2W04 | 2IUU | 2XXP |
| 3HLD | 2UY0 | 3TC5 | 3V0J | 1IHN | 2XM0 | 1WRI | 1JWZ | 2Y8R | 3ZDP |
| 3QL0 | 2D58 | 4JXI | 3V98 | 1SH0 | 1AZ0 | 1TXL | 1IK0 | 4JIC | 3IUU |
| 4GC1 | 5CHY | 4I20 | 3HIL | 3QDH | 1T7B | 2XFD | 1HR0 | 1UT9 | 1E6M |
| 2R5X | 1KHC | 1RRA | 2E3V | 2G0I | 1PB8 | 1EW4 | 1LF1 | 1CI0 | 1L47 |
| 3AUB | 4GBS | 4AK2 | 4G0J | 2B6M | 3C7F | 2VQU | 1JSS | 1G0C | 20IX |
| 2V7B | 2GHC | 1AT5 | 2Y44 | 2H5A | 1XJD | 3LJ8 | 1CJC | 4FBS | 1DT4 |
| 3ZI1 | 3N13 | 20WC | 3ZGL | 3H1G | 3NHM | 1GF7 | 4GAI | 2G8C | 3HFQ |
| 1CM8 | 20CI | 3CGG | 3P6J | 3ISY | 1UTE | 3P3V | 1DJ1 | 2IEE | 3SER |
| 1V73 | 3CH0 | 2P57 | 2ZZJ | 3PYC | 3U0M | 4KKN | 2Z8Q | 4ES6 | 2PMK |
| 1EGZ | 3PBI | 10PS | 3HBF | 1PQI | 3EPS | 3FP3 | 1GZ7 | 1XQV | 3LP8 |
| 2IAQ | 4I5V | 1BG4 | 10QW | 2H71 | 2BBR | 4G9R | 1RZ3 | 3IRA | 3UWT |
| 1T2I | 1JFR | 1F1S | 3DRN | 3I19 | 3ECI | 3VA5 | 1ZKL | 2W0C | 1MJN |
| 4A4K | 2C0K | 1UK0 | 2BHG | 3KMV | 4HS7 | 4AZ6 | 3S0G | 2IFT | 2F0K |
| 4B4H | 1ZK5 | 4GE1 | 3EEB | 3ELX | 3PGR | 3V8J | 3AAL | 3H38 | 1TYJ |
| 3PA0 | 1UDH | 1SIF | 4A68 | 2Z1A | 3IM1 | 2F0J | 151L | 3GA4 | 1APB |
| 2IC6 | 3H9X | 1LC0 | 1I1W | 10LR | 1UV0 | 3PLB | 2CKG | 3IMN | 3R26 |
| 10KB | 1LV2 | 3BTA | 3H0H | 1CLC | 1LHJ | 1TG0 | 3LLH | 4A78 | 3IEE |
| 30JP | 3BWX | 1C91 | 4EVS | 2RI9 | 3NQ2 | 30UL | 2Z0M | 1KNP | 2I1Q |
| 2VQ9 | 1BXV | 3K8W | 1MYJ | 4J5Q | 305D | 2VE3 | 1CNS | 4I60 | 2IPQ |
| 1U2P | 3TXN | 1KZF | 1YUW | 3A1F | 1FQF | 1Z0X | 1WRM | 2J69 | 1PMY |
| 3LHH | 4JZS | 3LET | 1N0U | 1UGB | 1BAN | 2C2Q | 3DZJ | 3V3F | 30G9 |
| 1HZI | 2FIA | 4IPA | 4KV7 | 2CU9 | 1GPP | 4FWB | 2NSZ | 1K0M | 4ELL |
| 4A3X | 3CNR | 3LUU | 2WZ8 | 2J49 | 2X2Z | 1IBQ | 2PFY | 4B1C | 4IDL |
| 1LMQ | 2R2Z | 4IN0 | 2J3S | 2DBN | 1C0T | 2VGN | 3L40 | 1QVJ | 2W70 |
| 3JT0 | 3R5T | 2V9S | 1ZDE | 3AG9 | 3TRE | 1HYP | 2WJ7 | 2NRT | 1L0C |
| 3KR9 | 4HGF | 2QHA | 3FI8 | 2D81 | 20Y0 | 3D4W | 2BYG | 2GGS | 3RG0 |
| 3DCP | 3P43 | 3CSP | 3LVZ | 10PD | 3P6A | 1X1R | 4AR0 | 3D14 | 3BR8 |
| 1T6E | 3HEN | 4AQ0 | 1IJR | 4ETX | 1N11 | 1EYA | 1IV9 | 2YN0 | 2ACY |
| 2EJ9 | 229L | 3EC1 | 1XMC | 2GG6 | 1H8L | 3V7B | 2NWY | 2NYU | 1QS2 |
| 1BNE | 3T7V | 1TR2 | 3QYP | 3LW2 | 3ESS | 2V09 | 2MGE | 2ZYC | 3SUM |
| 4DNQ | 1WCQ | 1EVQ | 4F13 | 3HC7 | 30T9 | 2APJ | 4KVR | 1ZCB | 1Z0F |
| 2C7S | 3QAY | 3UL3 | 10Z6 | 1GFH | 1ZVJ | 3TQQ | 2Z70 | 1JKC | 3RVM |
| 1L11 | 1MAC | 1HSE | 1XGW | 1G0J | 3TTJ | 4GXQ | 2RN2 | 1ZR5 | 1QAZ |
| 3BH4 | 1M8A | 1CUF | 4HNO | 1A8Z | 1D2K | 1QQC | 2WLB | 3UPE | 2B4V |
| 4FGV | 4LIP | 2QP3 | 2A6V | 1QPD | 1TP7 | 3HD2 | 2Q98 | 3K89 | 3LPY |
| 10B3 | 1A06 | 1BJ9 | 4DXG | 4F8L | 2I0V | 1UR4 | 2ZWI | 1GF3 | 203F |
| 2PF5 | 30EN | 3D02 | 1ZEL | 4D8L | 4E80 | 3001 | 2G0F | 3MUS | 2VZC |
| 1MD8 | 1H1X | 4F0F | 3KD3 | 2WM8 | 1ICP | 3TG4 | 3QB1 | 1WAD | 1MQB |
| 3VPP | 3UJD | 2P2J | 1I5G | 4HL4 | 2YX0 | 1XKH | 3TM8 | 2QR3 | 2WA0 |
| 4G1H | 1IP2 | 2GVU | 4F9U | 2Z9T | 3EKB | 1Y4Y | 1NI0 | 4EMV | 3SV0 |
| 1CGV | 3P0E | 2BJH | 3MGA | 2LIV | 1DQG | 1UMH | 3CBN | 4B6G | 3SI1 |
| 3LWX | 3ZQX | 2APR | 1ZYV | 1ZVK | 1KUX | 4IG0 | 3GWF | 1THX | 1W34 |
| 3AK5 | 2Q05 | 4GIH | 3P1I | 10BV | 4L1M | 1TZD | 1GE3 | 2EX0 | 3LAW |
| 4BI1 | 3KNS | 1JHS | 10ID | 3DLM | 2XKG | 1DV2 | 2GFG | 4AQS | 1FFC |
| 3CT5 | 3I3C | 1QTB | 2003 | 3A8T | 1W90 | 1YZL | 3MJ1 | 2F1N | 3U0R |
| 1YWR | 1YI9 | 1MX4 | 1E05 | 2BB6 | 3P74 | 30ST | 3P9Z | 1Q36 | 1HTZ |
| 3C8D | 1SFH | 2VAK | 3D5V | 1BPE | 2A90 | 1GH4 | 3QVP | 4FXL | 2J22 |
| 1NRF | 3BQK | 4DQJ | 2WZL | 3U3L | 1LF5 | 3GC2 | 1MTZ | 2FFI | 3EJW |
| 1F0M | 2H0T | 2Z2U | 1VQZ | 2CD7 | 1G9J | 2R5S | 2ZY0 | 30LH | 2X7B |

|      |      |      |      |      |      |      |      |      |       |
|------|------|------|------|------|------|------|------|------|-------|
| 1L00 | 3PJJ | 1Q2L | 1LK0 | 3GX8 | 1DKL | 3PDG | 3QFC | 1QJV | 2F8Y  |
| 1CM3 | 1LFH | 3Z0R | 1TT8 | 2R61 | 4AMM | 1EYP | 3EBV | 2CB3 | 3CYM  |
| 3HXW | 2G0W | 309N | 1ID0 | 20XT | 2QRU | 3N60 | 2W4J | 3PZF | 2X0M  |
| 3JXV | 1G49 | 4KHV | 2JD9 | 3ZSE | 1DDJ | 3M00 | 2IGV | 3KAC | 2VY8  |
| 4ADP | 4HV0 | 1T4Q | 3AG7 | 2PD8 | 3U4K | 1LB9 | 1D0Y | 1STQ | 2QSK  |
| 10FL | 3H1T | 2FNW | 4HJH | 2C83 | 4M53 | 2W91 | 1US5 | 3VHG | 102L  |
| 2G0D | 200M | 1TPY | 4AV9 | 3F0U | 4D86 | 2BYV | 1GB5 | 2J09 | 1UAI  |
| 3K6I | 1K7Y | 2F23 | 1PK0 | 1W6K | 2B0A | 4A80 | 4DG5 | 2YXC | 2NVP  |
| 2ERA | 4H4N | 4IXE | 2Q0D | 4E4B | 3NCW | 1DMS | 3K0F | 3NSC | 1ZIV  |
| 2H7W | 2D1Z | 2IYL | 1FG4 | 2YKK | 3IPC | 4FVR | 1MLU | 3HZ2 | 1E18  |
| 3BUL | 3QFP | 20P2 | 3B0J | 2XD3 | 4GQ7 | 2J0P | 1AZL | 1LFW | 3UV4  |
| 2CI1 | 2DE3 | 1BF2 | 1HY5 | 4FJQ | 1CB6 | 4AHG | 1LU4 | 3PYF | 1PS9  |
| 1E6Z | 1WSD | 3HUT | 2WWC | 3I2E | 3H7M | 3N8I | 2R8U | 3MTS | 3GK6  |
| 1PQ7 | 2WFG | 2Z2E | 3FA7 | 30C6 | 1V6Y | 2HCU | 30NC | 2PQG | 1U2Z  |
| 2ZAA | 3B86 | 1PPA | 3C7L | 4IQK | 3DV9 | 3UP8 | 3MYC | 4EPP | 1KXF  |
| 2Y3U | 200I | 4AKP | 1YWF | 2ARY | 4BCZ | 2GNP | 2PIA | 1QI3 | 3Q7Y  |
| 1N45 | 1LOU | 2ZJ0 | 1BR2 | 2ICS | 2QX3 | 1KT6 | 1G6L | 4F3H | 3G5C  |
| 3U10 | 3T49 | 3DKG | 1ZRZ | 4GV2 | 115L | 2BXX | 4D9V | 1Q73 | 2QLC  |
| 3BIY | 1Z6M | 2WHK | 3SMZ | 3AZY | 2JCP | 3AU2 | 3IQD | 1R44 | 3UKJ  |
| 2RE0 | 1CIK | 1CH7 | 1G1T | 2XH8 | 1M61 | 3QLN | 3FP5 | 2MGB | 4FC2  |
| 1J7K | 1J0W | 1EHC | 4J6H | 4EII | 2QX2 | 3C82 | 3L08 | 3MU7 | 1D5T  |
| 1GNY | 1ZG4 | 2BIV | 2WX2 | 3AQU | 1AYD | 2PTH | 3P00 | 3HMV | 3B3R  |
| 2ZZZ | 1V0W | 2X0D | 4H3M | 2P8V | 4EEU | 1EFT | 3ILZ | 3VTG | 20L2  |
| 2PF0 | 1KY0 | 3BAU | 1S4Q | 1AVT | 3GZK | 1CUW | 1IWJ | 205R | 3CG1  |
| 2DYJ | 1JD9 | 2WGR | 1I5P | 3RKP | 3ETI | 3Q2D | 3TPK | 1GWT | 1UA7  |
| 3E9E | 2JHN | 1WF3 | 4B47 | 3CXG | 3V44 | 1ES6 | 3I9Q | 1H4G | 4ILI  |
| 3FRN | 3LA1 | 2V5V | 3A4X | 3G98 | 1U6T | 3MA6 | 3PT1 | 30M7 | 2DRR  |
| 2V6V | 1IYN | 3P67 | 1UD2 | 4F3Q | 1NQJ | 2VSF | 4FKD | 1QUI | 1SCH  |
| 3QU5 | 3JWG | 1BH2 | 4F9Z | 3TEW | 4FQE | 1U0H | 3IP5 | 20C5 | 3MNQ  |
| 4EX4 | 1SMD | 1BSW | 9MSI | 1FMV | 2ZPQ | 1W8W | 2P0C | 2GKL | 307T  |
| 3E2N | 2BVZ | 3DWM | 1DY2 | 4J0D | 3NZL | 1DK7 | 3SUB | 3FWH | 1ULW  |
| 2BDI | 1NTN | 3II0 | 2Q22 | 300A | 1YVR | 2VH9 | 1DS1 | 3HCJ | 1DG9  |
| 4H1N | 2YCU | 1HEQ | 1LB4 | 1GEV | 3SHS | 4ICI | 2E5V | 2GHA | 3BNC  |
| 138L | 2NQC | 2CXC | 3BNE | 1BQK | 20BI | 3TU1 | 3E4Y | 1WBE | 2Y LX |
| 3NNG | 2VPJ | 3QJ3 | 3ZXF | 1MQ4 | 3FGZ | 1K4N | 1N8Y | 3IQ2 | 3GJY  |
| 2Z0S | 2FFA | 2X4F | 2QB5 | 2IAY | 123L | 1M64 | 3QWY | 3FKM | 1BH6  |
| 4A9C | 1XWI | 4EFM | 2J5A | 3R0V | 2QJZ | 4JQF | 4AFC | 20DV | 1ATZ  |
| 3GSZ | 2YDM | 2Z2X | 1VCY | 2PWF | 1VEP | 1C9W | 3G1J | 10GJ | 3FJP  |
| 3NPD | 1H70 | 2JFE | 2GKG | 3K6V | 3KNY | 1GW0 | 2F0V | 1UA2 | 1L76  |
| 1HLB | 2VY0 | 1I7E | 1QKX | 4HMI | 4IPM | 3F4S | 3MFD | 3ZUI | 1SUP  |
| 2WY6 | 3S30 | 1N0A | 2W6X | 3G9D | 4KH0 | 1B6G | 1VRM | 2AIE | 1ENH  |
| 2A05 | 2RB8 | 1Z2A | 3DAS | 1EY8 | 1KF0 | 3SJ0 | 1RLW | 4DWE | 3JQW  |
| 4BIR | 1KQR | 1QRZ | 2QP2 | 104Y | 1XTP | 3QAX | 214L | 3H04 | 3UJ9  |
| 4FMS | 2F4E | 3PMG | 3SQF | 3F78 | 1J1G | 1SXW | 2X1L | 1U53 | 3LX5  |
| 4AHE | 1008 | 3P0B | 3GEF | 2KZM | 3PJX | 3G07 | 3B06 | 1XTD | 3PBK  |
| 3SIG | 1H2Z | 1S07 | 1FTK | 118L | 1XJ0 | 1DQ7 | 2G6B | 3EMX | 4DSD  |
| 1PCV | 2HJ0 | 3GXW | 4EQB | 2XXK | 2D44 | 2MEF | 3ED5 | 1KS8 | 3L8C  |
| 2XCL | 4FHX | 3ILN | 1VHN | 3SZE | 1SZN | 3PTD | 3FBL | 3N08 | 1MDQ  |
| 3Q9S | 3CTG | 2Y6L | 3CQT | 1L03 | 3UBH | 4J4Z | 1VD3 | 3RFN | 3C9X  |
| 1GFU | 1KGE | 1F0B | 2X45 | 2PQ8 | 2Q3F | 2XJJ | 1SN4 | 1R1M | 2QK1  |
| 4GZM | 1E5W | 1QZY | 3A03 | 1F42 | 3V0F | 2VN9 | 2WZM | 2HHL | 2FD2  |
| 4A14 | 2YW8 | 3TE6 | 3Q67 | 3IHF | 1CC2 | 3H7J | 3K01 | 3V09 | 1ENC  |
| 2EYQ | 2YYX | 3JUH | 4AV4 | 3V3R | 2C30 | 4JBF | 2ZRE | 3ECR | 1C96  |
| 1WNI | 2ITE | 2VH4 | 1BRG | 2AJ4 | 1CEC | 2Q04 | 3EYP | 4ATL | 2IN9  |
| 3UF4 | 2WHG | 3JRK | 30G7 | 3GBG | 3W0K | 1SHX | 1IGR | 2RCK | 1USW  |
| 10ZN | 3FGB | 3TEY | 3ALK | 1GBE | 1VKZ | 1CK4 | 1GTG | 2R2Y | 1P46  |
| 1E9M | 2HEN | 3TC0 | 1FMT | 2GF7 | 1V3J | 1TXD | 2HV6 | 3HLZ | 2NT2  |
| 1QX1 | 20X0 | 3D8P | 1HT6 | 1T8K | 1L67 | 30LY | 3BN6 | 1VF0 | 3CKL  |
| 3I11 | 3PKV | 3HGB | 3BFV | 3GFV | 2HEL | 3UI4 | 3QUP | 2VN1 | 3LQH  |
| 1B0M | 1XDF | 4FC9 | 1R70 | 1BM8 | 3VM7 | 1AU9 | 1PK5 | 2XYC | 1RTQ  |



|      |      |      |      |      |      |      |      |      |      |
|------|------|------|------|------|------|------|------|------|------|
| 2R7Q | 3PU5 | 20TD | 1JFX | 3H8N | 1HDI | 1HEM | 3PZ7 | 1914 | 4G00 |
| 1SUU | 1SYK | 1W80 | 4F3P | 2QGN | 1Z70 | 3BW8 | 3D3M | 3RAY | 3TPD |
| 4IDV | 1HZF | 2GPJ | 1LYH | 1PU7 | 3HJE | 2D0K | 3BZB | 1QS9 | 1WK0 |
| 10T1 | 3FCZ | 2IQ1 | 1IOQ | 1RUW | 1C09 | 1DIX | 1X0T | 3BJ5 | 3Q52 |
| 1FKX | 3VAW | 2J0L | 3EGE | 4GIO | 4FB2 | 1EH6 | 4A4X | 1FAS | 30S7 |
| 4HTE | 20ZU | 2R77 | 1GZR | 1CEA | 2QFF | 1RQC | 2WEF | 3PWB | 3IBZ |
| 3QK1 | 2Q0D | 1XE0 | 2Q1F | 145L | 30J0 | 1M4B | 2FI9 | 3MY0 | 1YW5 |
| 3DLV | 2D1S | 3N8L | 2QZJ | 1R26 | 3VJ9 | 1PG4 | 3H4M | 3ID1 | 4GGC |
| 1N1I | 1HQT | 1AS0 | 3G0H | 1KW2 | 3ZR8 | 2Y8K | 2F0H | 4IXF | 112L |
| 157L | 2VVG | 10XS | 1B8R | 1KCK | 1EL1 | 1JCF | 30NK | 4DZ1 | 1RBS |
| 3NR5 | 3UYX | 4FZ4 | 3B0T | 3BQQ | 2E4T | 3AMS | 104L | 3QWX | 2FL7 |
| 1M55 | 2ZUH | 2BX5 | 1TT0 | 2XH6 | 1XBI | 3K0B | 2PVJ | 3QF2 | 4DFA |
| 1PIG | 1ZSL | 2CMW | 1Q9E | 303J | 3AHY | 1R5B | 2WSK | 2VUZ | 3UK0 |
| 1M2K | 1YQ0 | 4H4A | 203R | 3LYR | 3E0I | 3T08 | 3ITP | 2XH3 | 1L1N |
| 3CIA | 3B0R | 2A3R | 2QT6 | 1L2P | 3VF1 | 1R1H | 2P9W | 1YW9 | 2YXY |
| 1CDY | 3BVM | 4GU5 | 3MBT | 2Y8F | 240L | 2QJ6 | 1VJ1 | 3CSS | 134L |
| 3FIM | 4IAX | 1U5G | 3H5E | 1PTY | 2WN4 | 2W2J | 2FJ8 | 2WLW | 3ADY |
| 1A54 | 1CUX | 2D2S | 4E0A | 2XUT | 2BQD | 3FJH | 3G6M | 1PGV | 3GNE |
| 1KDJ | 3ATV | 3F8V | 3RP9 | 3MHB | 1VJK | 3F3B | 20UG | 3TEF | 305X |
| 3SB4 | 3CH3 | 1UUH | 2QXI | 2Y6H | 1UDX | 3FH2 | 1L64 | 3TSH | 1FN5 |
| 4DIU | 3FWA | 2IGP | 3DKE | 3QPK | 2B0N | 4EUY | 3ME5 | 1C52 | 1Z9X |
| 3ORM | 144L | 2CD0 | 2MEG | 1GTK | 3ZYQ | 1G83 | 1HJS | 1R75 | 4H7W |
| 114L | 2CB0 | 2D7I | 2CF0 | 2PVU | 2VDF | 2IU1 | 3F6R | 2H5P | 3KSN |
| 4EXL | 3S9B | 1AFC | 1CU2 | 3NIT | 2VAD | 1DS3 | 1M2X | 1CQQ | 3008 |
| 1IU9 | 1XR6 | 1PBV | 3V10 | 1LHK | 1MTI | 4JSA | 3R9K | 1CXL | 3H9M |
| 1AZ1 | 2FR3 | 1STB | 4AJV | 3RL4 | 1NNT | 3DFJ | 2PLU | 2IF2 | 1KLT |
| 3VJD | 1BSD | 1LZV | 3FF0 | 3Q5Z | 3UFB | 1XTQ | 1LKF | 2FCS | 2FMU |
| 4IDC | 1AMJ | 2D02 | 3C1R | 3CLW | 3IKB | 1WA0 | 1GB8 | 2WZ9 | 3HKY |
| 2X08 | 3ZXJ | 1U09 | 2ZJJ | 1ZYN | 4FUS | 3TSG | 3GCZ | 3TUA | 4DQA |
| 1SI7 | 3HH8 | 2Z0Q | 1X1I | 3IWO | 2D4D | 1B6A | 2H5E | 2VJW | 1F24 |
| 4J33 | 1AJ0 | 2WY4 | 3DDK | 1RMG | 4JC8 | 1JRY | 1L6Z | 1W40 | 3H5K |
| 2V6J | 1SNM | 1VZX | 3AKM | 3M4V | 1C9N | 10C7 | 3W28 | 3M7G | 1F5N |
| 3TQL | 2B8X | 2C1W | 1K1S | 1B20 | 3N0E | 4H7B | 3NYC | 3F5V | 1YI6 |
| 1QTC | 2F2Q | 4AHK | 3LMG | 3PLS | 2EVB | 4J5H | 3DFI | 4DX2 | 3PVC |
| 1AGY | 3F44 | 4I00 | 3RKG | 3V3D | 3RK6 | 1IDK | 2EW0 | 1B7R | 4GK9 |
| 1ESW | 4HXY | 3SNV | 2HXP | 4FLO | 3LW0 | 2RI0 | 1I6S | 2I5T | 4AIV |
| 1TAD | 3B0D | 3P30 | 1I2A | 1BFE | 2YG9 | 2AT3 | 1W2P | 10MY | 3NXU |
| 2YKD | 4AHM | 1PC5 | 2W62 | 1VKW | 1CCU | 2HL7 | 3CKW | 1FVG | 1L8Q |
| 4F5B | 3Q6D | 1GNL | 4H5G | 3MNI | 2Y98 | 2Q5E | 1HGW | 2WTS | 5EAS |
| 3TQE | 4I53 | 3Q6V | 1W9I | 1N67 | 2Y8D | 3R5L | 3H93 | 3T0I | 3MZ5 |
| 2A14 | 2P04 | 1T2H | 2J21 | 3C38 | 1MH7 | 3U6J | 2XTP | 1FFE | 3S6C |
| 306P | 4FFG | 2Y1V | 1DNP | 3GVZ | 3TKB | 1WDU | 2VXR | 3QC2 | 4F10 |
| 3KX4 | 2PFT | 3HVM | 3K1Z | 2QSA | 3PIV | 1HV0 | 2QPW | 10XD | 4E72 |
| 1RXT | 1R86 | 4HTW | 3PHH | 3DSM | 4GV1 | 1MBA | 3AXD | 3I76 | 3TP6 |
| 2FCL | 3KB9 | 3CMZ | 4HWC | 3MWF | 4F78 | 2EXZ | 200B | 1JK7 | 3FRR |
| 1Q1U | 1MYI | 1HW6 | 10RC | 1J9E | 1PJ9 | 1N5N | 3KCS | 3KH5 | 3RFA |
| 4JCO | 4HBS | 3MXX | 1WY7 | 3BA7 | 3B44 | 1ZT3 | 3N7L | 1E62 | 2NWD |
| 1TDY | 1DJB | 4A05 | 2JKM | 1NA3 | 1DDW | 1N82 | 3ESU | 2AIQ | 4F42 |
| 1F1Z | 1R3D | 3RSB | 2Z2N | 3JUX | 2068 | 1IKT | 30A3 | 3DQ7 | 1LR6 |
| 1Z5V | 4L1N | 1B7M | 3DAN | 1L81 | 2X1Q | 2SP0 | 4H0A | 1V2W | 1CXV |
| 1NTG | 1HCZ | 1L42 | 2W69 | 3TTN | 1S09 | 1XEZ | 1DYG | 3HKS | 1UHK |
| 6PAZ | 3M3G | 2R4B | 3TAW | 3CJM | 4E2W | 1XTK | 3SLH | 2GJP | 2JIL |
| 3QT4 | 3P28 | 1GUI | 2IHL | 1W1D | 2PVX | 3A0J | 4A2B | 2HYK | 4GLP |
| 3DU6 | 1LFO | 1KS3 | 3UXU | 1FUE | 3BL5 | 3HAK | 4FDY | 2CM1 | 2HEE |
| 1BFF | 1Q1Y | 2R31 | 1KFR | 2ZZI | 3QD7 | 3G0E | 4E2P | 3FY1 | 3016 |
| 1YD2 | 3GV0 | 2P8R | 1SEN | 1SQG | 3MAM | 1HEA | 2YYZ | 8MSI | 1W0N |
| 4AA9 | 30AN | 3MJV | 1VJS | 2WFT | 2PE8 | 2B3H | 2XJ4 | 2YD0 | 2L78 |
| 4E4P | 1J8Y | 3QBE | 1Z9T | 2DYL | 2UWA | 1KBB | 1XK9 | 1TUA | 4FI5 |
| 1Q9C | 1SIU | 1ARB | 4FCF | 1TH0 | 2EC5 | 3LL1 | 3ZY0 | 1F2Q | 1CNG |
| 1ZBF | 4E9L | 3DXL | 3GG7 | 1P9Q | 3DGT | 4FBE | 1K6K | 1Q9I | 3AWM |

|      |      |      |      |      |      |      |      |      |      |
|------|------|------|------|------|------|------|------|------|------|
| 2V26 | 3E6J | 2WF1 | 4A4A | 4HVD | 3NJT | 1CZK | 1G6C | 1BYQ | 10K0 |
| 1KXW | 3T66 | 1PKF | 3CEC | 2MEA | 1B9W | 241L | 4DY3 | 3NX0 | 3QWW |
| 4AZW | 4B70 | 4HEF | 3W4P | 1P2F | 258L | 3HMI | 3INA | 2R40 | 1TH0 |
| 2WMH | 1VJW | 2QPS | 2CXA | 2RHP | 1XDN | 3ZXL | 4ESM | 3I0S | 2VWD |
| 1BCY | 3GLJ | 3NXP | 1FVI | 2BUE | 4AD8 | 3PH2 | 2YD8 | 1ESI | 3MEW |
| 3P5U | 3M66 | 1DS0 | 1W32 | 10QQ | 2MBR | 3FJZ | 3JVL | 2Q0I | 4KDS |
| 3GF9 | 3N5A | 1Q03 | 1U84 | 1CNE | 1T2J | 2P8E | 4J0M | 1NJ4 | 1A0I |
| 3ZSN | 3I4L | 3V0C | 1QUS | 2WLP | 2Z4T | 2QXZ | 2ZQ8 | 2FX5 | 3CIG |
| 1JV0 | 1M20 | 2PNM | 1J08 | 2XR9 | 3PRY | 3DXF | 2Y88 | 3EQ5 | 3012 |
| 2IQY | 1FRM | 3MKT | 2BG1 | 3C5M | 3FV0 | 3UN5 | 2J20 | 2Z2F | 3JZY |
| 3Q6L | 1BG2 | 4GBM | 4DY5 | 1MX6 | 3HZ7 | 2DU0 | 2F8Q | 2B7A | 2FXU |
| 4HZ8 | 1G30 | 2DPK | 4JJA | 195L | 1B5Y | 4FH1 | 1A0L | 2BW8 | 1B7K |
| 2P2Y | 3MVR | 4DGJ | 1MMA | 4BKJ | 2V3G | 2RH8 | 3I48 | 2FCR | 2FGT |
| 2PVT | 3M6Z | 4I5J | 4F4C | 3IIV | 3M0U | 3L01 | 2RCI | 2FGZ | 4FFH |
| 2Z80 | 4EJI | 3DTM | 2ITV | 4GWE | 2GKR | 4GRZ | 1B7P | 1BQC | 2FRG |
| 2A8E | 4F40 | 1N2Z | 1VKU | 4KQC | 1L26 | 3S01 | 4DIM | 1070 | 3SE0 |
| 4IU8 | 2HBW | 3D33 | 1EU8 | 4KU4 | 3NXF | 1ENI | 1RI5 | 3060 | 1BIR |
| 2APB | 3S5F | 2FLH | 1EBT | 1GAZ | 2V7F | 3K0X | 2B4A | 2ECE | 2PET |
| 1GIU | 1TZZ | 1QST | 4DW4 | 3BAD | 4EQ3 | 4F1P | 4PBG | 1MLL | 3D5L |
| 3DK3 | 1I76 | 3JSN | 3CER | 1VL5 | 4K2K | 4AEK | 3A08 | 4H07 | 1RP5 |
| 1BAG | 2RC4 | 2RDF | 3QT9 | 2FFZ | 2IYF | 2NZI | 1Y9L | 1S6R | 2F0K |
| 100E | 1CJW | 1M4K | 1FKQ | 2QTY | 10J1 | 4E0D | 2G7C | 2R4Q | 1U0Y |
| 30G3 | 3L9S | 3U62 | 2Q9E | 2WB7 | 2PTU | 4DBX | 4FQT | 4FH0 | 3N5K |
| 1C3F | 1G0Q | 2Z9Z | 2QUZ | 3L1Y | 4JZU | 3GUI | 3HBW | 3FYQ | 3B1X |
| 2G5R | 3S1D | 2GX0 | 4DPZ | 4J1M | 2D48 | 3TC8 | 1KEH | 1ZD8 | 3T9M |
| 4KDX | 1Y0B | 1CPM | 1NPC | 4IMV | 3KY9 | 2X9K | 1QIL | 4ISC | 2Y9F |
| 1NPI | 1JWV | 2IPI | 1HK3 | 1BB4 | 3RWX | 10DV | 2ZE9 | 2E3U | 3I6I |
| 3ZX7 | 3C7Y | 4ACR | 2W74 | 2W0E | 10A3 | 3V03 | 1LQY | 2BQM | 1PHT |
| 1EZ3 | 3D60 | 4F8M | 1HHL | 2DRQ | 3RJN | 3GP7 | 4AN3 | 1F7C | 3V5C |
| 1LHM | 4A99 | 1ZM8 | 2YLF | 1V0L | 3CZC | 2HTA | 3SFZ | 1Z6T | 2Y2F |
| 1FIO | 1U9A | 1QTH | 1HEN | 1I0S | 3NRY | 4JBJ | 4I96 | 2RBT | 1NPS |
| 3RWL | 3EDU | 1J7A | 2DZX | 1GIQ | 4A2P | 4DIF | 1XSZ | 4GVV | 1VEM |
| 2HK5 | 2RC7 | 3DIV | 1ZVG | 1M09 | 1Z0V | 3SEW | 1P77 | 1NI3 | 1ZI6 |
| 3Z0N | 4BHC | 3T16 | 2PDU | 4ALZ | 4IUN | 2ACG | 1JC1 | 2PD9 | 30UE |
| 4ARN | 1NQZ | 3S83 | 2XTQ | 2ZQ0 | 3FVV | 2FJI | 3M70 | 3RY4 | 20K5 |
| 1XLR | 1WMK | 1EUG | 4DU2 | 1L49 | 1GVY | 2W98 | 4K8V | 2B4L | 2F0F |
| 3GT5 | 3HL1 | 3H2G | 1FRN | 2XZG | 2R44 | 3PP0 | 4JG3 | 3QVE | 3DTQ |
| 4B53 | 1VAH | 1KM8 | 4JNF | 3HRL | 2PQI | 2CHF | 1NH6 | 1ZZK | 1DD6 |
| 206A | 3GYC | 3V39 | 1E69 | 3L4C | 1MKY | 1YQE | 2ZJ7 | 1MYH | 4F0C |
| 2XA4 | 2E4Q | 4E07 | 1L54 | 4IRX | 3SFT | 2EC8 | 30KZ | 3E2V | 1UNQ |
| 3GDE | 2Y1Q | 2NUK | 3PE6 | 3UMN | 30RK | 1UIC | 3FG2 | 1PQ0 | 2CYX |
| 3FCE | 3SWG | 3JUJ | 3FJK | 1KQJ | 3PUR | 3V34 | 3TLP | 1H8N | 2DE2 |
| 1M8T | 3TVZ | 1LOY | 4GLK | 10BM | 2QK4 | 1IA6 | 1SUC | 3QL6 | 2AG4 |
| 2Y3T | 3UZU | 4DMY | 3LJX | 4KQ9 | 3DKC | 3A6T | 1G90 | 3P4L | 1GFJ |
| 1TG7 | 2RDK | 2DR0 | 3ESX | 3NZ3 | 1NIS | 3TNY | 2G3I | 133L | 3ZVL |
| 3BRS | 2GDJ | 20CH | 3FJI | 2ICC | 1H6X | 1UHA | 3SK7 | 2AIU | 3VC0 |
| 3ZM6 | 4IVA | 1BD8 | 2AGK | 2Y8U | 3CNJ | 3PYA | 2YE1 | 2HQ6 | 3T0P |
| 1Z3X | 3LKM | 2J8A | 2036 | 1Y08 | 1M6M | 2E84 | 4I3N | 3B1V | 4JBU |
| 2HIS | 3IDW | 2H5F | 3ZXY | 1MLG | 3UR0 | 4HD4 | 4HXC | 3A35 | 3ULT |
| 30WV | 3LHE | 1ZIX | 3MD2 | 1CNV | 1VK3 | 3SV8 | 3R0X | 3AU7 | 159L |
| 1K5C | 1KP6 | 3NSY | 2XA5 | 3HH6 | 3IK2 | 3R4V | 1JAE | 4IE5 | 2VKR |
| 2H1A | 2HRG | 4DN0 | 1JKB | 4AKL | 4E9S | 1Q1Q | 2GUF | 1PQJ | 3P0C |
| 3E3V | 4ANV | 4DCA | 1GB0 | 3R63 | 4AY7 | 4FUH | 2HPJ | 3LZ3 | 4G3G |
| 2XT3 | 3FB2 | 2VTF | 3RZF | 2UYX | 1VF8 | 1TFD | 2PL6 | 4FQG | 3QCN |
| 3MHZ | 2EKC | 1MID | 4E36 | 2XMX | 3Q0N | 2B8U | 30WQ | 2FZU | 2VKI |
| 2MGG | 1GF0 | 1EMR | 3KA2 | 1D4Z | 4JDF | 1NGD | 1UUQ | 4DCG | 1R2E |
| 1GBZ | 3RGA | 2QKQ | 4HW3 | 4FXQ | 2Q00 | 3GEB | 1I0N | 1HER | 3GQS |
| 2PK0 | 1KD0 | 2IAP | 4HTR | 1RJ6 | 3RH0 | 2XED | 4BA6 | 1PV5 | 2NLY |
| 7A3H | 206L | 3NPH | 1KMV | 3M7M | 4FMW | 1XK0 | 3TQW | 3Q1H | 2FH1 |
| 2ZXR | 1WU3 | 1YMR | 1PPI | 1AD6 | 2W40 | 1QTZ | 4F0Z | 1IU1 | 3D1P |

|      |      |      |      |      |      |      |      |      |      |
|------|------|------|------|------|------|------|------|------|------|
| 2ZF9 | 3U7E | 1ZSW | 4IDH | 1CNJ | 2FIY | 2YHX | 1ZZW | 2PEF | 1VI5 |
| 4FC8 | 2XET | 3MYX | 2F9F | 1B2Z | 2H4V | 3APA | 4EIU | 1T3S | 1X89 |
| 3UWI | 1ZND | 2VK3 | 3WB8 | 41BI | 2HLY | 2DWR | 2GIV | 3MY6 | 2IJX |
| 2AJA | 2XHA | 4AI0 | 2WB9 | 4EGD | 3BQF | 1SFS | 3ABA | 2X7G | 2VB1 |
| 2VHK | 2DCB | 1VCD | 1JJF | 4EF0 | 3USP | 1UKT | 3NBM | 1LUE | 2C9R |
| 2HAU | 3NRS | 3M5Q | 1IAP | 3NG0 | 1JGJ | 3KWU | 1JC9 | 4I0U | 1G9G |
| 2VVD | 2C8A | 1PUJ | 1HV1 | 1L77 | 3CW4 | 2W20 | 2NLK | 2PGX | 1P2E |
| 3R4R | 3A77 | 3NUL | 3DJE | 2QQJ | 3C8R | 1FDR | 2BQE | 2JCB | 1I0T |
| 1F1F | 2XHC | 1RBT | 2HAI | 1F9U | 1NAR | 1W7B | 4A84 | 3LCD | 2PVE |
| 2BM1 | 3JWQ | 3MBR | 4HYQ | 2QNG | 3F9E | 2ZXQ | 3T7A | 3B5E | 4HMJ |
| 3H7I | 2E22 | 3MTX | 2Z10 | 1W8U | 3NX6 | 3IW4 | 1RN1 | 3Q00 | 2WHJ |
| 3FM4 | 2YPH | 1SRA | 2ZJ6 | 3JXG | 10R3 | 1IUD | 2XJL | 1CCZ | 2XJP |
| 3LE0 | 3H0E | 2HWA | 3AXF | 4HTY | 3S93 | 1T5J | 1L20 | 2PL3 | 4F10 |
| 3VN3 | 2JGA | 1IAE | 1BEZ | 3F3Q | 3KS3 | 3DC4 | 4F0W | 1QHL | 3D6S |
| 3S8J | 3HAP | 2FTA | 4L05 | 1CRH | 205P | 300F | 1J7B | 2VQC | 174L |
| 1BYG | 3AIE | 2Q20 | 1LYF | 2NLR | 3EVR | 3LUP | 3HKM | 1L8F | 1NGC |
| 1WQP | 4DOU | 1NPM | 1QYI | 3CHJ | 3I7A | 2P4H | 1UIP | 1MMG | 3FLB |
| 3R9R | 1HX0 | 2HK6 | 4B6W | 20L6 | 1YNM | 4BDX | 1H03 | 3PUU | 20HB |
| 4K0R | 3NR0 | 1B89 | 3G05 | 3FSA | 4L0F | 3CEB | 302U | 3V9E | 2CLT |
| 2PDP | 2WMI | 1BSG | 2QU8 | 3QCW | 1W70 | 3GP3 | 306A | 1KEX | 1BP1 |
| 2PB7 | 2AE0 | 1B1Y | 3SR1 | 1G81 | 3UMV | 4K2L | 203G | 4GFJ | 2FD3 |
| 3S9J | 1UWC | 2MCM | 2HCG | 1FG0 | 3UCI | 20JH | 5PEP | 3JTN | 2GMK |
| 3JTP | 1R69 | 3SUV | 3VNR | 2I4I | 3BDU | 1CV5 | 1D2Y | 4K37 | 2AMG |
| 1ES1 | 3VMN | 2XRI | 1L36 | 1CNU | 2R2A | 3SIT | 3BEE | 3V6A | 4HBW |
| 4AS8 | 4KK4 | 3A7L | 3LFG | 1H04 | 3SWA | 3MRY | 1GBJ | 4I90 | 3JRP |
| 4DB6 | 1T91 | 1J1T | 1BFP | 1FQG | 1DYF | 1G4W | 1YCK | 2PE4 | 4FH0 |
| 4EIC | 1M7B | 4FQ8 | 4IUQ | 30V6 | 1B7N | 3IQS | 1AUE | 249L | 1A6G |
| 1GQE | 1WXR | 3MK9 | 2E87 | 3I6D | 203H | 2UZC | 1ITC | 1XTI | 3BW6 |
| 16VP | 1Y8A | 1NGH | 3PU6 | 2GQT | 2HJV | 3PXB | 2UY2 | 4KNC | 1N8I |
| 3A3C | 30CT | 306T | 2R5F | 1QMN | 4JIU | 3MPM | 1JDC | 3DEB | 3QQR |
| 3VVN | 2Q9X | 2WJY | 2XI9 | 1H9Q | 2B5N | 1LHI | 2UXT | 2ZQ5 | 3GEA |
| 1B68 | 3Q2E | 1AGJ | 2ESQ | 2W6K | 2D5B | 2VPN | 3FUS | 1JMM | 3K63 |
| 1K03 | 4A3Z | 1NCX | 4GIB | 1GE0 | 3GKZ | 10D3 | 3VLX | 2FR1 | 2B0P |
| 1B5W | 1Q8I | 1ATU | 2VYY | 3IL0 | 4EZJ | 2QDL | 1AB5 | 4AHF | 1BKM |
| 2GIL | 1WB4 | 3PYW | 4G8K | 1IN8 | 1HIP | 4FLQ | 3FVZ | 1KPG | 2G98 |
| 1HOW | 2DEB | 3VCO | 1GDW | 1ZL0 | 208S | 3DT5 | 30EP | 3LWT | 141L |
| 3UK8 | 3I77 | 1G4R | 3ZQ7 | 1NMN | 2G78 | 206K | 2V77 | 1X23 | 1GXM |
| 3L15 | 3ASH | 4IM7 | 3QCM | 2WBK | 1H76 | 1CAJ | 1ZZY | 4DBR | 1UA3 |
| 3A62 | 1E0E | 4GVW | 3M7A | 2V0S | 4I65 | 3F4T | 2ESC | 2FN4 | 4EVW |
| 20NU | 2V5U | 4HJF | 1P9Y | 4DGF | 3IG5 | 1QXA | 3US6 | 1J8M | 1X07 |
| 4GGA | 3I0X | 3URD | 2TIR | 1IT2 | 2CJZ | 119L | 3N12 | 30E2 | 3LPP |
| 10LL | 3FWG | 1MKU | 4E2T | 3A38 | 2WA7 | 4DFS | 207K | 2SQC | 1MNC |
| 4FL3 | 2XY2 | 2BPO | 1ECL | 2ID0 | 3IXB | 8AME | 2V2U | 1LN1 | 3KKW |
| 1HIB | 3D4E | 1S8E | 4F1M | 1JBK | 4J3D | 3K7I | 2C3Z | 1A0P | 1LSN |
| 1JWQ | 2RH1 | 3SK6 | 2RES | 3RI0 | 3GF6 | 2ZQV | 3URZ | 2GVX | 1IQQ |
| 1UGI | 1G0P | 1CS8 | 1KXH | 2XTL | 2GBA | 1N97 | 4A2Y | 3IB4 | 2PGG |
| 1RDS | 3FGM | 2DZS | 3N02 | 3H3E | 2YJ3 | 3JYB | 3QE7 | 2BIR | 3UYW |
| 3DSZ | 1IH7 | 3GRC | 2HW9 | 1VA5 | 1F0B | 2IHR | 2BF5 | 4FQP | 3BF0 |
| 1BUE | 2FVC | 1MI0 | 3LHI | 3E9F | 3GVA | 1G7N | 1ATR | 1WCX | 3BD9 |
| 1LZG | 2J6A | 1VQR | 4G4G | 2QGQ | 4H6W | 3K2T | 3SHT | 1E2W | 2Z0T |
| 1LLT | 1TMY | 2I1S | 3ZV2 | 3TU8 | 3KST | 1VR8 | 3IHC | 2Q4M | 4DWM |
| 3BCY | 2E6M | 2VQP | 2NW0 | 1GMQ | 2YZU | 2W2S | 3H3D | 1FZU | 3ETZ |
| 3QFT | 1DSE | 168L | 2V33 | 1HB6 | 20H9 | 3FXB | 1QBA | 2ZFU | 2R48 |
| 1GV2 | 4IGZ | 1WLZ | 1KYA | 3C8U | 4IFA | 155C | 1ZIN | 4I6K | 4B0R |
| 3PXA | 1Z7L | 1PCH | 2V14 | 1QGZ | 3MIX | 2WCQ | 3BVU | 3QZ4 | 4EK1 |
| 10UJ | 2Q0R | 1J09 | 4F8A | 1JQE | 1A0W | 3B1Y | 6CA2 | 3NEZ | 1KXE |
| 2N03 | 2I6V | 1LWB | 2XKA | 2H2Z | 3TGA | 3CKK | 1UKR | 4G0H | 4F72 |
| 30GN | 2R9U | 2RI3 | 3E0S | 2VJ2 | 2R4N | 1NG6 | 1QV1 | 3IEH | 1LIT |
| 2FPO | 2F8P | 2XXQ | 1R19 | 3UUE | 3AWQ | 2JG6 | 1PEX | 2VSP | 4I3B |
| 4BMA | 3ZIU | 1IFQ | 2EJX | 2H3L | 1D6Q | 1MB3 | 1PMP | 1AXN | 1J0S |

|      |      |      |      |      |      |      |      |      |      |
|------|------|------|------|------|------|------|------|------|------|
| 1K6X | 3K29 | 1VMB | 1N4A | 3MWU | 5CCP | 2C1G | 3IRP | 1YSC | 4HLB |
| 2XUF | 3FJF | 2OUD | 3AS2 | 3ZJK | 1NKR | 20EW | 2PZU | 3VU0 | 4GL6 |
| 3FHR | 1MYT | 1TIB | 1D4D | 3SK8 | 1WK8 | 160L | 2I7F | 1F03 | 1WZZ |
| 2VZ6 | 3TRG | 2BMF | 1KDB | 1ZX5 | 30LC | 1GCP | 2H8H | 4F8X | 1H4A |
| 1PM1 | 1C2R | 3VCF | 2WFQ | 1B3E | 1CU3 | 3NW7 | 2F4Q | 2DIE | 1SJX |
| 1JU2 | 1H08 | 3EE1 | 20N8 | 2P7S | 2Y4Z | 1H71 | 3SXS | 3SZ6 | 1B85 |
| 2Y8P | 1BX4 | 3ZVR | 4KPP | 3UVH | 4DVY | 3JUD | 2FZL | 3RDD | 2QLH |
| 1CSX | 1SMM | 3S08 | 3RC9 | 3GIA | 1BRI | 2JLI | 3P75 | 1QL6 | 3H0P |
| 2YQC | 2RKS | 8CA2 | 2YHG | 300W | 4AX0 | 30PN | 3II7 | 2HPS | 2WVI |
| 3PBT | 3AII | 3MCY | 3RZE | 1NAF | 3BAG | 1CH3 | 3L6A | 3DYJ | 3FJW |
| 1B5X | 1KSS | 3DHN | 3DEF | 2XTZ | 4F7X | 3SU0 | 4K5X | 1G0X | 2HZ3 |
| 2FN8 | 1R6B | 3K1H | 1HBK | 4B88 | 1VJD | 2EWK | 1HQ2 | 2J4T | 2Q3H |
| 2RG8 | 2WE1 | 4B8R | 1EDG | 1QDE | 2EF1 | 4HS9 | 2A0Z | 3W6B | 3ZKP |
| 1LAR | 1CZA | 4EV8 | 2QJC | 1Q1C | 2RA1 | 3FJC | 2H4T | 1QME | 3F8Y |
| 2PNY | 3NW0 | 2PYX | 2Q1H | 2WM5 | 3LIF | 2IW0 | 1NZ6 | 1N76 | 1HYF |
| 3BHH | 2YW2 | 1BA2 | 2P5P | 1CIY | 4AP1 | 2JIA | 1QCX | 2C2P | 2ZJK |
| 2WTB | 3H79 | 3B9P | 2V72 | 3V8E | 4FKE | 3CWG | 255L | 1SGV | 2YHV |
| 1JZB | 2X9H | 2QP4 | 3UN6 | 208L | 1BTI | 2KZZ | 2ICY | 1FLJ | 3VFI |
| 3MB4 | 1L45 | 3HN4 | 2PBL | 2C4P | 122L | 2YIH | 2TPS | 1N3X | 1F6W |
| 2EAE | 2Y70 | 4FD5 | 3V0C | 2Z63 | 2PTV | 2H72 | 4AVA | 2BSP | 2G09 |
| 3IR8 | 1XWL | 30H8 | 201W | 2I0Y | 1A2A | 1EAZ | 3UGF | 2CXX | 3ESY |
| 1X01 | 256L | 4F5U | 3BPT | 1QHU | 1Z0A | 2ABL | 3QR5 | 1Z57 | 1BY2 |
| 1PZ8 | 3S25 | 3TSV | 4K9R | 4IUP | 1V0A | 2W9M | 2QHP | 2WJ5 | 3S44 |
| 1HEC | 1T2U | 2CGH | 3FLG | 2F68 | 1QTW | 2WZB | 4JNC | 1NZK | 1E4V |
| 2VM1 | 2X20 | 3H5L | 1EUF | 2FY2 | 2PKW | 2VC8 | 3GPK | 1L07 | 1USH |
| 4FET | 2FDN | 2SHP | 2DW4 | 3M6C | 1SAU | 3ARX | 20FZ | 1M1Q | 2V73 |
| 3B5L | 1N01 | 1Z2U | 2Y7S | 1TJ6 | 1HEK | 1XFJ | 3Q5I | 1CY5 | 2ZNB |
| 2HWW | 3JYR | 3V3L | 2A1X | 3DVD | 1PTF | 3PT9 | 2NSM | 10IW | 1G0M |
| 2XMP | 1UXZ | 3CUI | 1MRG | 3IIG | 2PWX | 1SR8 | 2X4M | 1T85 | 3KHQ |
| 1B1X | 1FEP | 3VLG | 2NT4 | 3KLQ | 2PC1 | 2GK0 | 3ET0 | 1IRX | 3D09 |
| 1MRJ | 1SAT | 3REG | 2XZV | 1WYK | 3FMZ | 1SQY | 2QYK | 1SH7 | 1TTJ |
| 3W06 | 1V20 | 307P | 3B21 | 2YV4 | 200G | 1ICN | 1FT5 | 2JHM | 2Z5G |
| 3I11 | 2XBK | 1E0D | 2PRB | 4AMS | 2I5V | 2XVM | 3QEE | 1L14 | 2V5C |
| 3L5K | 4GZL | 3PZ8 | 4HTH | 3BC9 | 3L8E | 30DZ | 4EMQ | 4EYC | 1HU8 |
| 3QLE | 3RG9 | 2AHF | 2HDF | 3TBJ | 1W0L | 1EGU | 3GUE | 2GRJ | 4KG7 |
| 2YPS | 4EL4 | 30P8 | 3QIA | 3PE0 | 3SHL | 2AFT | 3URG | 1TJL | 3L11 |
| 1L21 | 4E2Y | 3F2E | 1IZD | 1K0E | 1Q0K | 4A4Z | 1XR2 | 3RA6 | 3FQ6 |
| 2Z15 | 2FDQ | 3H2I | 1WBA | 3SA0 | 178L | 2II6 | 1ATT | 1CPQ | 3BUS |
| 1IIU | 1WL8 | 1JN3 | 1SKJ | 1XMD | 165L | 2AGS | 1AF0 | 4JGT | 2R9F |
| 1XMT | 4DC3 | 3Q8E | 3B5P | 3S5E | 3VL9 | 2H6Z | 2WBN | 2BV5 | 1Q5D |
| 4I3F | 1C7K | 4FK7 | 1GCV | 3K2D | 3FK1 | 1T2P | 1YXS | 3EAZ | 3ED0 |
| 3ZH3 | 3TVV | 4F9T | 2ZQS | 2EYJ | 2VGE | 2WH5 | 2PGF | 30K0 | 3UMR |
| 4GD5 | 2VQD | 1FW8 | 1TA0 | 4A6P | 131L | 3QYZ | 1QUA | 2BWK | 1Q4N |
| 1ES3 | 2IWV | 1LSL | 1K2Y | 4FDQ | 1JFH | 1URT | 1MR3 | 3M00 | 3BT8 |
| 4JQR | 2Z81 | 3FB4 | 4L6E | 1G0Z | 3QKY | 4DMV | 3Q90 | 2FW5 | 3NBX |
| 3PXJ | 3R9F | 3T6P | 1E7U | 1Q20 | 1AH4 | 2EYF | 2H57 | 2JAY | 4AHL |
| 3RGZ | 2BKG | 3FRZ | 1HXI | 3AHN | 2CY3 | 3NQT | 2QGZ | 2X90 | 3OZZ |
| 2OUV | 4AWD | 2BGV | 2AC1 | 3TYQ | 2ACT | 1WDP | 3B2G | 3LCU | 3A9G |
| 1T9Q | 3FQG | 1EAN | 1DCC | 3KM5 | 3FGQ | 253L | 1PCA | 1RW9 | 4HD5 |
| 3VSS | 1KB3 | 3RSW | 4AUK | 3JZ9 | 1JPA | 3PB3 | 3L0V | 1QUK | 3H4N |
| 3SK5 | 1Q79 | 3F88 | 1ZIW | 4GC3 | 1CDZ | 3B79 | 3AQY | 4AQ4 | 10FD |
| 1J3A | 3QA9 | 3LX6 | 2WE0 | 4H2C | 30J1 | 1MNJ | 3ATR | 4F0S | 3E11 |
| 3UYN | 1XTF | 3A72 | 3HL9 | 3VU0 | 2AIA | 1U0Z | 1XKN | 20Y8 | 2DJH |
| 2ZXJ | 3NIX | 1T40 | 3AA5 | 1L5J | 1HYQ | 203S | 4IPB | 3BWW | 3SLS |
| 2Z8Z | 300I | 2AAE | 3A0S | 3JW3 | 3L2M | 2RIN | 1L6P | 3RVO | 3CBZ |
| 1M4A | 3TNX | 2Z4S | 3V0S | 4A67 | 3HJK | 2XWI | 3AL2 | 1T20 | 3GNL |
| 4H1G | 2I27 | 1IU5 | 10CB | 3026 | 1JFM | 3P2A | 1DI5 | 2QLU | 1TQ4 |
| 1HPL | 4EYU | 1XWT | 3AFG | 3CW0 | 3TX1 | 4E93 | 3ZYN | 3W30 | 2PSD |
| 3R5Q | 3LQ9 | 4AFD | 3M4F | 1EQJ | 3HMC | 3PT5 | 1KSW | 2UYR | 3FYS |
| 1TAY | 1BEA | 1BEQ | 2JC4 | 1Y1P | 2A3M | 3GH3 | 3LIG | 1WNH | 1FRL |

|      |      |      |      |      |      |      |      |      |      |
|------|------|------|------|------|------|------|------|------|------|
| 2RDV | 1KGF | 4K6D | 4AW0 | 3ELG | 3G0N | 1CRB | 3HY0 | 2H1Y | 3AP0 |
| 3IV0 | 3MZY | 1MGT | 3B0H | 3S8S | 1YD4 | 10XX | 4E76 | 2MEC | 3D59 |
| 1VFF | 2LBP | 3BUJ | 1V3I | 2Y38 | 4FL2 | 2PC8 | 3P97 | 3A7N | 2HB5 |
| 1JUG | 2I74 | 3DKR | 2FAF | 300U | 1NGB | 3ZVS | 1EYC | 4A0S | 1D5A |
| 2Q06 | 1CUZ | 1DTI | 1IZQ | 2W8D | 30S0 | 1ZZM | 3K50 | 20DH | 3PS9 |
| 1Y0K | 1QYR | 1DF7 | 2CZW | 1M2J | 4AZC | 3V0R | 3IIJ | 3CNY | 1QH0 |
| 1ES5 | 4GNQ | 2GS5 | 4AMF | 1GA0 | 3ZMM | 4GU2 | 10I1 | 4KVP | 2PQX |
| 1FPZ | 1KQ6 | 2HK0 | 3V3N | 30DR | 3MZ4 | 1WКУ | 1FQE | 3BSQ | 3D2L |
| 2YPU | 2XEE | 3RPM | 3CBQ | 1GIT | 2ZBI | 3CFZ | 1GSW | 1GHL | 1MMQ |
| 1DL2 | 2V3V | 4A1Y | 2C8E | 1N3Y | 3TW5 | 2PHC | 4EID | 1PUB | 3CB9 |
| 1DD5 | 1TCA | 3L0D | 3GU4 | 1I5I | 3DW0 | 3IEU | 2BTL | 3AFH | 1FND |
| 3S5Q | 1CNH | 1TEN | 3DMN | 1LOX | 2CWY | 1Z06 | 2QGU | 1C8X | 2F0Q |
| 3A4W | 3FRH | 1XW4 | 3KIV | 3VHQ | 1ELV | 3UJK | 4GXR | 2H5Z | 2V3U |
| 2MEH | 2IUL | 2XEV | 3JWH | 30DX | 1IRK | 2G29 | 3SG4 | 3E0D | 3UW0 |
| 1YHW | 30FE | 2PDB | 10EN | 1B24 | 1CRM | 2FDX | 1NB9 | 4E19 | 2IIP |
| 128L | 1RQW | 2P5I | 3049 | 2RJB | 2AIF | 1TLY | 2037 | 3LRA | 3KPK |
| 3BSH | 2IQJ | 3NK9 | 1BEM | 1BHE | 2X6T | 3QXF | 3IC0 | 3ZRH | 2FM9 |
| 3U1L | 1L1L | 1LMH | 1HMY | 1IIB | 1W66 | 2FWH | 3DIT | 3BCN | 3IUZ |
| 3FE0 | 3SK9 | 3FAC | 2GAI | 1CH0 | 2V3Q | 3B9E | 3EGB | 2R2J | 3CHM |
| 4GVI | 3AS5 | 3TH5 | 3MSV | 1LSM | 2KFN | 3UTO | 1I10 | 3ATG | 1W0J |
| 2W9H | 1DYM | 1PQM | 30NJ | 2H60 | 1RDB | 1WVN | 3CUZ | 2YLR | 2PS0 |
| 4EJ6 | 1LS6 | 3C7Z | 3SI2 | 3HAV | 4ANS | 2HDV | 3NZ0 | 192L | 2XZI |
| 1H6Y | 3MSI | 3U4V | 1RNF | 1FLY | 2ZWU | 2PXX | 3GC7 | 3VSF | 2WEI |
| 1CH1 | 1GE4 | 3VN9 | 1SGW | 2AR0 | 1AKE | 3A7R | 1CVD | 2WEE | 3F95 |
| 1GV8 | 3ERB | 2085 | 1CVA | 3B89 | 2H76 | 1MJS | 1JF8 | 4H24 | 1RH9 |
| 1CEX | 4KEF | 1XNB | 1CIG | 2VWR | 3I7J | 2D0F | 3NCX | 30V0 | 2BPS |
| 1HD0 | 3NPL | 4IIP | 1C66 | 1QQL | 3V8U | 4PAZ | 4IH9 | 2H0K | 1IWD |
| 3NQ8 | 3Q0J | 2FQ3 | 3VHU | 3I1A | 2MEB | 1CVH | 3PD7 | 2R39 | 1VKQ |
| 3ESL | 4AAJ | 1Q4E | 2GGT | 2HKE | 3CE7 | 2VRI | 2I0W | 1C8J | 1CJ7 |
| 2WHH | 4DTY | 1BUD | 3MCS | 2E4L | 3MDZ | 4EPZ | 3CGN | 1T0V | 3ZPP |
| 1L55 | 3T02 | 3N2T | 4DKX | 3HR8 | 3C1X | 2H18 | 3MEM | 2ES7 | 3RLH |
| 3V70 | 3TIH | 4IB4 | 2UCZ | 1LVA | 3QR6 | 3C0L | 2XES | 3B00 | 3TLK |
| 3VHE | 1GFV | 1LOW | 149L | 2DUK | 1WNA | 3P0M | 3AHX | 4DGK | 1CDU |
| 3KIJ | 3DQW | 2C60 | 1P99 | 1FYS | 2Z37 | 1FTN | 3GM8 | 3FJD | 2JAK |
| 3GPG | 4DDU | 2AME | 30N2 | 2GW2 | 1VJZ | 3PGV | 4JER | 1LSG | 2BX6 |
| 3QUF | 4DQK | 2BLN | 3CXU | 3V7N | 1RU4 | 4IC9 | 2Z22 | 3B1Z | 4DZD |
| 2IRU | 1JX6 | 4JGL | 3KQ0 | 4FCA | 1A62 | 3FC7 | 1DKI | 1M0L | 3N7M |
| 3TXA | 30RJ | 1CV7 | 1XAW | 3FTD | 3SLJ | 2VFR | 1YPN | 4JCP | 2B7J |
| 3A5E | 3M4H | 2BZG | 3QHB | 10A4 | 4GQ0 | 2WD0 | 3B40 | 3UMJ | 1QN2 |
| 3AKB | 3TKI | 3M95 | 1LRZ | 1SDI | 4HQF | 3VM5 | 1W3E | 20DL | 4GFI |
| 1ZHM | 1N70 | 3NX0 | 2DYK | 1BK1 | 3DHP | 1Z1N | 3W9A | 1L99 | 1H45 |
| 2YJL | 3VGP | 2PD7 | 3CDV | 2C9C | 1GZJ | 1HFX | 3CJF | 3EUG | 1YX9 |
| 3NY2 | 2B45 | 3F7J | 1K0E | 3I2D | 1CGY | 2CJ7 | 1LFP | 3K7B | 4GER |
| 3V3J | 1UCH | 3BRN | 2DRW | 3DLC | 3GLE | 3PY7 | 1HNN | 1LLP | 3E6Z |
| 4GT6 | 4F01 | 3EXN | 1XA1 | 2Y2X | 1KFD | 1FD2 | 4AS7 | 20VA | 1RCY |
| 4ABN | 4HV4 | 2J7K | 3H8M | 4F00 | 2QIM | 4KAI | 2YV0 | 1LS9 | 2YKH |
| 2NMS | 3VN0 | 1DYC | 4DNS | 1E2V | 201A | 1QI4 | 3HD1 | 3A21 | 2B8E |
| 1EK8 | 3GYP | 1ELK | 3TFG | 2WBX | 1U06 | 3FIA | 1JF2 | 3JUY | 3ZH8 |
| 1YH2 | 4HJC | 1RTP | 2QQU | 2QCP | 2ADM | 1RTZ | 1YKS | 4HJI | 1XC1 |
| 308T | 3UQA | 1L7P | 4H2K | 1EHB | 2XR6 | 4GDN | 1DY5 | 1YAQ | 1S21 |
| 1XR5 | 2B01 | 3VHV | 3GG6 | 2V76 | 3BUV | 1Z8Q | 2P4F | 2R00 | 3US7 |
| 5PAL | 2HUC | 2WDC | 3V3I | 2VU4 | 4EQ8 | 2Z16 | 1TZV | 20EG | 3ZU3 |
| 1C4W | 1ZPU | 2AFY | 1XMJ | 1TIE | 1J11 | 2BSA | 1IR8 | 1N07 | 3P5P |
| 4EPC | 1B59 | 1AF7 | 2QHS | 2NS6 | 3GQ0 | 2HS8 | 1MHQ | 1U9R | 1PT6 |
| 2E8B | 1M48 | 3FEW | 3RSK | 3LYW | 3U2D | 3M70 | 2CM5 | 1U1J | 2ZAY |
| 2HEF | 2P60 | 3FQL | 3QFS | 3ZTF | 1Q74 | 1HD2 | 2GPS | 1MH3 | 1TUX |
| 1J7C | 1AM5 | 2DG9 | 3SJI | 3TGZ | 3JZN | 3E13 | 3C04 | 2A0J | 4FEH |
| 3BMV | 2XST | 3Q5E | 2H79 | 4RXN | 3FJJ | 3P24 | 2H6V | 1UGA | 1BX1 |
| 2YHB | 3FUQ | 2BB0 | 3UMT | 3LF0 | 1R8I | 3FPX | 3R5E | 1CU5 | 1PK3 |
| 2Y09 | 3KWI | 1XCH | 1EP8 | 2J89 | 2AAM | 3MH1 | 4JM1 | 20BD | 1YT4 |

|      |      |      |      |      |      |      |      |      |      |
|------|------|------|------|------|------|------|------|------|------|
| 308Y | 2W9S | 5PTD | 1S0L | 3LI4 | 1EJ0 | 3SKQ | 1V2B | 2CIW | 3ZFC |
| 1ISE | 3W3E | 3PPQ | 3DUE | 1WKA | 1JV6 | 3TA9 | 3DGI | 2X50 | 3LMI |
| 4KM5 | 3BKR | 1Q6D | 1KEB | 1N4W | 1MS5 | 6CGT | 3K0Y | 1NM9 | 4IXG |
| 3MB3 | 4BQB | 1Z0N | 1UH9 | 3FPY | 2QW4 | 3K30 | 3PY9 | 3AG0 | 10G0 |
| 2J4D | 1KWM | 3UN3 | 1L52 | 1H6M | 3PG1 | 30DW | 3A7U | 1VK1 | 2Q3W |
| 1EWF | 1SS9 | 2QY9 | 3IUT | 2RA2 | 4FE9 | 3RLB | 3CTK | 1Z8F | 1XHB |
| 1XEU | 3IK3 | 1RM0 | 1MGY | 3G1N | 3BF8 | 3PPG | 1HJJ | 3RSN | 3ILO |
| 1GYU | 1ZG6 | 2XRU | 1D40 | 1MK0 | 2SN3 | 20YB | 1RDR | 3C65 | 1U0L |
| 1CH2 | 3FYM | 3UP2 | 2PLW | 2ZA9 | 3FS7 | 202X | 2Y0L | 1D1Q | 1KU3 |
| 1YS1 | 3IBT | 3CV9 | 2G6D | 146L | 3BZ5 | 1VYR | 2NXP | 4AXK | 20P6 |
| 1LFG | 2CLD | 1YFQ | 1MBQ | 3EOP | 2VX5 | 20RE | 2XQ0 | 3R4L | 2BEM |
| 3QTM | 3GCE | 3EIG | 1QE3 | 1YAM | 3CMI | 3GS6 | 1GIL | 2F3L | 3APQ |
| 1L01 | 2AGC | 4JMW | 1J48 | 4JND | 2X8F | 2AH5 | 1S2X | 2QY7 | 3MYN |
| 1WC2 | 4DNL | 1CF5 | 3PXH | 201M | 3SP1 | 1I0V | 2VXP | 2B9L | 4GRA |
| 4I9D | 1NL5 | 3KX5 | 3LAX | 1KL7 | 1KGG | 20FR | 1A40 | 2NTE | 3DK7 |
| 4FWZ | 4GI8 | 1LTZ | 1TLA | 1AEP | 3ZY3 | 4IBN | 1VH7 | 2C43 | 2JA4 |
| 3UD6 | 3MR0 | 1ZUR | 1XVL | 3CX2 | 1GMY | 1Q6E | 1CAI | 3EC5 | 3N26 |
| 1DMR | 1QFZ | 2JLR | 1KAA | 2PPN | 3TES | 3N0D | 2HWM | 2QVG | 1XZL |
| 4FYJ | 1IJQ | 4GND | 2IWC | 1TA8 | 3F66 | 2YL9 | 30CJ | 3IPL | 4FYE |
| 1B0L | 2WFP | 3PTW | 2GQX | 1YHH | 3HT0 | 2BGI | 3RJV | 2XFR | 1B2R |
| 4EXZ | 1H44 | 4G54 | 3FTQ | 2X8A | 1EVS | 4ATS | 2W5R | 2E7V | 3F7Q |
| 3PXN | 2BIP | 30N1 | 2WEW | 1CB8 | 1H7C | 1GSX | 3AT7 | 3H10 | 3HAL |
| 1GUU | 1BLI | 2WPW | 2FHP | 2WT0 | 3VZB | 1MNK | 2YV6 | 1FRQ | 3BX8 |
| 1GKK | 2VGQ | 2JHJ | 1R7S | 4ETL | 3QG1 | 1XKR | 20G5 | 1FMX | 1EFD |
| 2CDP | 3QN2 | 1D6A | 2Q0K | 3D0B | 2B3F | 1PML | 1QQK | 2GRV | 3P86 |
| 1H3L | 2FEZ | 2W7Q | 2RKV | 4BBQ | 2PDI | 4KFU | 10TD | 2V0B | 3PVE |
| 3EJN | 3U74 | 3QBN | 1SMI | 221L | 2DY1 | 3F5A | 2IN0 | 2H0M | 1WAR |
| 3C8F | 4BBF | 4K7D | 3AMM | 3P84 | 3MHA | 3T8Y | 8TLN | 1CUG | 2NW0 |
| 2GRY | 3FWX | 4ES8 | 4K0C | 3SQC | 2Q9H | 1LST | 3GBW | 1K0F | 4B2Z |
| 1DX4 | 1B0B | 2APF | 2Y0Y | 1I5N | 4AEF | 1W8Z | 2BIK | 7CCP | 1MKP |
| 1PQ4 | 2XWK | 10IS | 1JQG | 3HIH | 3ILF | 4FXI | 3QI8 | 4BGJ | 2YHC |
| 10GQ | 1IG0 | 2HEJ | 3FF4 | 2IQC | 1S1P | 1KT1 | 2AK3 | 4JHY | 3IBD |
| 3EAC | 200Q | 1Y6W | 1FZQ | 2BQH | 1XPH | 3NKQ | 3BIQ | 2ZD2 | 1ZI9 |
| 4B29 | 3G87 | 1SP3 | 1RU3 | 1TD6 | 3S7R | 1QI5 | 3E0C | 1UX8 | 3NSZ |
| 2I6X | 1STA | 2VTV | 4FD2 | 4BCY | 3LYI | 1B2V | 3MYI | 1Q0G | 4EBY |
| 3LMC | 4EZI | 2Y35 | 3MM1 | 2FUP | 3G66 | 2FCN | 3LP5 | 2NR7 | 2R49 |
| 3GLK | 4JPJ | 3EK9 | 2C4X | 2GHU | 2AEG | 4HDJ | 1S5J | 2F0U | 3EA6 |
| 3MPL | 239L | 3ISG | 3LNU | 3S24 | 2HE7 | 3A10 | 4AUA | 2YPJ | 2ANP |
| 2X2Y | 1F32 | 2WWE | 2HEA | 4FCS | 1NI2 | 2DPM | 1ZI8 | 3LM3 | 2B9R |
| 1MD7 | 2HSI | 4DP1 | 1JXK | 2QK0 | 1DJX | 3CPK | 3VH0 | 3ZUD | 2ZGC |
| 2CDT | 1JDR | 3R2I | 3KN8 | 202G | 3ETV | 4DXZ | 4DZT | 1X0D | 3S69 |
| 4J7M | 2EHS | 3W3U | 4E0W | 3PNZ | 1CH9 | 4IU6 | 2YYS | 2GIQ | 3GIR |
| 2YHA | 2XLY | 1ZYT | 3RLO | 2RF5 | 2I0Y | 1IZ6 | 3LLP | 1CUJ | 3F8K |
| 2AC2 | 1N6R | 2IQX | 3EUN | 2FY7 | 3QH0 | 30TG | 2P9T | 1T1I | 3TT9 |
| 3ACP | 3N3I | 3L9P | 2QV3 | 2EJ1 | 1ZAG | 3LLR | 1KQZ | 4DNP | 2FAU |
| 3SLU | 1ZRH | 1A2Q | 2A0N | 3CFX | 3DTC | 3GIW | 30WC | 1EQ5 | 10G4 |
| 2Q6P | 2RDQ | 2W79 | 1XU8 | 2H1G | 1QS5 | 1QKR | 3NQP | 2Q9J | 2BKE |
| 2W47 | 1P0T | 2ICJ | 3N0G | 3L8Q | 1U0J | 2GHZ | 3QZ1 | 2V6C | 3T50 |
| 2BBS | 3BIA | 1RJQ | 3CF0 | 1TDH | 3EWK | 30HW | 2HFW | 2042 | 2R0C |
| 4GF4 | 2BMM | 3RCG | 3RD5 | 3LD7 | 3MYM | 3V3H | 20Y5 | 1RGP | 1NQC |
| 3MX6 | 1QAD | 1XZI | 2Z0U | 3P2M | 2A2C | 1I6I | 1UKC | 3T7F | 2IA0 |
| 2Q52 | 2PYQ | 3T6M | 2D0W | 1GF6 | 3QFK | 2Z84 | 1U0C | 1H49 | 1R2G |
| 2W5Q | 9AME | 3CKH | 2NSF | 1GYC | 1EA8 | 4IAU | 2EY0 | 1JF4 | 1DW0 |
| 2A8B | 1T1E | 3TVQ | 2X8T | 30EZ | 1U04 | 1SKF | 4FSU | 3EGN | 1SYF |
| 1IZ4 | 3FLV | 1G62 | 3JUC | 3PXD | 1FRD | 1GZ2 | 1L19 | 2CTB | 1JQF |
| 1FK5 | 1H42 | 1T16 | 3000 | 1H8V | 1S8I | 1B6V | 2I0I | 1CCS | 1KB0 |
| 2ZZR | 1KV9 | 2BRY | 2Q5X | 3DZ0 | 1CAZ | 2QS9 | 2Y24 | 30DS | 2WV3 |
| 2R4P | 4DAW | 1T90 | 3B0L | 2DH0 | 1M1S | 1K59 | 1LJ1 | 3MER | 2I44 |
| 4EMD | 2HXS | 1YA9 | 3Q9V | 1CMJ | 2XXD | 4GF2 | 4ANR | 2AYD | 1A87 |
| 3FIF | 3KXW | 3BA0 | 3ESV | 1YA0 | 1BWK | 1UZZ | 108P | 2IWN | 3GA8 |

|      |      |      |      |      |      |      |      |      |      |
|------|------|------|------|------|------|------|------|------|------|
| 2JLQ | 3VXD | 1NUI | 3PYJ | 3D06 | 2Z1J | 3F2G | 107F | 3SWL | 3QCP |
| 30F7 | 3C9H | 1DYB | 1H0J | 3RUZ | 2ZJL | 2EVE | 9PAP | 1Q02 | 3IJC |
| 1PW3 | 4E6I | 2BSC | 3P0H | 3QIO | 3K00 | 1PHK | 1W4S | 4F53 | 4FTF |
| 1XRT | 4AWE | 2PG5 | 3R0N | 1GW6 | 3P9N | 1Z3S | 1NQ9 | 1HDE | 2W7A |
| 2JAD | 20Y7 | 3ZME | 1RWJ | 3CDU | 2GSJ | 4DDD | 2XNC | 3C7A | 2F71 |
| 4HHU | 4FXC | 143L | 2NSQ | 4GXT | 1THM | 3LXI | 3T87 | 1NTP | 10LQ |
| 10SE | 3BJ9 | 1PBK | 3B2F | 2NX2 | 1LUZ | 2JIN | 2QN0 | 1ZAP | 3H8S |
| 1TQ0 | 1VBU | 3IIP | 2X1D | 1KVB | 3PIL | 4A87 | 10LM | 2C8G | 3ZK6 |
| 3TUT | 2ZQ7 | 1D3C | 4HD1 | 3VQT | 3I1E | 3B8C | 3I35 | 4L7M | 2RFA |
| 2CAL | 30Z2 | 1G8I | 4MH8 | 3QUQ | 2QPZ | 224L | 2G10 | 1BIA | 1DAR |
| 4HSE | 1YV7 | 3A54 | 1WB0 | 2JGN | 1J00 | 4G8Z | 1JYH | 1FRB | 4HG2 |
| 3A9B | 1CX4 | 232L | 3P8J | 2DBT | 2WA6 | 1JMW | 2E3N | 1GWU | 2WA0 |
| 3HXL | 2CM0 | 3HOL | 2D0T | 2IPN | 1HK5 | 1YZF | 2VZP | 305E | 1Q0F |
| 1N6N | 1MPB | 2ETB | 3RHA | 2CG7 | 3MP8 | 1P4D | 1U0L | 3HBE | 2ZG1 |
| 3KL3 | 1QVA | 1JG9 | 1K58 | 1CUU | 2PYG | 2CSG | 3BGV | 3MN8 | 1AAZ |
| 4DLH | 4EQL | 1J1F | 2IN8 | 1L9L | 4F2F | 2PCX | 1DRK | 3AME | 4FEF |
| 2ZYR | 1VYK | 2IWR | 3GWI | 2WFI | 2F2X | 4H23 | 4B89 | 1W45 | 1B12 |
| 3R62 | 10G2 | 2P39 | 3E7A | 3EQA | 1D3F | 1A21 | 4HHF | 3EKH | 1NWU |
| 1U2K | 1QGI | 2QQV | 1CPR | 1L31 | 2VG9 | 2W6L | 1CSK | 3LKZ | 3G3L |
| 3EA3 | 2R99 | 1YJF | 3VF4 | 3BER | 1Y4W | 1C44 | 3N7C | 1IXV | 2C9Y |
| 4BN4 | 1GYE | 1HST | 1CFZ | 2C0Q | 3F04 | 2F5U | 1G1V | 2QB1 | 3BDV |
| 1UID | 1EH1 | 3FLA | 3PLW | 1L51 | 1E0K | 3QMX | 3EF0 | 3NJ5 | 1RR0 |
| 1YWM | 3RMS | 2Y9U | 2DCY | 1SCA | 1NZ3 | 3A09 | 1VR5 | 1CUP | 3P8A |
| 3A07 | 1C25 | 3QVV | 3K50 | 10AF | 252L | 4GA2 | 2H73 | 3JU0 | 1AMU |
| 2ZUI | 2H17 | 3OMB | 1R8N | 1HUF | 3VW7 | 3EAF | 3RRW | 4JNJ | 1H4D |
| 2D59 | 3SBD | 3PIC | 2DZV | 2YU1 | 3LJU | 1YXL | 1JMY | 2X7F | 1BOX |
| 2QUP | 4BH5 | 1URV | 3EML | 2JA2 | 1J60 | 3QM0 | 1BB3 | 2NWF | 1MW7 |
| 3MLM | 1VJF | 1HQC | 3I4H | 1FR1 | 1WQ0 | 3EHM | 120L | 1KGX | 2WAB |
| 2YK9 | 3B0P | 1NN6 | 4GVF | 3D7M | 4FMV | 1L17 | 3B3V | 1C4R | 1FC6 |
| 1DTP | 20V3 | 4IB2 | 4ERC | 3BB2 | 2F1T | 1JMS | 1GFR | 1V0M | 3S9U |
| 1HJ9 | 2I9V | 2RCT | 2Z3T | 3SQE | 3KVD | 1GMX | 2YA0 | 2ZR5 | 3RFE |
| 1W10 | 2PBE | 3IG3 | 158L | 2P2Q | 2BSY | 30XH | 2I61 | 3DWT | 3LHS |
| 3EKD | 2WB0 | 2P31 | 1NM8 | 1H98 | 4GUC | 1BEK | 3GMT | 2GWM | 1CZT |
| 3GQX | 3PMF | 3NKU | 1KG7 | 3G9T | 1MUK | 4F69 | 2YLM | 1TT2 | 2RKQ |
| 1XE4 | 3RG4 | 2PK0 | 4D0V | 4F34 | 3DDJ | 1WCH | 1MJ4 | 4AWN | 3Q2B |
| 1ZS9 | 2BJE | 1MZ4 | 4E7E | 3M0E | 3AZS | 2WAC | 3QR1 | 1SF3 | 2IYV |
| 3MM4 | 1SHU | 1IKP | 4EJ4 | 2IP4 | 1EK0 | 1IN4 | 3A00 | 3RCQ | 3TQH |
| 1LYC | 3K54 | 3PMQ | 1IWK | 1MN4 | 1CYG | 4F5S | 3DFG | 2X9Z | 2P0Y |
| 2XKI | 2D4X | 1L93 | 1BSB | 4AJW | 3S26 | 3LG5 | 3I1C | 2G43 | 1J96 |
| 3W5N | 3K2R | 2W5Y | 2YWJ | 2Q40 | 2WA2 | 3LLT | 1MVE | 20HA | 2DPE |
| 2QPU | 4G38 | 3SV9 | 1FTC | 4E7W | 4I1H | 4E00 | 3BZK | 2R4H | 1WXQ |
| 4FB0 | 3GKR | 1YDB | 3USW | 2EY6 | 3TC3 | 1UF9 | 2ZJ9 | 2EYL | 3A1W |
| 3EWA | 3L42 | 3S8R | 3BSG | 3K66 | 3BYV | 1DDG | 3V08 | 1NU0 | 20L7 |
| 3IQC | 1ZKC | 2DX6 | 4J94 | 1B7S | 3FDR | 4ALU | 2FKM | 3ZH9 | 1L16 |
| 3BB4 | 3Q6C | 3T0C | 3VUU | 3REN | 3V0A | 4K44 | 3L4R | 1JXB | 1UAX |
| 1I7P | 1KR3 | 1KAY | 1HEY | 1CNI | 3FL2 | 3NFQ | 1YU8 | 4ARS | 1IUH |
| 3EQ1 | 1D1P | 2QVK | 1YT8 | 2X3N | 2NAP | 1RGZ | 1WD3 | 4EDK | 1CXC |
| 1SQH | 1P5X | 3L00 | 3MFQ | 2F1W | 3C5E | 3VPI | 2F9S | 3T01 | 1Y79 |
| 3SR4 | 1Q1W | 156L | 1RIL | 1T9P | 3P0K | 4KIV | 4JUI | 4DBB | 2YY6 |
| 3A30 | 20XN | 1X9Y | 3D9Y | 1MGR | 4IZ8 | 1T7Q | 3DDL | 2APL | 1TGM |
| 3I0N | 1X3S | 3D3Y | 3D8T | 4ESQ | 1LLA | 2Y3I | 3TLM | 1FFD | 1CV1 |
| 1WUP | 3GDQ | 3AKE | 1XKW | 2AYH | 3TX6 | 1NLI | 1L06 | 3E0R | 1YP7 |
| 4E7G | 2ICU | 2GKE | 2JG4 | 3LRG | 196L | 3C5N | 4H0I | 3MT0 | 1URS |
| 1E25 | 1MNH | 1QCQ | 4IEU | 1KXR | 4IRT | 1Z3H | 1W08 | 3H7R | 3HW0 |
| 1UG3 | 1KU0 | 3FM0 | 2W45 | 1GPC | 1E64 | 3GZ9 | 3022 | 3AQX | 1RM9 |
| 1RB0 | 1RZ2 | 1RGV | 2CZL | 3FEV | 3JS8 | 1X38 | 2IX0 | 1YY3 | 2VP1 |
| 4DCC | 3ID4 | 3QRY | 3NXH | 4IFP | 4BG2 | 4H0S | 3ZNX | 190L | 2V50 |
| 4B6D | 3FNK | 2QTP | 4GPR | 3MGZ | 4DSH | 1EN2 | 1DGS | 2X3U | 3B98 |
| 1S94 | 20JR | 1JTE | 1H6R | 1B80 | 1M4W | 2Y0K | 3RAG | 2PG7 | 1LW9 |
| 3CKF | 1QK2 | 3QKZ | 3B87 | 3I9Y | 3G3T | 1L09 | 1TVY | 2X47 | 10GI |

|      |      |      |      |      |      |      |      |      |      |
|------|------|------|------|------|------|------|------|------|------|
| 1XL7 | 3V97 | 2ZAC | 20PC | 1K5U | 4KEE | 3HVV | 3I99 | 3IQT | 3R6D |
| 3G4G | 2Q0L | 1CDG | 2WXZ | 1U70 | 1HTW | 2BFW | 3BQG | 1F08 | 3P1F |
| 3H57 | 3Q7C | 4EQ5 | 1E5P | 254L | 2N0T | 1LBB | 1VKK | 3QHM | 1EHD |
| 2QZW | 1B7I | 4JXJ | 3NUF | 1NND | 2ZID | 3NEH | 1JI0 | 4A5G | 3TWL |
| 1MN8 | 1R1C | 1S4E | 4GCR | 3U0V | 10T6 | 4EAW | 1I22 | 4HCU | 1RSS |
| 3EH1 | 3Q85 | 1ACF | 2X03 | 2ZBY | 30PU | 1X42 | 1QB0 | 1BSE | 233L |
| 3G5T | 2P0T | 2FDR | 4JG2 | 3HPC | 3PWY | 2W86 | 3RR5 | 2BZD | 2NV0 |
| 1QGV | 2YPD | 1PDA | 3LF9 | 2J1A | 1FY3 | 3KUE | 2QIZ | 1D7P | 4B2I |
| 3P63 | 3JU1 | 2XL4 | 1NTY | 3QE2 | 1E5K | 1L70 | 20PW | 4F9V | 3LV4 |
| 1IUQ | 1IN0 | 3T92 | 3H5Z | 1U7P | 3SY7 | 1Z3Q | 4FML | 3MJE | 1V5D |
| 3BD2 | 2IJ3 | 1GF5 | 1QXY | 1GXY | 2VR9 | 1BY7 | 4A0Q | 1LN4 | 1YD0 |
| 3VF3 | 2PNW | 1J83 | 2079 | 10FC | 3ZIM | 3A7I | 2QU1 | 3P0W | 10KS |
| 1VER | 2C6J | 2PDL | 3TWY | 3NF1 | 3PVG | 1IQ7 | 3VKW | 2EWF | 3EJA |
| 207R | 1ALC | 1SNG | 3S8P | 3PFZ | 3RUX | 1ILZ | 2E24 | 2EX1 | 4DCM |
| 1G0L | 4K4K | 3JVE | 20CK | 2Z13 | 1W9K | 3ELJ | 31BI | 2CND | 2DLI |
| 2IAU | 2Y7B | 1RSY | 3T2Y | 1L84 | 3E7E | 1HEP | 1X2J | 2QSR | 4ARE |
| 3HLG | 1E8X | 2WSN | 3ERW | 1AQJ | 4A4P | 10EW | 2E0J | 4F06 | 1P4X |
| 4ECN | 2HHP | 2G6E | 1B7J | 2CVB | 20S1 | 3U03 | 1BPB | 1JHJ | 3DHU |
| 2I9W | 100H | 3S6M | 2F21 | 2BF6 | 1JNX | 30SR | 3NJU | 2P2E | 1HFP |
| 2QCU | 10PC | 3DB4 | 4G0U | 1U8Z | 3F0Z | 2YXB | 1RBR | 2VGA | 3FE1 |
| 2I7X | 2CIU | 2I9A | 1UA4 | 1BPI | 2VAN | 1WU6 | 10T2 | 2IDV | 3DZH |
| 3DWN | 3USZ | 3QXT | 1IUZ | 1KYP | 1EMY | 1QSB | 1YLT | 248L | 2A2N |
| 4EUG | 3RGK | 2W01 | 3E9U | 2RAA | 2IX0 | 2H19 | 2P18 | 3N94 | 3RC3 |
| 2AWF | 4IZ0 | 3V85 | 2BEN | 3GYK | 2YLH | 4FRU | 1PII | 2HD0 | 1GQV |
| 6PTD | 3PF0 | 2C0H | 1FAA | 1F9I | 1PAM | 2HQ4 | 1V3K | 3RNJ | 1DTJ |
| 2J5Y | 2R88 | 2IYE | 10HU | 3PPW | 2ERX | 2BVF | 1F94 | 1ZDR | 3D9I |
| 2J1Z | 3E5Z | 4ESR | 4HPZ | 3CXM | 1NXC | 4GMO | 4F6F | 3LR1 | 3PM0 |
| 3CQL | 3BLK | 1QFT | 2B1E | 4A41 | 1KXX | 1KNM | 3U5M | 2Q17 | 4DZ5 |
| 3HMR | 3ZD1 | 1LPJ | 1088 | 3CBD | 10LT | 3M4U | 3FRV | 2HZ7 | 106F |
| 4HUA | 2AG9 | 3CNL | 2CIT | 2EBS | 1AG6 | 3DL0 | 2AYV | 3NP8 | 1GW1 |
| 3Q3F | 2A1K | 3LPZ | 4FXT | 3S6V | 1LF6 | 2RHZ | 3M1N | 10TN | 30SQ |
| 1NZJ | 2V05 | 3NCL | 4FEM | 1CR5 | 1ESU | 1YC1 | 1ATS | 2QGO | 2FD4 |
| 1GAK | 3MXP | 1I2G | 1H0P | 2ZBM | 1L24 | 1L87 | 3L6G | 1LE2 | 3RRQ |
| 3BFE | 2EEK | 2WZA | 3REZ | 3LXP | 2Y28 | 1XWV | 3EWH | 4EU0 | 2REI |
| 1S29 | 3HGP | 1GX3 | 3LIU | 3ZUT | 1PJA | 2CVH | 3CVZ | 2YHF | 2DZW |
| 2C77 | 2HVM | 2NVG | 2HL9 | 1HH8 | 2V25 | 1M53 | 2X4L | 3FG8 | 4I7I |
| 1B7Q | 2H74 | 3UE3 | 3059 | 4ERT | 5NLL | 2IFD | 2A6Z | 2J1Q | 4B0A |
| 1MZU | 4AXZ | 1UVX | 1YMA | 3MDQ | 3ZYM | 3T10 | 3B1L | 3C0B | 1GC7 |
| 3RPW | 203E | 3Q7M | 4E55 | 1NE6 | 3T0F | 4ATJ | 3MH9 | 4AXX | 1FR4 |
| 2XU0 | 3L63 | 1BIK | 1BN7 | 2IS7 | 1BNG | 2HRB | 4AF1 | 3QR3 | 3FJE |
| 4AKM | 2ZIC | 3DAI | 3DGS | 4GCN | 2P74 | 3G0V | 3N18 | 3F49 | 3FIQ |
| 4J0W | 1MLS | 3FZ4 | 10NR | 3PZ5 | 2W9Y | 3FJA | 4B0E | 2F0W | 1L94 |
| 10DF | 1LF4 | 1P8L | 1BCX | 3HZ3 | 2A31 | 3S1F | 2JEM | 2SPG | 4EPX |
| 2FG1 | 2YDP | 3TFA | 1NAT | 2LHM | 1WQQ | 1TKE | 1L91 | 3EBM | 3ECQ |
| 1L59 | 3BWY | 4IMO | 2PGE | 2I5L | 2VKQ | 2BXW | 3ZYP | 1LSY | 1H09 |
| 3LW6 | 206W | 3FHH | 2W4F | 2XI0 | 153L | 3R6N | 3F9B | 2CLS | 1US0 |
| 3MA0 | 2J92 | 1NL1 | 1I27 | 2ZEY | 1N9B | 1APA | 1VG8 | 4J2K | 3PFQ |
| 1YUY | 1HXC | 2XRC | 108X | 1B6I | 3S63 | 2FWQ | 1HVF | 4EIP | 1W79 |
| 2004 | 20KW | 1N0R | 3P3G | 2RFJ | 1JT2 | 3EZP | 3M31 | 3TK2 | 1RYL |
| 4HLN | 1KA1 | 1PYY | 3W3V | 3M2M | 2VQ8 | 20CB | 3W04 | 1LZE | 3DSI |
| 2GKT | 1J3F | 2W0D | 4I62 | 1U7L | 3FY4 | 3M1M | 3RC1 | 1FLH | 3FIB |
| 1VI7 | 3IUJ | 3TTM | 4AB4 | 3096 | 3BU9 | 1CU6 | 1L0B | 3CON | 4A2R |
| 3CMD | 3QFU | 2P5K | 3GHM | 1G87 | 1YMN | 3FZE | 3U42 | 1CPN | 2XW9 |
| 30LN | 2HGY | 1WCS | 3AKH | 7MSI | 1GPZ | 3RJ0 | 1L39 | 2WQ8 | 1CSP |
| 1BLP | 1I1J | 4JLX | 1GFY | 20SV | 3EU8 | 3K60 | 4FIW | 1YDN | 3RFJ |
| 2ZAN | 3K7H | 3G7U | 3TS9 | 4KNW | 1EB6 | 4EUL | 2JJ6 | 10J0 | 4F24 |
| 3VZL | 2CJQ | 1S2B | 3LH4 | 1I3I | 2WE6 | 3K5R | 2Z0S | 4KY5 | 1X30 |
| 4GA1 | 2FDV | 3I5V | 3W9Y | 3PMS | 4ANN | 3NIA | 1F4U | 2J63 | 1SSY |
| 1BA7 | 3AQ2 | 1J7X | 30EF | 3MFB | 3D7R | 3PWT | 1RC9 | 1U13 | 1QL9 |
| 2ZKM | 3IGS | 3FDN | 1ESF | 4K92 | 6CCP | 2FFB | 3M0K | 2QDI | 3KC6 |



|      |      |      |      |      |      |      |      |      |      |
|------|------|------|------|------|------|------|------|------|------|
| 1NC5 | 21BI | 3DTB | 2X46 | 2WV9 | 3E8V | 1W41 | 3LI5 | 2WHL | 300X |
| 4I86 | 1TW4 | 3OU2 | 1K9V | 4TNC | 3SEI | 2B5M | 1MW9 | 3KJE | 2QEB |
| 2F0P | 3NUC | 1CBX | 3VTJ | 2HE4 | 4FVA | 3S40 | 3OM6 | 4ABL | 3NI2 |
| 3SIE | 4GL3 | 1RW1 | 3AZ0 | 4GOX | 2I1Y | 109G | 3PB0 | 4FFF | 2VCH |
| 1WL7 | 3DFR | 4GTW | 2NN4 | 3MN0 | 1BR9 | 1IP5 | 2H0L | 3AMC | 1W4T |
| 3U01 | 4G4K | 3R6B | 3CG4 | 1Y93 | 2HB0 | 1Q4A | 3TYW | 3U99 | 4AQG |
| 1Z93 | 1CB0 | 3OPR | 3UFZ | 4K6N | 1AIM | 2IDU | 1H3Q | 1M9U | 1DB0 |
| 3Q2P | 3PNV | 2NVH | 3IHS | 1PIE | 1BCW | 3C3X | 1B2J | 3F0T | 4H7M |
| 4IS8 | 3F61 | 1GH2 | 4FB7 | 4DUB | 3CX3 | 3C8Q | 2ID7 | 1Q0S | 2Y3C |
| 2AAK | 3EWL | 1QT4 | 1S8N | 1W0P | 1I00 | 3U9H | 2R0I | 2FE5 | 2P5D |
| 1GFT | 1VCL | 2CZT | 1DD9 | 1DLS | 1VFE | 2D0S | 2JKP | 1KVA | 2JJR |
| 4H6X | 2G7R | 1SY1 | 1XMK | 3Q7Z | 3BJH | 2ZR4 | 2X1B | 4E1T | 3SQX |
| 1DLC | 2C8J | 3L29 | 2VBU | 3F7W | 3NEA | 4NUL | 1RLM | 4F05 | 4FHG |
| 2YQZ | 10CS | 3C4A | 1U32 | 2JC1 | 2QP9 | 2CCQ | 3JWI | 216L | 1QQ0 |
| 1IUE | 1DFA | 3T3K | 2OAY | 303X | 3P6D | 2HTS | 2J00 | 2I2S | 10WE |
| 2QZB | 2GH9 | 1A58 | 2EA9 | 2AUJ | 1CAM | 2UZR | 1GNT | 3NOK | 2OYR |
| 3VN5 | 2E09 | 2W1I | 1MH0 | 3EVQ | 3DVB | 1EX3 | 1IP6 | 2PWA | 1KJW |
| 191L | 2DRS | 1HVX | 2X3M | 3BOV | 4B6C | 10UD | 3TPB | 1YPC | 1MGN |
| 2JGU | 3DWB | 3RSC | 3M4X | 4G0X | 2PB1 | 3SMV | 3RCW | 1US3 | 3GKJ |
| 3LD1 | 2N00 | 4DR8 | 1EY9 | 3BWM | 3RE1 | 2HP7 | 3S79 | 3H5J | 1GS0 |
| 3PX8 | 2VSQ | 4GCO | 2SLI | 1JY1 | 2ACU | 3H9C | 2ICA | 2QLT | 1C8Z |
| 4EN1 | 3C4S | 1GUV | 3BPB | 3FQ2 | 4FBC | 3EQN | 3K6J | 1R1Z | 1YNV |
| 1WAC | 1SBP | 2HWK | 2DUH | 4NLL | 2QHT | 3ETY | 4AX8 | 2P0F | 4L2M |
| 3VPY | 4L09 | 1L8J | 1KWI | 3GLD | 1QMP | 2G7B | 3P82 | 2YJ6 | 1L65 |
| 1CUQ | 1A8H | 1DTG | 1BA0 | 1HRM | 3GBE | 3CWV | 3ZH5 | 2G5X | 1BAV |
| 197L | 1TKJ | 3LNF | 2ID1 | 2JEX | 3VUV | 3AXC | 1WS6 | 1KS9 | 3W4Q |
| 2Y7N | 1FSU | 3UJC | 3IKJ | 2I6Q | 10P2 | 1Q0R | 3SK0 | 2QN4 | 3RC7 |
| 1XOV | 2BBZ | 3CSQ | 1Vfy | 3BYN | 1A6M | 4AP3 | 4HGH | 3ZXS | 3S0A |
| 3UQ9 | 3K6R | 3G06 | 4AK0 | 2NVF | 3QRA | 1ACC | 1DUR | 30W8 | 2R3A |
| 3TEU | 3MEH | 1MB1 | 1QYQ | 2PFZ | 3CFW | 1BI0 | 3MWX | 1P9R | 2GPW |
| 20C6 | 3N1D | 1P2L | 3DG9 | 1KCL | 3V0I | 2I62 | 3UXF | 3NA7 | 2QIK |
| 1TQH | 1HP1 | 2AEW | 3EG0 | 2ZXC | 1DLY | 2B4W | 2G7N | 2QJX | 1PMI |
| 1NZD | 4GAX | 1NXB | 3GU8 | 2CBR | 2WG1 | 2HKJ | 10G3 | 2Q4Q | 2GF9 |
| 4ARV | 3UE2 | 1VBL | 3VZM | 1C86 | 4IIL | 2FCT | 2P2B | 4H6V | 2IQI |
| 1PEZ | 4JDU | 3QQM | 3HR9 | 2AJ6 | 2C9E | 1P14 | 3B9U | 1AKW | 2P0E |
| 1EKL | 1YQS | 1Z04 | 2Q6U | 2VWA | 4JB3 | 4F3N | 2IY9 | 2CB9 | 3G5J |
| 2QDM | 1FNN | 10H3 | 1DYD | 1Z5R | 3QIJ | 305V | 4GZC | 3KVN | 1L96 |
| 1CJL | 1L73 | 1JJ7 | 3K9L | 2GAE | 4F6L | 2XAU | 3CG3 | 3AMG | 2X9Q |
| 3BBA | 2ACF | 2GIZ | 2ZTG | 3ED3 | 3ERQ | 3A3R | 2ASC | 3US4 | 4IKD |
| 1073 | 1CYC | 1S69 | 3MSZ | 4I2S | 2E8G | 4GA7 | 2I4G | 1ULV | 1TH9 |
| 2ORX | 3RJY | 3NKY | 1IAV | 7RNT | 1W18 | 1VDZ | 4EJN | 4DF3 | 2GZB |
| 2R8A | 1GS4 | 4DIA | 3HI9 | 3NSJ | 2PY7 | 1UNS | 3TQ8 | 1BC0 | 4E5G |
| 2QRT | 3U26 | 207I | 1YPA | 2IYA | 1YZT | 1L0K | 1ESP | 1YJ2 | 2VY6 |
| 3F1Z | 1HFU | 2G7E | 3HZT | 1IXH | 2V6G | 4HP9 | 2F0I | 1RF6 | 1WAM |
| 2GU1 | 3D0N | 1ZBP | 206I | 1WDY | 3U0J | 3MW2 | 2EIO | 4G29 | 4HBK |
| 1MQV | 4BQY | 2W39 | 2EVT | 3BA5 | 2PY0 | 3UY8 | 2MHR | 1RNI | 3D8G |
| 3A0V | 3UIU | 1H4X | 3BYJ | 2FNQ | 2DB0 | 3RJP | 4I3C | 3N70 | 3QPI |
| 2071 | 2DCK | 1GSK | 1CVF | 3TTQ | 3MVN | 4ELC | 1UMI | 3TFM | 1XXL |
| 2IVX | 3HQP | 3NXW | 3EAD | 2D4Y | 1LPY | 3BH0 | 3TTC | 3BK5 | 3E4G |
| 3VX6 | 3NYI | 2QUG | 4DKR | 1MVY | 1UKS | 1ITW | 3N4V | 1HBQ | 3SZV |
| 2NQ5 | 206R | 3HUI | 3H31 | 2BVY | 1DQ3 | 2F2V | 4GAC | 4B8J | 3R1P |
| 1SRV | 3V9F | 3V0T | 2CFE | 2BJV | 2ZP4 | 2XJA | 2CWN | 3V0J | 3JSZ |
| 1SQT | 1HDK | 4IGD | 2EVK | 3PTJ | 1Y6I | 3A05 | 2A0B | 3KHK | 3BAQ |
| 1K07 | 3OIZ | 1HNL | 3BAX | 169L | 3T58 | 2V3K | 3H96 | 1G4I | 2CM4 |
| 2YXL | 1Z3Y | 2EVA | 2C53 | 3G9X | 3BWD | 1B13 | 1KAX | 1FJR | 4F0V |
| 2WXX | 3RI9 | 4H1X | 3TR1 | 2FFQ | 3IEZ | 4HP4 | 1WU4 | 4FEU | 2MEE |
| 3PPX | 2AWJ | 1Y07 | 3PHS | 10M0 | 2REM | 1L10 | 1NPU | 1EXR | 2FS0 |
| 3KCI | 2GNX | 1I0A | 1DUE | 1VK4 | 4GYJ | 2WNK | 1CE2 | 4IKY | 2BQ4 |
| 2HSG | 3U3I | 3ZDJ | 3QB3 | 1CVK | 1M1H | 1L44 | 1AHC | 3K45 | 2F6H |
| 1CX7 | 1V9I | 3UOR | 2XGV | 3ZUC | 2GAR | 2ZPT | 4HL0 | 1RZU | 1GC5 |

|      |      |      |      |      |      |      |      |      |      |
|------|------|------|------|------|------|------|------|------|------|
| 1Q8C | 4FH3 | 3DC0 | 3HG0 | 2R0B | 1N05 | 2G5F | 2G8S | 3VRN | 3IXL |
| 3DYR | 4G8B | 1QS1 | 4E5V | 1LYQ | 1CC8 | 2CCM | 1RCF | 300P | 103X |
| 1JB3 | 4DLP | 2FA9 | 1JWF | 2IJA | 1GG4 | 4BCX | 1DYA | 3DJ3 | 2WZF |
| 2GEK | 2R9I | 1AK9 | 3P1G | 1WKB | 30AJ | 8ACN | 3RJ2 | 1YTL | 2QGM |
| 3GUX | 4L8A | 2ZBA | 1MF7 | 4HBU | 3GZG | 3LCY | 4KY3 | 2FEA | 2H6X |
| 4J88 | 1JLN | 4E9B | 2W5U | 1ZUH | 10QV | 1I8A | 3A4C | 1CQA | 4H59 |
| 4GAB | 1BLF | 10UA | 2JIK | 2YCX | 1P7J | 3TQM | 1FCK | 2GZX | 3EFC |
| 1I5Q | 2WKQ | 3D1J | 1JFB | 2CXH | 3TAH | 4GC0 | 1DLR | 4H79 | 30JB |
| 1FLQ | 2QB7 | 3IU5 | 3NHI | 3VM8 | 1BKR | 4GMR | 3LL0 | 308V | 2XVS |
| 2VCA | 3HZJ | 2P0D | 3DP5 | 3QE5 | 1PDU | 4FD9 | 3AWE | 3KKQ | 2POM |
| 3SVJ | 2GTQ | 1YLP | 1DZ4 | 2BIW | 2NT0 | 3GA2 | 2PST | 1IU4 | 3V7Q |
| 4DD8 | 3IED | 4ESP | 4BCE | 3ZKW | 2YV7 | 171L | 3UJ4 | 4FMU | 1U9P |
| 3SWR | 3SDU | 1L29 | 3A2E | 1IQZ | 1BT3 | 1P5S | 3FE2 | 3R5Y | 3RYM |
| 1ZR3 | 3CV3 | 4I5T | 3VSN | 1MJC | 2WAZ | 3TIG | 2FJM | 2PBN | 2WIB |
| 1QUG | 1NDU | 1RL6 | 20IL | 1LRV | 1HED | 2RFW | 3VV5 | 1P5D | 3RQ0 |
| 4EVF | 2C1I | 3P26 | 2PI6 | 2CDV | 4E30 | 1ZAR | 3PV7 | 3MJT | 3V3T |
| 3DAD | 3CRG | 3VEZ | 1SPJ | 3KNE | 1SM2 | 4E01 | 1YIQ | 3NH6 | 3SY1 |
| 4I0N | 2DZU | 2GDM | 3HJT | 2PNE | 3LX0 | 3S94 | 3A3J | 3BVZ | 4A6Q |
| 211L | 1YMW | 1L80 | 3I6Y | 2ZKG | 1MRQ | 2H75 | 1MDB | 3KF0 | 20GT |
| 3TGT | 3LIM | 4DB9 | 2JL9 | 2G5D | 4J0D | 2JHK | 1UR1 | 3GEC | 307Q |
| 2GMF | 2P3K | 2VYW | 3GYI | 3G5B | 4EKJ | 3LOG | 4B9X | 3BWZ | 2VI6 |
| 1R6V | 3G0Q | 1HPI | 1CY0 | 3PF2 | 3U0P | 1TU9 | 3VTW | 4KV6 | 2WQB |
| 4FD7 | 3PKD | 1X3L | 4FNW | 3KZ7 | 3FJ9 | 3C0P | 2V5T | 3SUF | 4AN0 |
| 2ANL | 4F09 | 3BW7 | 1V2N | 3QR0 | 1I1Z | 1XA6 | 3EJG | 3CHY | 3PFY |
| 1YCD | 4GVP | 3IAN | 3HUN | 4DUF | 1L23 | 106Y | 1XIP | 3KT2 | 3SXH |
| 1JDL | 30PE | 1WS0 | 2NSP | 2034 | 3MPX | 4DWN | 3SU1 | 1JGI | 1BU2 |
| 1HAY | 4E31 | 4F7H | 2CUL | 2AU1 | 1YUE | 20FK | 1IR9 | 4I59 | 1XS5 |
| 4HE6 | 3CW8 | 1SL7 | 30C9 | 3A0U | 3B0N | 2ICI | 3K2P | 2V7K | 1T5I |
| 3NZU | 4HLT | 3DVC | 3NPW | 4HAS | 3S9V | 1RH1 | 3SC6 | 4EDL | 2AX6 |
| 4HZS | 1AYE | 2YMV | 2NVE | 2WZE | 2C6F | 1C75 | 2IFV | 2BGS | 2QQR |
| 3P1U | 3KEW | 1CXY | 20X9 | 1HZ0 | 3KP9 | 2BIB | 3B0Y | 1ECE | 4I4D |
| 2GML | 1WSJ | 3UH8 | 1A0E | 1QY3 | 1S3I | 2YMU | 3V55 | 209S | 4EPQ |
| 4GMV | 1XM6 | 4HJZ | 2FST | 3U07 | 3H06 | 2GPI | 1MZ5 | 1WKY | 3CP5 |
| 1A3Z | 4AV0 | 2VS6 | 4MSI | 2NUM | 4ES7 | 2BQL | 10IT | 2HBG | 2WM3 |
| 4H6I | 1C1K | 1ERJ | 3A5I | 1ES4 | 451C | 1K2A | 4HNI | 3UMH | 4HET |
| 1SUE | 3R5Z | 2F0S | 1NY1 | 1EY5 | 3TI7 | 3HX4 | 2BWF | 4FBN | 3TKT |
| 4JSZ | 3HN5 | 3UJ1 | 1L74 | 1UX6 | 1RL9 | 3FI2 | 1SSW | 2R7D | 2XN4 |
| 3TVA | 1VLM | 4DF7 | 3B34 | 3TMG | 3CZG | 4DPB | 2ATB | 4DXB | 3VNG |
| 1E21 | 3PZT | 3SZU | 4JW0 | 3V5U | 2J5W | 3KLU | 3VLA | 1LML | 1C7J |
| 2H2T | 4EX6 | 3DML | 4HTS | 1J0M | 1GGL | 1YI0 | 3IU0 | 3BND | 1U0Q |
| 4J3K | 2BMV | 1H4U | 3G39 | 2PJJ | 1M40 | 1F25 | 226L | 2PAG | 308M |
| 2II0 | 1XWW | 1G0B | 1A44 | 1AKQ | 4KD4 | 2WZD | 1JBE | 1JCL | 1Y01 |
| 3ZUQ | 2BDV | 1CID | 108L | 3RBJ | 1ABE | 3KEY | 3W50 | 4KIL | 4F60 |
| 3PFS | 2W3Y | 4A4J | 1B70 | 3S0K | 10U0 | 2YJS | 3QY4 | 2A98 | 3H08 |
| 3DCD | 3G7C | 2RJ0 | 2WC0 | 3NHH | 1WKC | 4FUT | 1WJX | 1DCB | 3S4M |
| 3CLM | 1UWV | 4AZF | 3RPD | 1W2D | 1HDH | 3DRU | 1Z3D | 1L58 | 3HZ8 |
| 3RZ3 | 4E94 | 3MN2 | 4GQR | 3A0K | 1B8S | 1U4G | 2FRX | 3L2X | 2XYK |
| 2YH5 | 2ALF | 3LFJ | 3JXF | 2PPP | 4JHS | 4EYZ | 3ZYK | 4AI4 | 3G91 |
| 4FBR | 1J16 | 2JD4 | 2EU9 | 3CN9 | 10YG | 1NK0 | 2Y0Q | 3ZHN | 1Y8C |
| 3I33 | 2INW | 1INP | 4DZG | 2PQ6 | 1TCY | 1WN7 | 2VEK | 1V3Y | 20U2 |
| 3C4F | 1WG8 | 3QQI | 2JK7 | 3DNU | 2GGD | 1UHN | 2G9D | 3N91 | 2XR5 |
| 3IC5 | 3E0Z | 3A8Q | 1SN7 | 3L0S | 4EF1 | 2G4K | 1AYZ | 1W0S | 3RLK |
| 3S95 | 3F45 | 1GRW | 3P0Z | 3MYZ | 1KG6 | 3FLN | 3Q5M | 4IJB | 1DCM |
| 2X1I | 1ZHR | 20DU | 1F9V | 100W | 1KA0 | 1BLU | 3GBJ | 4AR7 | 3VQF |
| 3W24 | 1RE8 | 1P37 | 1CGE | 3QD2 | 3LG4 | 1U17 | 3T0Q | 3NY4 | 2QBM |
| 3QC4 | 2WNP | 3D0N | 1NG5 | 4EPL | 3AZC | 3U7C | 1RY6 | 2FQX | 1Z1Q |
| 3F7N | 2V2K | 1KN3 | 1A6L | 20KC | 2QFZ | 1EP7 | 1X60 | 10AP | 3FT9 |
| 3E9T | 1H7I | 3L5I | 2HW4 | 3NBI | 10UC | 1LYE | 3FES | 2FVY | 1FDD |
| 1ROS | 2QI8 | 304S | 1MJ5 | 1MZR | 10VB | 3ZBQ | 10WQ | 4ACO | 3PQS |
| 4AME | 20C3 | 2BNJ | 2EG3 | 1BJK | 3T0G | 1KBK | 1YLJ | 1YYH | 2YDV |

|      |      |      |      |      |      |      |      |      |      |
|------|------|------|------|------|------|------|------|------|------|
| 3PPV | 3E05 | 3L78 | 3K0M | 1YN4 | 1LL6 | 1KH0 | 1TUC | 1RK6 | 1M8U |
| 1PPN | 30BY | 3FT0 | 3L4H | 3R6U | 3PSX | 2IAR | 1PVX | 4JKU | 1DIW |
| 2WW8 | 1M9Z | 2PN5 | 3Q27 | 3TIP | 3VW5 | 4K5V | 3PWZ | 3CZL | 3F1W |
| 1IIC | 4FHD | 2ERY | 3ADF | 1JFU | 2H70 | 3TP5 | 3FBY | 3DSG | 2PMA |
| 3AW5 | 10EJ | 3H8J | 2Z1I | 3CM0 | 1Q6X | 3HLR | 1JL7 | 1ZGK | 4GB7 |
| 3MPP | 1F0L | 3HPR | 3MAX | 1LJL | 308N | 2YGF | 2XFA | 1Y9U | 4AFA |
| 20FJ | 2QYW | 1BPT | 1NB8 | 2H70 | 4APL | 1ZMA | 4IH4 | 3PJC | 1GNU |
| 1P7I | 2G0U | 1AQZ | 1C08 | 3P1H | 1ISP | 3F9M | 1FNL | 3CGX | 2R24 |
| 4H5I | 1NP1 | 1Q2B | 1QNX | 1L98 | 20H8 | 2GKP | 4ENF | 4IRM | 3QZQ |
| 30UV | 2QWL | 3RJU | 3TEK | 1IQ4 | 1CHZ | 3LPA | 2IXM | 1V2L | 3BKP |
| 3NF5 | 2FA4 | 1I06 | 1KK3 | 2BT2 | 1TG3 | 3M12 | 3PR9 | 4KZK | 4IQY |
| 2JN3 | 3T80 | 3F0L | 3AU5 | 4GES | 1BYB | 1JTC | 3L07 | 4HBD | 2JFR |
| 2J13 | 2IWI | 3R9M | 3T3J | 3KLJ | 3PES | 4J8A | 20Y3 | 2J4R | 1CIU |
| 3EZI | 3KNV | 1LJY | 2XEH | 1LOV | 2V2Z | 3I10 | 1HJL | 2VLU | 4ARX |
| 1IJ5 | 3ZC4 | 1IY2 | 3NE0 | 1FX1 | 3SWV | 2A91 | 1XRL | 20JQ | 4IKV |
| 1ZDY | 1MDC | 1M03 | 3UGK | 1YW2 | 3GG3 | 1SUB | 1FZY | 1BZC | 2YL8 |
| 1XND | 4G3C | 3SD7 | 20V0 | 1Z0M | 3LXQ | 2V0S | 4B1M | 1U9K | 3B8Y |
| 2VE8 | 3BHK | 2YLN | 2X25 | 1P4P | 2Z83 | 4HCI | 3BVS | 3LAF | 1H12 |
| 2X10 | 3BYD | 1PXZ | 3GEQ | 3GNF | 3HL8 | 4D0E | 2I0K | 1JRX | 3M8U |
| 1F26 | 1Y6L | 2FRZ | 4BJU | 2J90 | 3AKA | 3C7W | 1QZ3 | 1IWM | 1N7Q |
| 1WR5 | 3U7B | 2QZP | 1H5Z | 3AJZ | 1BJ7 | 1ZTH | 1IXZ | 3EBE | 2JII |
| 2FFY | 2ZC7 | 4CCP | 3TSS | 3QWP | 4A0E | 3G8D | 1YM7 | 2WNG | 2F26 |
| 3ZLI | 1D5R | 1JBW | 2V0W | 3RVQ | 1GNS | 1CU0 | 3ND2 | 2GA8 | 3PVK |
| 3BAV | 1CKL | 20IV | 2P26 | 2YXF | 1PC3 | 4B99 | 3V6P | 2B4Z | 3NHZ |
| 2DDF | 4AWT | 1HNF | 2JQC | 3ATS | 3N98 | 1HCV | 4AUT | 1CPT | 3EY5 |
| 2P17 | 4ANL | 3BRY | 3EAE | 2QFD | 30SY | 2BQG | 2J0J | 3P1A | 1EQ6 |
| 10SS | 2BRF | 3FE4 | 2055 | 3KFA | 2H1B | 2XC3 | 12CA | 2XD7 | 1CJ8 |
| 3QUT | 1DVO | 161L | 1H4P | 2EY5 | 2FK8 | 1V9M | 2P2F | 3EMC | 4HAA |
| 3DKM | 1DYP | 1QVS | 1YHT | 3AJ7 | 3KFL | 2Z66 | 1A39 | 1JX1 | 1RP1 |
| 2Q3G | 1LYI | 2CMT | 4FLE | 3TBD | 1GY1 | 1FRX | 1IZ2 | 30H3 | 3P0L |
| 3BB3 | 3C1A | 3LEP | 1ZH9 | 3KJT | 3EJ5 | 2ANY | 1VHH | 1KI0 | 1PY0 |
| 1V10 | 3AIH | 3KK0 | 1BWZ | 3H4G | 3FS0 | 1AKY | 3QWL | 3KTZ | 4F21 |
| 4D8N | 4DVI | 3R0F | 1I20 | 2CKE | 3S9X | 2UUS | 3NJE | 2GV0 | 2NRJ |
| 1TIF | 1C3D | 2ZE7 | 2BQB | 10YW | 4FD0 | 2VM5 | 2WM0 | 1GCA | 1P0H |
| 1L68 | 3P1W | 4KKU | 3W52 | 1CZR | 1KW7 | 3IEG | 3B0E | 2B29 | 3HWJ |
| 3H4Q | 305Q | 2W3T | 3AQ3 | 2GW5 | 1I9Z | 2X27 | 3BIS | 3E90 | 4ELG |
| 20SB | 1Z67 | 3TDW | 3VG0 | 1FNM | 4GXW | 3G4I | 1K6A | 1ZX6 | 4HZH |
| 3FVY | 2HYV | 2E3H | 3SNX | 2FCF | 1UM8 | 1QJP | 1SQM | 2GC5 | 2R0V |
| 3LUA | 3SD4 | 2CYG | 2YZV | 3SBG | 2QVB | 3TG8 | 3JUG | 2GP0 | 4A5T |
| 237L | 1FGQ | 1FAN | 1GP6 | 3M23 | 4A6Z | 3MUI | 2YB6 | 3EJI | 3QM9 |
| 3S6B | 1IXI | 2Q4W | 2Z2I | 3LAH | 1VS0 | 1S0U | 1NAZ | 2XY1 | 1L15 |
| 3L0B | 3EP0 | 2ZFY | 2WA5 | 1WDR | 1BA1 | 1SNO | 2JHS | 2I4S | 1LL7 |
| 3JSR | 3PAF | 4AZZ | 3ZSU | 20XP | 1ETJ | 3A1B | 1LFI | 2R51 | 1YJB |
| 2J4B | 3AV3 | 3U9W | 1E63 | 1GA8 | 2SNM | 3KAD | 3P1X | 10Z2 | 1JCI |
| 1KCT | 1P00 | 1P09 | 1QUF | 1DVM | 3T7Z | 4A2V | 2P65 | 3CVM | 3SIJ |
| 3H2H | 3T05 | 3V2W | 1J97 | 2Y9R | 3D2N | 3HD0 | 1LKX | 4HQA | 3NQV |
| 1ZLM | 3A1A | 1NA0 | 2NNB | 4E90 | 3UDD | 1LG2 | 1TXJ | 1ZU0 | 3D4G |
| 10ZL | 1WNX | 3HSU | 3U5L | 3EG3 | 1J87 | 1IAL | 3B5Q | 4GXP | 1QNR |
| 1U71 | 4KE4 | 1FNI | 4H27 | 2BCE | 10SH | 1RRV | 2WTW | 2C71 | 1LII |
| 3Q48 | 2QZ2 | 3HJZ | 3PE9 | 1SDW | 1FMK | 3KD8 | 4F3S | 200J | 238L |
| 1ANN | 4ADY | 1KMQ | 3EIE | 2DDX | 4DVZ | 4J8P | 1CKC | 3ZS5 | 3W3T |
| 1SZ9 | 1PE9 | 20S0 | 4DI9 | 3D5Z | 20DJ | 1WDN | 1SY3 | 1MFW | 1VCC |
| 2HY7 | 1WY6 | 3V33 | 1T77 | 1YAN | 3KHW | 3BCZ | 4GSJ | 3DCN | 1KY1 |
| 3IDV | 1KM0 | 30G5 | 3Q0K | 3QD9 | 2FYE | 2VFK | 1T1G | 3E5M | 30I0 |
| 2BQ0 | 1C92 | 1CPG | 1M8N | 1PSN | 3GKK | 2BVU | 1G0L | 1MIL | 3VC1 |
| 4G3T | 1V4Y | 2ALR | 1Z81 | 2A39 | 2IGD | 1BNF | 2Q9V | 3F0P | 3BHW |
| 4I1Z | 2WB0 | 1A8P | 3APS | 3D21 | 3AY2 | 5CA2 | 3B0N | 4FWI | 2NTH |
| 2IA7 | 3S4L | 2GBM | 3QYA | 1W3H | 3A50 | 2VUP | 2W23 | 3QZU | 4BKW |
| 30WR | 4JGB | 1BRK | 2B9E | 2P1G | 4IL3 | 2Y60 | 3MHD | 1FE5 | 3MC1 |
| 2FZ4 | 3Q6X | 3JZT | 1UTM | 3BS7 | 1R5L | 3S5M | 1B0Q | 4EIS | 140L |

|      |      |      |      |      |      |      |      |      |      |
|------|------|------|------|------|------|------|------|------|------|
| 3AAG | 3SA0 | 2HI0 | 2G00 | 1QUB | 3PAG | 1M8Z | 4FCZ | 3BDC | 3ZH4 |
| 3UW2 | 2TSS | 1XKT | 101Z | 3IN0 | 3G6S | 3HZX | 1Q4C | 3GA3 | 4F4M |
| 4H09 | 2QEQ | 3F0G | 30PX | 1N7P | 2F46 | 3AUM | 1ERM | 4ILJ | 1TSF |
| 3C81 | 1L32 | 2Q4F | 1AQL | 1VAV | 2FBY | 6CP4 | 3EVF | 3HBZ | 2VMH |
| 1F20 | 3NXE | 3RPT | 30UI | 2X6R | 3P8W | 4D00 | 2IM9 | 2E56 | 4HS5 |
| 3R8D | 1QSW | 3LFF | 3MFC | 2QET | 1JTI | 1YPY | 3PPH | 4DND | 1YHG |
| 1QDD | 2YEQ | 1HFC | 2I47 | 1KDA | 1CHD | 2V9K | 4JID | 3D3Q | 3HBN |
| 4E6Z | 3ZVV | 2PNU | 3NNB | 4HBR | 1GX0 | 4E2B | 4KQZ | 3F06 | 2IN3 |
| 4DV8 | 1B9A | 3S6W | 3ZCW | 3N0L | 1BZ4 | 3PSF | 1KVC | 4AIE | 1QY0 |
| 3DE0 | 3PEB | 2WE2 | 3NIS | 1J8Q | 1AQB | 3A1U | 2J1V | 1KR0 | 1RJB |
| 1RDA | 1L37 | 1W8K | 2PJD | 1DYE | 1YHV | 3HGL | 1GLN | 4EFG | 1N44 |
| 3S2J | 1K40 | 4K61 | 2V1Z | 4I6I | 1A0A | 3OY0 | 4FDC | 3ZPY | 30Q4 |
| 2ERV | 3B2M | 3SBS | 1W8A | 1AM0 | 3AWP | 30F1 | 7ACN | 2GCL | 2P6W |
| 1ZWP | 3LJW | 2PR7 | 1L0Q | 30LX | 1QIB | 1X6L | 2H5U | 4G7W | 2QT1 |
| 1ZC0 | 1XAK | 1P15 | 3DXY | 2IMQ | 1W8J | 1GB6 | 4JCC | 2B3Y | 4E9E |
| 1FQI | 4AIW | 3B7N | 2GT1 | 1N06 | 1GPL | 4FXV | 2IAT | 1GEN | 2V9R |
| 303U | 4G57 | 3D6J | 3U45 | 2AWL | 4BGQ | 3VKI | 3E73 | 3CMP | 3PPY |
| 1ID2 | 3ZD9 | 1L82 | 4BI4 | 3FAJ | 3HNG | 3VKN | 1XQ0 | 1AF3 | 3ST0 |
| 2ZFI | 1R2I | 2ESA | 2HBJ | 2QRI | 2A3U | 2PZ1 | 2ZV7 | 2090 | 2XXZ |
| 1IR6 | 3Q0Y | 1AH7 | 3AB5 | 2JGP | 1DSL | 3DH0 | 1RHS | 306U | 1VPR |
| 3PL5 | 3C8Z | 3ZB0 | 3NVS | 3C0X | 3LHA | 1SVS | 1G9X | 4DRZ | 2JBV |
| 1B1J | 4ATW | 2JKW | 1IG5 | 1S0G | 2PI3 | 3IBY | 3PDV | 3LH0 | 1U6M |
| 3A45 | 2D3I | 1N1T | 1JHN | 4AW5 | 3SH4 | 2R65 | 3BVG | 3FFZ | 1LCT |
| 4DRV | 3ZUS | 1CTJ | 1D9X | 3PLY | 2SNS | 2BJW | 1DXJ | 1YU7 | 3AXI |
| 3RMY | 2W2I | 1B5U | 3EKJ | 3UC9 | 1TQG | 3RLD | 2X9X | 1R9L | 2V75 |
| 1DBP | 1L95 | 3H0J | 4GS5 | 3M7V | 3N3C | 1NPH | 2IY7 | 4FEK | 3VVJ |
| 1G66 | 1ZE1 | 1UN3 | 3IDP | 2V1L | 2APT | 4I8I | 3RJ0 | 4GNM | 2EI9 |
| 2WQ9 | 1JM1 | 4HLX | 4EEJ | 3U90 | 4HGT | 2IEW | 2QC5 | 2NN5 | 4H1Q |
| 3HRA | 2XJU | 1T5L | 10FF | 30D6 | 3B6X | 3AML | 3KWL | 1HXN | 2X30 |
| 242L | 3V00 | 1YN5 | 1IZJ | 1D0B | 2FH7 | 2IC9 | 3UMF | 1IS1 | 2F1X |
| 2Q4C | 1IST | 3MTY | 2X55 | 2ZRM | 1EZ6 | 3UR6 | 3IA4 | 2EWE | 3VDH |
| 1I9E | 4IG1 | 3RMQ | 4F9D | 2AF5 | 2Q83 | 4AYJ | 1VZ2 | 3DA0 | 3IGN |
| 1CMN | 1LJU | 3H0P | 3BGI | 3L4E | 1G61 | 3U50 | 3H00 | 10I8 | 2YT4 |
| 1B20 | 4B4R | 1J9M | 2W1S | 1QUL | 3N71 | 4DE9 | 1V2R | 2NQY | 4AFK |
| 3ZZ0 | 1IEJ | 4GX8 | 162L | 1VZT | 10HT | 2CKX | 1MSJ | 1UN2 | 3UHP |
| 1KMT | 2H3W | 1TL2 | 1E43 | 1L0J | 2GRC | 3GSE | 2JLL | 4H0W | 152L |
| 3RGQ | 3M7R | 1J2L | 2J0I | 2X12 | 3PDT | 1VYV | 3QDP | 2Z8G | 3H4C |
| 1GGV | 2Z1G | 1BQB | 2B43 | 2GFT | 1T3Y | 3HSG | 1HMT | 2NS0 | 3H63 |
| 3PM2 | 3N0K | 1YAT | 3FBW | 1RBU | 3I78 | 3IHV | 303R | 2H50 | 1B00 |
| 3UZX | 1JYJ | 1VR3 | 2Q3U | 2F4J | 3U0K | 2ZP5 | 3HNR | 1Z6Y | 20GS |
| 4ECF | 3FIX | 2CWS | 3T5A | 3PG7 | 3MYK | 1HVE | 2JE0 | 1G8P | 1BS2 |
| 2XSG | 2XTV | 2H7J | 3QL1 | 3LBL | 3U16 | 2Z1D | 1EM2 | 4CLN | 1B2M |
| 1B2A | 4GIE | 3ZDK | 20CE | 3EZO | 1AVC | 1SL5 | 1GX2 | 1LXK | 2WQX |
| 2QLJ | 3BN0 | 1S50 | 2Z79 | 1AKR | 3G3X | 2JJQ | 2FSL | 3RIJ | 4ANX |
| 2F51 | 3LJN | 4DGP | 4AR9 | 3K7J | 2E3Z | 1UMZ | 10P0 | 1WJ9 | 1ZC2 |
| 3NFH | 3KNQ | 1ZLD | 1RYQ | 1X9U | 3NIY | 2A90 | 3ZS3 | 1KRH | 2QZI |
| 1TS2 | 1F21 | 3RQ4 | 111L | 2JEP | 1N6K | 3PXC | 1LS1 | 1T7N | 3RSM |
| 4KF2 | 1KXC | 203T | 4D80 | 4FWE | 3D3A | 4DSU | 1SRP | 1PZX | 2BRA |
| 2WUT | 1YQT | 1T6D | 3IVF | 2R58 | 3VTU | 1YD3 | 2YD1 | 3N15 | 164L |
| 3LVR | 2DZP | 1RA6 | 3Q0I | 3H4Z | 3LI3 | 1TP0 | 1YK3 | 2AX0 | 2VZN |
| 4IIK | 3V0G | 3UAD | 206S | 2G3H | 2F37 | 1CKE | 2QV5 | 3C6A | 1N50 |
| 2WLQ | 4FCW | 3EM5 | 2F0L | 3GMU | 1PGS | 2B0G | 1L88 | 3VPE | 4GKP |
| 1L30 | 3RQZ | 1TCM | 2BER | 1Q04 | 2QHE | 2CNQ | 3BCH | 4E1B | 1XRR |
| 3GEN | 3UY6 | 1RYB | 3UR8 | 2CDN | 1GBX | 20IB | 1F9T | 2IXG | 1R6X |
| 3D80 | 3K7X | 3RBS | 4KKV | 1Z4R | 2XU3 | 3FM6 | 3UCP | 3LQ0 | 2BAQ |
| 1GVD | 1C90 | 4ECO | 2B00 | 2BSB | 3AUK | 4FS0 | 1L48 | 3LDA | 3E0X |
| 1ZA4 | 3085 | 3C4C | 30GB | 1LVK | 3TOW | 1GEB | 1I01 | 1FXI | 3G9Q |
| 3S8M | 1070 | 1LP8 | 1ZUU | 1BA0 | 1LYY | 3B6H | 3HJR | 4B3F | 2IAS |
| 1YXA | 1DZF | 3F10 | 3SV7 | 2V80 | 2D3N | 3ECM | 1G6B | 2VVN | 2I1U |
| 2ZD8 | 2GY5 | 2MSI | 3LVU | 3PZ6 | 3GAX | 10I0 | 4FNV | 1KG4 | 2YHS |

|       |      |      |      |      |      |      |      |      |      |
|-------|------|------|------|------|------|------|------|------|------|
| 1PGX  | 3IUG | 4IQZ | 3A27 | 2ZP3 | 3W37 | 4FCN | 2PUS | 3I8A | 6MSI |
| 2G9N  | 2BHU | 3EDH | 2HZH | 1Z97 | 20LG | 2VLC | 1RIE | 1H4C | 2W0A |
| 4F6P  | 2XAN | 1NF0 | 2CY2 | 2JE8 | 2C3G | 3DXQ | 3UQ8 | 1Q5M | 2BK9 |
| 2YV5  | 3PL1 | 1MKR | 3G01 | 2CIS | 2Z8L | 3DU1 | 1DWU | 2PWQ | 1KSU |
| 3QAP  | 3RHX | 2IC1 | 3EDY | 1MCX | 30Y1 | 20XC | 1L46 | 2FMJ | 3C7Q |
| 2RJJP | 20LU | 3LF3 | 2VLW | 30MX | 3Q71 | 3SST | 1T6C | 3AHR | 3UL7 |
| 1LBU  | 1LQT | 3D1R | 3ST0 | 3S0J | 2ZZE | 2R0J | 3AA2 | 2B4Y | 2IGC |
| 1ET6  | 2CFM | 1JIH | 3F9R | 305Y | 4DA1 | 3JR1 | 1CFY | 1G3Q | 3LLB |
| 2JHZ  | 2V84 | 2NNJ | 1NAA | 4ALY | 2QGG | 4AWU | 1G0D | 3L2A | 4EGV |
| 1W24  | 3T47 | 1DBX | 1VZW | 1TQ6 | 303Q | 198L | 1UGD | 2QTZ | 3PSP |
| 1G7F  | 3F9D | 1L25 | 4KTA | 3F0I | 4EWN | 3K8G | 3HYN | 4A29 | 30YV |
| 2PH7  | 5EAU | 1J8R | 1F5C | 1G1W | 1CV0 | 1E30 | 4EFE | 3LY5 | 1W3W |
| 3KN7  | 2C6U | 1I1N | 1HD3 | 10YU | 1IN6 | 3VNB | 2IF4 | 2069 | 2FI0 |
| 3P8P  | 4EB0 | 3SDZ | 1SV4 | 3N17 | 3P2H | 3DJ9 | 1I3S | 2DSX | 3P2J |
| 3R8Q  | 3UGU | 4DVC | 2B1K | 1LYK | 1KIV | 1MH8 | 1S1E | 1TF4 | 1A7E |
| 1I3P  | 3PZW | 1RG8 | 3LK7 | 4FLS | 3D5J | 3IH0 | 2NZF | 3QYD | 1G0G |
| 3T10  | 4A9V | 1EKG | 2CC1 | 2A7B | 3ADJ | 3E9L | 2XNQ | 4E7N | 4AMW |
| 3L7Y  | 4B9I | 3VZI | 3D6I | 2W1J | 2VYI | 3QH4 | 4A42 | 1ALQ | 3TC6 |
| 1ISN  | 2Z04 | 3Q7X | 1JCJ | 2V6I | 3Q2U | 1ZTQ | 1JWT | 4FSX | 2YV2 |
| 3DKV  | 3LMM | 1GBS | 3QUB | 4GBF | 1P2X | 3DKP | 1G0K | 4KAC | 3F9L |
| 4KPG  | 3B5J | 1R02 | 1LGY | 1T00 | 1TJY | 2VQX | 3TK3 | 3JTY | 2B9F |
| 2ION  | 3CDT | 2RBI | 2X5N | 3I8S | 3KAP | 1TEG | 1QQ4 | 1M5I | 1KQW |
| 2F60  | 3V45 | 4FIE | 3FZ9 | 1U2X | 3D22 | 3SG7 | 3GMF | 2XDE | 4GEI |
| 3U0D  | 1WNS | 1KWF | 4ELN | 1WCW | 1PKR | 4F11 | 108V | 7CA2 | 1NUK |
| 2XQX  | 2FNC | 1MSK | 1XQG | 16PK | 1NJF | 1L04 | 1071 | 1L13 | 1GS9 |
| 4HOR  | 4GKF | 1E4Y | 1EH3 | 2QFT | 2IVD | 1MYM | 3H8Z | 1XQW | 2ZHN |
| 3MYE  | 2X1P | 3DRM | 10GW | 4HK2 | 3CEG | 1PVL | 1SBX | 3Q1C | 1J6U |
| 4ENZ  | 1DI4 | 3G0M | 3PF7 | 2QZE | 2IBJ | 1D9Y | 1IA5 | 3L6N | 1FRH |
| 3H1D  | 20B0 | 3LOQ | 4IQA | 1LAV | 3KW7 | 1CH5 | 1D2W | 1C3P | 1R0C |
| 3ERV  | 1PYL | 1CWV | 3RY5 | 3MWI | 4FCH | 1ANX | 1GYV | 4E1Z | 1H4Y |
| 1EG3  | 3HVN | 3RL5 | 2BZL | 1P9A | 2WBF | 30S4 | 1HVD | 3M88 | 2B50 |
| 3PSI  | 1NAG | 1V0B | 3G30 | 1YX2 | 3LL7 | 3UAN | 2EYP | 3N9B | 4F0J |
| 3QPA  | 3QY7 | 3AKS | 2RE2 | 2JDF | 1TG0 | 3GJW | 2VCS | 2RCA | 3NPV |
| 3033  | 2EHG | 3PE7 | 4ET7 | 1B5Z | 4H6T | 1G2R | 2YE7 | 3VA7 | 2P3J |
| 2F0D  | 2XPZ | 1Z16 | 4FVQ | 2QC9 | 1BYW | 2VQW | 3M6W | 300Y | 2V7Z |
| 3EXY  | 4AGU | 1L56 | 4DTF | 20SH | 1F0T | 1MIJ | 3CTQ | 1WCU | 2CUA |
| 20R8  | 4ESS | 3DMU | 2REP | 3PIW | 1HAR | 4AP6 | 1US2 | 4H3X | 1T7V |
| 3HR6  | 1FGY | 4H0U | 1FLP | 3FA0 | 4ENG | 3PDS | 1ZIU | 1GD8 | 1VE0 |
| 1H6T  | 2NV5 | 4H3T | 1Z2M | 3NKG | 2BDZ | 3TEG | 126L | 4IPF | 2B7U |
| 1L61  | 3DMI | 10D0 | 2HED | 3B0M | 109Z | 8I1B | 1D9W | 1HJ8 | 1D2P |
| 3Q60  | 1V6S | 4B50 | 3BYK | 3QC5 | 2WML | 4DW0 | 2BH4 | 3AWG | 4E12 |
| 2HXX  | 1T2X | 3BQW | 1YMK | 1KG5 | 3MHW | 4HWN | 2YA8 | 3UQI | 1FVJ |
| 2RFB  | 3RLN | 2ZOC | 1UJP | 2I75 | 3TVR | 3KA0 | 1F2X | 3FYC | 3LGK |
| 247L  | 3NXQ | 2VWB | 4I37 | 1JBZ | 1VWH | 3FQ1 | 4AHI | 3TW0 | 3ALG |
| 2I6G  | 2QAJ | 1GLO | 4HVL | 1WLF | 1L28 | 3LXD | 2P14 | 4AWK | 3E8T |
| 3QMM  | 1XKG | 2RAV | 4EQM | 3RL3 | 1ELT | 2IV2 | 2WRY | 4ACJ | 4GC8 |
| 3JZJ  | 3SIQ | 3AHQ | 2X80 | 306N | 2WAU | 1ZCM | 2MED | 2IW1 | 4I0Y |
| 1CP0  | 4H6H | 3EH2 | 2AJG | 1K7C | 3I36 | 3RLG | 3AJ4 | 1VPE | 2BQI |
| 3FV5  | 1PBT | 3FOA | 3TT2 | 1R6N | 1JT7 | 213L | 3SK4 | 2QPQ | 1W8T |
| 2YEX  | 3QYT | 3ZR0 | 1IYS | 3DKB | 10QG | 2F1J | 1Y54 | 2J0R | 2ZZA |
| 2WI9  | 3ZZP | 3BFK | 4FIB | 4J70 | 3UX7 | 2CIG | 20NQ | 2P0B | 3CV6 |
| 20PJ  | 3F57 | 3UNX | 2YA1 | 4I6G | 4KF0 | 3G9H | 3SUK | 4GF6 | 3BJN |
| 10JJ  | 1LI0 | 2ZYH | 2CJL | 2QEP | 3IV4 | 3TCH | 2RIK | 1G12 | 1IDJ |
| 1L9Y  | 2GN0 | 1K8Q | 1KXY | 2DEJ | 1WZV | 3RMX | 1I2H | 30QC | 2DVV |
| 2XEN  | 3AS8 | 1FUK | 3MYD | 1MGP | 1R9H | 1HCU | 3LTI | 3EWS | 2BEB |
| 1M15  | 3BM8 | 3FKG | 3ND9 | 3D4M | 1EUP | 2DYI | 1ZBM | 20J1 | 2GNC |
| 1L2L  | 1GII | 4LOE | 1Z3U | 1CVL | 3DGN | 3AJC | 1IRW | 3M07 | 3RNL |
| 1SX7  | 1J77 | 1L27 | 3NE9 | 2Q7S | 3FGX | 1UG6 | 2FSJ | 2Q00 | 1W8G |
| 1YRV  | 1KGS | 1I77 | 3AQP | 3LLK | 2Z62 | 100X | 3I5B | 4E57 | 1EY7 |
| 3NZT  | 3Q8G | 304P | 1ST3 | 2HRY | 4A1H | 3D2B | 2Q4B | 3A56 | 2ESK |

|      |      |      |      |      |      |      |      |      |      |
|------|------|------|------|------|------|------|------|------|------|
| 1QH0 | 1QGY | 3HIS | 2D7J | 1S1F | 2VU9 | 4F91 | 1FA0 | 3KG4 | 1M2H |
| 3I5P | 1G55 | 1EFC | 1M0Z | 1GBW | 1LHT | 3SHF | 1L6J | 3LUC | 3TX2 |
| 2EY1 | 4KND | 2HCZ | 4IEH | 3M5L | 2I5U | 2P87 | 104R | 2VWK | 3KJD |
| 3B05 | 3NZZ | 1HXG | 3IWI | 2FFM | 1Q1H | 4HDE | 3F59 | 1CKF | 3I2V |
| 1A7V | 1YPB | 1EY4 | 3Q93 | 3LFT | 3GL9 | 1YZ6 | 4HB5 | 3SNG | 2BME |
| 1YGE | 1GE2 | 3BKK | 4ILV | 10XZ | 4ELJ | 3QGI | 4EFF | 1V9F | 1NM2 |
| 1T1F | 3AY5 | 3P90 | 2WN0 | 3U65 | 1Y0M | 3PJQ | 3CBW | 3AX1 | 3EEH |
| 5CYT | 1E6F | 3FE5 | 3VYC | 2089 | 2X07 | 4IJX | 1E5N | 3S0Q | 3A0X |
| 1GE1 | 3PIE | 2AKJ | 2GUY | 2BW0 | 1IN7 | 1PB7 | 1NWA | 1QD5 | 2ONS |
| 1TBY | 4FDM | 20QZ | 1Y81 | 3K77 | 2X0C | 1RGK | 1PC9 | 1CJ9 | 1UWY |
| 218L | 1TU0 | 3JTB | 1NR2 | 2ZBX | 2BQC | 1R90 | 1GGZ | 3W25 | 1W6F |
| 3Q0L | 3UGC | 2IMR | 2W3L | 2VYQ | 3UN7 | 1HKG | 3TBK | 2BM3 | 2XBF |
| 1PZT | 3MKL | 1RI6 | 3G4N | 1CHK | 3FWK | 3UPA | 1E61 | 4K73 | 3DF7 |
| 2XML | 3ZFN | 20ZF | 1HH5 | 4DGD | 2FVG | 2W3J | 3FQY | 1UN5 | 3RAB |
| 10BA | 2VSY | 4BF3 | 1ZR6 | 3TEV | 4ARU | 3PME | 1ZUA | 3HRG | 4A8U |
| 2XUB | 3D0A | 2EID | 2BR6 | 1GMI | 1SPV | 3QCA | 1PHP | 2GZS | 1Z8P |
| 1H4H | 1BC0 | 1CK3 | 1FKW | 2X02 | 4F1J | 3D0U | 2QDC | 2YBU | 3DAE |
| 1U4Q | 1XT8 | 3U5R | 2RDG | 2F57 | 1KSK | 1R3F | 2FVL | 1BRY | 1QFG |
| 10CN | 2ET6 | 1GWZ | 3BB7 | 2FNN | 1RY0 | 3I86 | 2EQL | 2J8K | 1B7L |
| 2ZXT | 1R2H | 3E07 | 3M3P | 10NL | 1KH0 | 2F4W | 4DGM | 2IA8 | 1ENK |
| 1QHT | 2JDC | 1TMM | 3MVI | 3PBH | 1IY0 | 2IMG | 3CR6 | 3EZT | 3CH4 |
| 3CQF | 4E0E | 2ID9 | 3CMN | 2PNQ | 1PBG | 1KTE | 30PH | 1XP4 | 2WMC |
| 1KRN | 2DYT | 1L53 | 1KVX | 3SRY | 3FK2 | 20HW | 1F2M | 1DXS | 3MX8 |
| 1M0Z | 2BC0 | 3TU6 | 1TZQ | 4J8D | 2BMW | 3E1S | 4GKC | 2XYD | 2HZQ |
| 3IMM | 1YZH | 1DP0 | 2GWN | 1G02 | 3MDF | 4GQS | 1K1B | 3B7Y | 3A07 |
| 3LY6 | 4AX4 | 3FAW | 2WKR | 3S6E | 3IHG | 1BFG | 1YZQ | 1GZE | 2CBP |
| 1UCD | 2X48 | 2GPR | 3RR6 | 3AJD | 1JVN | 2QQW | 3CFY | 3RCB | 3P4H |
| 4K3F | 1GAI | 3N6M | 4B40 | 1EPW | 3DHM | 4E15 | 4E1Q | 1BEB | 2DT8 |
| 2HRX | 4G2A | 1KID | 3GHC | 3BHD | 2QPN | 1A6Q | 1Y02 | 1K03 | 3RRX |
| 1VZ0 | 1DLW | 20WE | 2ZW1 | 109H | 2B49 | 3DZX | 3D2Q | 3M4Y | 20AJ |
| 2EWU | 2P6N | 1TC8 | 244L | 3ESC | 1DL3 | 1QPG | 1HKM | 3SW0 | 1SBI |
| 1JL3 | 20G4 | 2XEX | 1R85 | 2014 | 3U47 | 5CGT | 3D6E | 2I1M | 3AQV |
| 4J5T | 3C71 | 2XBI | 4E06 | 10Z9 | 1L0F | 3IM7 | 3L4Y | 7FD1 | 1GWM |
| 3ILC | 3TYI | 1SGT | 30ZX | 1H1N | 4GNI | 1W0H | 4EYE | 3CPI | 1P5J |
| 2A1V | 3NRN | 1NDB | 3LNB | 2F6B | 1N1X | 3VFD | 2VZT | 3IXM | 1N83 |
| 2FB0 | 4G31 | 1B9K | 3NWM | 2AL7 | 1GCI | 2QX5 | 3Q69 | 1V76 | 3W4T |
| 2GQP | 1XJZ | 1SBT | 3UWB | 1CUB | 2CWD | 1W74 | 3NLL | 1CCJ | 1G8A |
| 1Z2N | 2GJJ | 2GHS | 2BBT | 2J5X | 2HUJ | 2CBZ | 4EXU | 3H7U | 1NA7 |
| 176L | 2PTK | 2NQW | 2ODP | 3F85 | 2A28 | 2VWX | 4GRF | 205W | 2W7T |
| 4HW6 | 1TAQ | 1V9H | 4CGT | 3Q6Z | 3L4N | 1QTD | 3L86 | 1FGM | 3PUC |
| 2F2W | 2RBM | 4EPR | 1QJW | 4KVF | 1TXX | 3C8Y | 3SBY | 1F4P | 3RH3 |
| 4ATE | 3UF8 | 1F5B | 4EYT | 3DS8 | 3KPA | 1KAB | 1I3U | 3EAP | 4HB9 |
| 1PSW | 1B04 | 2CN3 | 3GD0 | 3HZL | 3S4E | 2Q8W | 2VX7 | 3KX3 | 205F |
| 2F0T | 1LY8 | 1RUT | 1KX0 | 1XNC | 3FK8 | 1KTQ | 3FJ0 | 4EEP | 1MWC |
| 2ZNR | 1HPT | 1PMH | 2IFY | 1MEG | 4JPO | 3EFL | 3QRL | 3IVE | 1U29 |
| 2ZQU | 1JIX | 3UON | 3MMD | 1DJA | 3HX3 | 2C7X | 2EPG | 3ASM | 2YXP |
| 2AA2 | 3SIM | 2J1Y | 2Q7T | 3P5S | 1STY | 1IRV | 3L87 | 20ML | 1ILE |
| 4KK3 | 1R9W | 1FCA | 1MDP | 3EUR | 3GC8 | 1JYK | 1G05 | 1I4N | 1EX9 |
| 4IKM | 1BF6 | 1PC4 | 4HJ0 | 3LIJ | 3V2I | 1ZD1 | 2Z60 | 10S8 | 1M6I |
| 3E1T | 1G6I | 3LS8 | 30LV | 30LI | 3Q6B | 2HKL | 2DZT | 1XHC | 2QFL |
| 3BIR | 10QH | 4ATF | 1L33 | 3PE5 | 3SU6 | 3HY5 | 3FG6 | 1EUE | 1ND1 |
| 2YJR | 2VNG | 3U81 | 1X9Q | 2Y23 | 1G6S | 1P50 | 1NH1 | 1RXD | 4FSH |
| 1LJ5 | 2QC3 | 3RJX | 3HRP | 1DPP | 3IAR | 2BK0 | 3TKM | 2PX2 | 2IAX |
| 4J37 | 2CTH | 1R8M | 3QJ4 | 2WZH |      |      |      |      |      |

**Table 10. List of PDB IDs of all new homodimers (Test-set 2)**

|      |      |      |      |      |      |      |      |      |      |
|------|------|------|------|------|------|------|------|------|------|
| 4D28 | 4QDS | 40IT | 4IZW | 4UTT | 4NEI | 4NEX | 4PUA | 4QGI | 2FHE |
| 4TVI | 4B0Q | 4Q0A | 4C6E | 4I9E | 3W5X | 4GTU | 4J72 | 4I02 | 4C6U |
| 3WFI | 405F | 2GR6 | 40GD | 4V0Q | 4NUR | 4RA5 | 4X0X | 4Q1V | 4N0G |
| 4LUK | 4M02 | 4RZ0 | 40MZ | 4PTS | 4L1A | 4BJP | 4NFH | 4W72 | 4ISY |
| 3WSC | 4Z04 | 4NYF | 4HGD | 4YWQ | 4RUQ | 40UN | 4BT7 | 4040 | 4QEZ |
| 4V2K | 4QL4 | 40BU | 4S2R | 4MYP | 4KA6 | 40AA | 4Q0C | 4JEM | 4D1Y |
| 3ZF8 | 4C9X | 4C51 | 4LQB | 4PBS | 4RIT | 4KQF | 4WXG | 4RUF | 4P5E |
| 4NPB | 4PUC | 4Q1Y | 4RX0 | 2YNA | 4LA1 | 4KV3 | 4KES | 3WAF | 1BAI |
| 4MA5 | 4K5S | 4RDZ | 4LNS | 40M8 | 4K80 | 40ML | 4DMC | 4J7R | 4NEL |
| 4Y0H | 4PIB | 4NZ1 | 4L51 | 4WP0 | 4052 | 402D | 3VY5 | 4UTT | 4BAT |
| 4QDK | 4YL5 | 4CVS | 1NJU | 4XA8 | 4TM5 | 4LMI | 4JTU | 4L3V | 404V |
| 4MYZ | 4UX7 | 4RMM | 1F08 | 4MKI | 4BI9 | 1KEQ | 4C0W | 4K2A | 4IY4 |
| 4V12 | 4CW5 | 4U0W | 4WOP | 4KGH | 4CN6 | 4S0M | 4RA8 | 4CN1 | 4KU3 |
| 3WY0 | 4CF3 | 4M2M | 4GS1 | 4N2M | 4AZR | 4IY3 | 4JHB | 4CXT | 4LTA |
| 4LHD | 4M6Y | 4PH9 | 4CX2 | 4Q1X | 3W91 | 4NZV | 4BT8 | 4MF5 | 4S1H |
| 4PDX | 4L2C | 4CZ8 | 4QF2 | 4W66 | 4LJ3 | 4018 | 2YNW | 4BYY | 4V23 |
| 4LAM | 4MUZ | 40QP | 4MF1 | 4N12 | 4CGX | 4CMZ | 4MRI | 4AZ0 | 4L4J |
| 4QGR | 4PL0 | 3WW8 | 4K59 | 4LW0 | 4Q04 | 4CJ7 | 4LUM | 4US5 | 4M71 |
| 4FDA | 405A | 4MPF | 4JEN | 4L0K | 4L28 | 4KEU | 4RK0 | 4C12 | 4MAK |
| 4I6T | 4NA0 | 4W8J | 4TR8 | 4CBS | 4H4I | 3ZGY | 3WUR | 40U0 | 4W4N |
| 4PVV | 4TKZ | 4WUJ | 3WJ8 | 4TL3 | 4DK2 | 4BMX | 4L0D | 4LI1 | 4NLJ |
| 4QGK | 4CMD | 4Q69 | 4WNY | 4MAM | 4RL2 | 4L3K | 4BG9 | 4K5E | 4MF3 |
| 4YER | 4RL6 | 4MZM | 4PQA | 4C1B | 3WBH | 4LE5 | 4Q1E | 4UPA | 4R5M |
| 4WK5 | 4L7B | 4UAK | 4IV8 | 4BGA | 4Y30 | 4KQD | 4LOJ | 4NUQ | 4NMH |
| 4UNU | 4MAF | 4P1V | 4019 | 4GW0 | 4N0Z | 4MUR | 4RYK | 4ZAS | 4P0E |
| 4MYJ | 3ZIG | 3WNZ | 4D3U | 4UPG | 4L06 | 4WPC | 4L6Y | 4C5W | 3WMD |
| 3ZI0 | 3ZIH | 4R2V | 4I5Q | 4N2C | 4KG1 | 4CNN | 4LJI | 4B96 | 4Y0M |
| 4098 | 4RT5 | 4RCT | 4050 | 4NDK | 4C2H | 4BEI | 4CBR | 4C5J | 3ZCD |
| 4P96 | 4HHV | 4NB1 | 4LUY | 4XI2 | 4PZ1 | 4RRX | 4YYC | 4LDI | 4Q6R |
| 1ZPK | 4MEB | 4JDA | 3WAD | 3WXY | 4CVR | 407J | 3WY0 | 4Q1W | 3ZBG |
| 4KMM | 4N06 | 4Q9V | 4P22 | 4INE | 4PW2 | 4COB | 4Y67 | 4EIL | 4LFU |
| 4Q5F | 3WF3 | 4K3G | 4JAU | 4QVS | 4C8B | 4LDV | 4WPE | 4ILU | 4I6U |
| 3X0V | 4H0R | 4YLT | 4NVR | 4D0A | 4X7V | 4NN1 | 4UTU | 4KFG | 4GNJ |
| 4P61 | 4CWZ | 4GKM | 4WJY | 4TNU | 4XVV | 4CET | 4S39 | 4D5J | 3WCO |
| 4L95 | 4WPD | 4NPO | 40VM | 4LGQ | 3WBR | 4CHS | 4LAL | 4BJN | 4D6K |
| 4CP8 | 4QR2 | 1K2C | 4KDE | 4HTX | 4XF5 | 4PY4 | 4N1D | 4LS6 | 4L9W |
| 4QXW | 4USS | 3WD8 | 4CJX | 4C11 | 4L1C | 4MUM | 402H | 40PE | 4PZK |
| 4KM3 | 4Q9C | 4NTE | 4KCE | 4PH6 | 3VY2 | 4LDU | 4IYS | 4FRA | 4S28 |
| 4CKN | 4NV4 | 4KC1 | 4KXV | 4KJD | 4D7M | 4L76 | 4HZI | 4LE9 | 4RHA |
| 4QGT | 4L57 | 4OQY | 4YSW | 4BKQ | 4LDP | 4XD1 | 4XK1 | 40VY | 4WBQ |
| 4KRW | 4W8I | 3W9B | 4NQF | 4W6S | 4C2S | 4UQV | 4HKD | 4NQ1 | 4GQZ |
| 3W65 | 4PN0 | 406B | 4BWZ | 4RBR | 4X9K | 3ZPX | 4LC3 | 40MV | 4Q0I |
| 4BOL | 4PBR | 4RMB | 4CJN | 4KC5 | 4CID | 4W6C | 1Z8C | 4IRH | 4BNE |
| 4U6S | 4MDZ | 4MJ7 | 4015 | 4BWV | 4TR7 | 4057 | 4JAK | 4NR2 | 4BRC |
| 4KZ1 | 4CDH | 4JPF | 4C10 | 4YN9 | 40CA | 4MND | 40MM | 3ZBK | 4P08 |
| 4MDC | 4QXP | 4Q9A | 4OP7 | 4LOI | 4TR6 | 4D3V | 4OJR | 4RM1 | 3WJE |
| 4Q5N | 4K1V | 4NJV | 4QHJ | 4S2A | 4Q52 | 1K1U | 4YWN | 4D3D | 1VP6 |
| 4JEJ | 4OJA | 4NFL | 4QR8 | 4RDA | 4LDK | 4XLY | 4U1F | 4Y2H | 4KEV |
| 4BMM | 4OK4 | 4NPT | 4RIF | 4MDU | 4U77 | 4MG4 | 4P52 | 4BW5 | 4RKC |
| 4IS7 | 4MPM | 4Q5Q | 401Z | 4IK8 | 4V2X | 4TPL | 4N83 | 4XWS | 4ODJ |
| 3W79 | 4Q2H | 401G | 4LOB | 400F | 4QDY | 4MF7 | 4DLN | 4RPO | 4NG6 |
| 4RK6 | 2I99 | 4CUL | 3WGH | 4U64 | 40J4 | 4KVI | 4DM7 | 4U7X | 4OCI |
| 4P7C | 4Q60 | 4X1Z | 4N5V | 4LDY | 4C8A | 4BXI | 4P4T | 3WPW | 4N2E |
| 4UDS | 4JN9 | 4LHS | 4PUL | 4WJL | 4KL6 | 4KQK | 4POC | 4MAE | 4RMF |

|      |      |      |      |      |      |      |      |      |      |
|------|------|------|------|------|------|------|------|------|------|
| 3WPS | 4RXJ | 4K5C | 4RZG | 4QJN | 3W62 | 1Q30 | 4IP5 | 4NEZ | 4MB0 |
| 4XDA | 4X0R | 4MNF | 405V | 40FX | 3HN0 | 4I97 | 4IT6 | 40V4 | 3W6P |
| 4BS9 | 4KPR | 4MHX | 4NV1 | 4KLA | 3WLC | 2WLV | 4QKU | 4W91 | 4087 |
| 4CVP | 4J2P | 4IBG | 40W8 | 4MH4 | 4PY6 | 4HR0 | 4Q34 | 405Q | 4R9X |
| 40Y3 | 4R33 | 40K5 | 4PN6 | 4C7L | 3TLD | 4BF5 | 4MYC | 4MRS | 4KYX |
| 4MVC | 4LP7 | 4W97 | 4YN7 | 4L9M | 406Z | 4UVQ | 4D02 | 4Q25 | 4H01 |
| 401D | 4UC1 | 4WD2 | 4PET | 4WUM | 4UMP | 4M9D | 4MZE | 4XEU | 4H5U |
| 4BAZ | 4M03 | 4Q2Q | 4W7P | 4CU5 | 401B | 4MKN | 3VWR | 4LU1 | 4QAR |
| 4WD9 | 4BHW | 4CV4 | 4JZP | 4KM4 | 4N9U | 4L2B | 3VWL | 4XDY | 4LJL |
| 4YR1 | 4RG1 | 4N18 | 4S1A | 4N2K | 4MMN | 4BMZ | 400G | 40IV | 4UZV |
| 4M6A | 4LW8 | 40Q4 | 4X84 | 4V0P | 3WGQ | 4KMH | 3W36 | 4NY2 | 4K07 |
| 4M0I | 3ZHR | 4QRI | 4JEL | 4GIT | 4QGE | 4C98 | 3WXL | 4WJA | 4L0M |
| 4IG2 | 4QYR | 4WX0 | 4CUC | 4KP7 | 4BEU | 4LIR | 3WMM | 4G1P | 4U04 |
| 4Q6K | 4MUD | 4UQU | 4NSQ | 4HEG | 4HA8 | 4LMB | 4JS9 | 4KN8 | 4V0R |
| 3WRA | 4Q9M | 4PTE | 4W82 | 4K2M | 4JVI | 40MN | 4UR6 | 4NAX | 4QV2 |
| 3WF1 | 4JB6 | 4CNG | 4LH4 | 4QAV | 4LCJ | 4RP3 | 4LMW | 4RT7 | 3Z0M |
| 4K4Q | 4IAN | 4BSW | 4MCJ | 4ULV | 4BX2 | 4YFJ | 4RYI | 4KCC | 4YTY |
| 400X | 4P9G | 4HWS | 4N2F | 4K6K | 3DQZ | 4KY9 | 1T03 | 4WKY | 4PFH |
| 4K7N | 4ICS | 4X7U | 4Q6U | 4L75 | 4L9T | 4L56 | 3VZ2 | 4KLR | 4RI6 |
| 3WA3 | 4NDS | 4QVB | 4M07 | 4KQI | 4CX5 | 4KR5 | 1DAZ | 4DMH | 4CVQ |
| 4MCR | 4CE0 | 3DCR | 4NUM | 4ICN | 4NUB | 4096 | 4UXL | 4PXB | 40N3 |
| 4ZAH | 40KY | 4IZ6 | 4WHJ | 4RKQ | 4060 | 3WQF | 40BQ | 4J0E | 4LRQ |
| 40MP | 4WJI | 4WZU | 4PU7 | 40MH | 4MN7 | 4NJH | 4IQL | 4CXJ | 4P0B |
| 4C11 | 4TV7 | 4KET | 4LQD | 4MF0 | 4UZI | 4LMA | 4IFT | 4NJY | 4CS3 |
| 40PH | 4017 | 40AH | 4N20 | 4LZV | 4PZU | 4KG0 | 40T9 | 4IG2 | 4LFI |
| 4MQB | 4HNN | 4K2E | 3W63 | 4BKD | 4M5P | 4K09 | 4G64 | 4C6N | 4LL7 |
| 4LU6 | 4CWE | 4HQ0 | 4UNK | 400D | 4P0D | 4Q7E | 4XIW | 4TRH | 4MEI |
| 4NA1 | 4R5K | 4MQ0 | 4BKM | 4RK4 | 4P5N | 4M9U | 4TSX | 4QS6 | 4IG4 |
| 4UXU | 40WY | 407U | 4LDQ | 4PPY | 4YET | 4G9U | 4NNZ | 4Q75 | 4M8Z |
| 4BQE | 4JIS | 4KZP | 4IX8 | 4HZF | 4C50 | 4V03 | 4LXX | 4PBC | 4UC3 |
| 4M37 | 4Z0P | 4S3M | 4U0S | 401E | 4TPH | 4JM0 | 4Q86 | 4BJA | 4MXU |
| 4RXK | 4JGX | 4R82 | 4KP9 | 4XUV | 3WG3 | 4Y13 | 4RY8 | 4BMU | 4YRU |
| 3W2J | 4D5Q | 4WSH | 4HMW | 4FQW | 4NUA | 4USA | 3WX0 | 4QNC | 3WVA |
| 4C6P | 3Z0L | 3ZPN | 4FZ0 | 40MG | 4TN4 | 4NPU | 4N1Y | 4PXD | 4KQE |
| 4ME9 | 401W | 4P3M | 4W7C | 4UPD | 3Z0A | 4UNL | 10RF | 4Q0J | 4NL5 |
| 404W | 4M51 | 3WXZ | 4PHC | 4FRH | 3WAN | 3WJC | 4TPT | 4P82 | 4Q9B |
| 4N6Q | 4C72 | 4DMF | 4UVJ | 4CKI | 4BMY | 4MIS | 4CTD | 4WBD | 3VWN |
| 2J9K | 3W1W | 4JC2 | 4QFH | 4UCH | 3WU0 | 4JZX | 4CUR | 4IQB | 4Q70 |
| 3WJK | 4US5 | 4D3T | 4NQU | 4PV4 | 4P4U | 4BWI | 2AZB | 4IGM | 4RDW |
| 3WYW | 4IPP | 4MYY | 4UP7 | 4RDL | 3WCN | 4MK6 | 1V3Z | 3ZG1 | 40MQ |
| 4QMK | 3W77 | 4X8C | 4MJK | 4P53 | 3ZII | 3WJG | 4L03 | 4MB6 | 4K0A |
| 4NVT | 3WRW | 4MPL | 4KPD | 40TM | 40YH | 4PSH | 2WLV | 4WH5 | 4N7J |
| 4WZI | 4C8P | 4ICQ | 2Y0R | 1HEG | 4GQM | 4FQS | 4J00 | 4LIT | 4W5K |
| 400E | 4WCW | 4W4R | 4WZ8 | 3ZCP | 4BSW | 4S1W | 4U9A | 4PCL | 4L04 |
| 4NVQ | 4LON | 4M57 | 4CIJ | 4LW2 | 4CU0 | 4BW9 | 4KLC | 4URP | 4LS7 |
| 4C08 | 40TN | 4KPW | 4FYM | 4WER | 4RJV | 4D1P | 4G09 | 40M7 | 4MID |
| 3WQM | 3X16 | 1C1X | 4Q4K | 4PGG | 5AK2 | 4CVT | 4LMV | 4RKK | 4P3V |
| 4KP0 | 4NHF | 4RPI | 4R9L | 400F | 4Q62 | 4D5S | 4C2E | 4N8P | 4CN0 |
| 4PYQ | 4KZN | 4PW0 | 4IJY | 40H3 | 4P80 | 4GCV | 3DCK | 4UUY | 4XVZ |
| 4LAN | 4XLV | 4MP8 | 40R8 | 4XYZ | 3WY7 | 4BTX | 4L6Q | 4J8Z | 2Y0B |
| 4RFA | 4000 | 4XM5 | 4NHW | 4XJQ | 1K2B | 4PNI | 4PCV | 4XEA | 4FR0 |
| 4GRC | 4U3E | 4NSR | 4D5I | 4NAD | 406I | 4LE6 | 4K26 | 40JZ | 4UNV |
| 4L4U | 1A94 | 4QQ7 | 4JU5 | 4BJ4 | 40A8 | 4RNA | 400J | 4GH0 | 4R5F |
| 4C91 | 4KFA | 4KV2 | 4MAQ | 4MJF | 4KPJ | 4QHR | 4KCX | 2GSR | 4KER |
| 4FRQ | 4C0N | 4RQT | 4QLY | 4M4X | 4TKR | 4JEF | 4N4W | 40KE | 4PXE |
| 3TM3 | 3W0K | 4TWE | 4RG7 | 4LQX | 4NH4 | 4TQ2 | 4XCV | 4D3S | 3WQN |
| 4MQD | 4TTB | 4LZA | 4TV0 | 4Q05 | 401U | 4WAI | 4R2K | 4R0B | 4HA7 |
| 4JE6 | 4KIB | 4LDR | 4W9R | 403V | 4CUD | 407H | 4NOC | 4Q2N | 3W6S |
| 4BEX | 4RI1 | 4RHP | 4R8Z | 4MZA | 4NPX | 4L7E | 4DMK | 4L69 | 4PHJ |
| 4XIN | 4WII | 4U5H | 3WV0 | 4KT8 | 4C09 | 4TOP | 40QZ | 4C5C | 40PF |



|      |      |      |      |      |      |      |      |      |      |
|------|------|------|------|------|------|------|------|------|------|
| 4X7Y | 3ZBL | 4R14 | 4KP2 | 3X1B | 4RT0 | 3VWM | 3W01 | 4RP9 | 4007 |
| 4LUL | 4YIC | 3ZIE | 4GT2 | 4QIN | 4IZU | 4HHD | 4KUK | 4WIS | 3WJF |
| 408T | 4X1E | 4N05 | 4MU0 | 4PDT | 3WJD | 4LE0 | 4PON | 4ILF | 4N9J |
| 3W0J | 4R7Q | 4CVY | 4M0Q | 4RCV | 4NQI | 4GSN | 4L96 | 4M23 | 4RNI |
| 4WSE | 3W8Q | 4KY4 | 4X4W | 4CL7 | 3Z0K | 400V | 4YF1 | 4PW1 | 4NTD |
| 4G2R | 1C1X | 4NJS | 4M8M | 4JT4 | 4IZH | 1GQP | 4FFJ | 4D1E | 4Q30 |
| 4BOU | 4X26 | 3WDM | 4PPU | 4UBT | 4QC2 | 4MWS | 4CPK | 4K1U | 40JX |
| 4CF5 | 4BNB | 4L9J | 4UUU | 4KP9 | 409K | 40VE | 4P5X | 4S24 | 4BMK |
| 40AG | 4IA8 | 4P6D | 4YFV | 4MPC | 4Z1I | 4U9N | 4CII | 4CF4 | 4L74 |
| 4M8Y | 4BRK | 4X54 | 4HK7 | 4XCZ | 4NMC | 4N0R | 4PZJ | 4W6D | 4XAR |
| 4BY5 | 4IX3 | 2YPY | 3WY0 | 4CVH | 4MTS | 4ND6 | 4RJ0 | 40JT | 4RGP |
| 4I6R | 3ZHC | 4RD7 | 4LOA | 4XG0 | 3VWQ | 4MM0 | 4RI7 | 4BVA | 4LW7 |
| 4JH2 | 400A | 40B6 | 40EJ | 4COG | 400E | 4I71 | 4NXI | 4KEP | 3WVW |
| 3ZKB | 4RSW | 40H2 | 4IJ7 | 4KBX | 4BJQ | 4C7V | 4M73 | 4KGB | 4X51 |
| 4QB0 | 4W99 | 4MZ0 | 4JBR | 4MY2 | 3WTD | 4NKE | 406M | 4BEQ | 4C18 |
| 4NMI | 4N81 | 4PX0 | 4XIY | 3WW0 | 4MZW | 4CHL | 3WHB | 4C00 | 4RIG |
| 3WX4 | 4NE7 | 4P5W | 4IZS | 4053 | 4PMU | 4PBB | 4XDZ | 4R1H | 4Z24 |
| 4MCS | 4HS2 | 4QND | 4R1I | 4MYB | 4NVS | 4MS0 | 4HSL | 4NFR | 4NDA |
| 4R4Y | 3J7T | 4Q16 | 4XLL | 4QBA | 4WWB | 3WFW | 4TMC | 4HPW | 4WU0 |
| 4MXT | 4RK1 | 4IGN | 4TS5 | 2YQ1 | 4NQT | 4Q0M | 4XL0 | 3WK6 | 40L9 |
| 4KV9 | 4C08 | 4RNH | 4QA0 | 4HAR | 3WRV | 4NK2 | 4R9K | 4PFZ | 3ZML |
| 3WGT | 4CI9 | 4BIA | 3W60 | 4Q97 | 4RGD | 4D6Q | 4NWS | 4HKE | 4BZP |
| 4RYB | 4N1V | 4IZV | 4RZE | 4PR3 | 4CND | 4KUH | 40AQ | 4LBU | 3WWM |
| 4JBL | 4CNQ | 4B8V | 4MDS | 1K1T | 4M7X | 4LSB | 4R2J | 4JEQ | 3VWP |
| 4QHG | 4MNU | 4M6X | 4PUP | 3WRB | 2AIG | 3ZDR | 4LH8 | 4QYS | 3WYD |
| 4R8E | 40HQ | 4Q5R | 3ZEI | 4NEW | 4RAA | 3W5Z | 4LLE | 4M9R | 4MCB |
| 4LDS | 4KTW | 4WUB | 4MXM | 4N2H | 4CP3 | 400C | 4047 | 4Q76 | 4HMS |
| 4QFJ | 4HWT | 4RRW | 4MCN | 4N0W | 408B | 4054 | 5AIR | 4LOW | 4PB4 |
| 4CW4 | 3ZCS | 4JPH | 3WKX | 4RGK | 4BRD | 4WBT | 4PWY | 4R60 | 40W5 |
| 4RZ7 | 4MK3 | 3WFZ | 4MJZ | 4Q51 | 4NAS | 4XR9 | 4QX0 | 4TRT | 4N0V |
| 4U6D | 4PUM | 4NES | 4R7F | 4LTB | 4RZF | 3WG4 | 4YVD | 3RVB | 3W8S |
| 4CHI | 4IRG | 4NAZ | 3WJP | 3W20 | 4HEH | 4S0K | 4LIS | 3WML | 4MTC |
| 3W08 | 4R9Z | 4RFQ | 4NZY | 4C6S | 4MYM | 4RZ3 | 3W8G | 4KTI | 4LN9 |
| 4YEA | 4MZV | 4T0I | 3ZHK | 4MEA | 4RMJ | 4K87 | 4PWW | 3W61 | 4Q50 |
| 4M0K | 3IFD | 40I3 | 4UBW | 4LLS | 4XHC | 4HHP | 4LUI | 4Q7I | 4N4C |
| 4L9E | 4M72 | 4T08 |      |      |      |      |      |      |      |

**Table 11. List of PDB IDs of all new monomers (Test-set 2)**

|      |      |      |      |      |      |      |      |      |      |
|------|------|------|------|------|------|------|------|------|------|
| 3W42 | 3WDQ | 3W5F | 4MSD | 3W06 | 4YZ8 | 4HAL | 4J7W | 4V16 | 4L6P |
| 4Q9H | 4FXV | 4EQC | 3W0S | 4XFK | 4TMD | 406E | 4LGJ | 4H34 | 4NNR |
| 4PJR | 4N7A | 4K91 | 4QXL | 4L4H | 3WBY | 4CL2 | 4CFS | 4PP4 | 4C2Y |
| 4N1X | 4NMY | 3MDJ | 4HQZ | 4RLV | 4IK5 | 2YP6 | 4K11 | 4UYE | 4MLA |
| 4P0I | 4PIP | 4ILY | 4QBE | 4TS4 | 4N01 | 4KUL | 3I3J | 4L4G | 4TPN |
| 4IFJ | 4CIT | 4R1J | 4BYM | 4NV5 | 4B5Z | 4MLV | 4BM8 | 4OY4 | 4UR4 |
| 4N0N | 3VXK | 4NU2 | 4ROW | 4025 | 4MNP | 4MX1 | 4PX9 | 3WT9 | 4P29 |
| 3WPF | 4KF4 | 402X | 4003 | 3W8K | 4PQ0 | 4OY8 | 4LT9 | 4LND | 4RY4 |
| 408G | 4PQJ | 4MJE | 4C75 | 4NGU | 4K0N | 4L3L | 4R3C | 3WZ1 | 4M7V |
| 4CIZ | 3ZBU | 4RXT | 40EA | 4M68 | 4QLG | 4N0Q | 40H0 | 4LA3 | 4QTB |
| 4C7D | 4W05 | 4QHW | 4IUG | 4QY4 | 4CZN | 40AN | 3WEI | 4N14 | 3WH1 |
| 4Q4N | 4U3V | 4TLP | 4KWE | 4JCN | 4MX8 | 4IC4 | 4PIO | 4LU4 | 4MI5 |
| 4KYC | 4K33 | 4PZV | 4K5Q | 4M1V | 4K19 | 3W8M | 4PMA | 4LR2 | 4LIM |
| 4G4X | 4LZL | 3W0V | 4IRL | 3WUQ | 4RH0 | 4HRA | 4M4Z | 4LAA | 4TY0 |
| 4R6D | 4Q0K | 4QPM | 4UP5 | 4JTR | 4R0V | 4RCI | 4PQ0 | 4BM1 | 3WLT |
| 4NYZ | 4BTV | 4BMJ | 4004 | 40MK | 4P56 | 4MQU | 4Y0K | 3W9V | 4CDJ |
| 4U9Q | 4YFS | 4NSS | 4QDJ | 4WE2 | 4LTZ | 2YPM | 4C4M | 3WSP | 4LDJ |
| 4RBM | 4MSX | 4I2Y | 4QLH | 4CQI | 4IZE | 4MNR | 4I04 | 4QJL | 4BX0 |
| 4KA8 | 4BR5 | 4KRI | 4MBR | 4080 | 4QK3 | 4000 | 4NSP | 4LQZ | 3WWC |
| 4NLY | 4NS5 | 4Q63 | 4URN | 4MKH | 4MRU | 4L5V | 4D6G | 4LPC | 4N0N |
| 4UF0 | 4PIV | 4H9W | 4LHV | 4JS1 | 4PQ6 | 4M90 | 4I5X | 403X | 4P09 |
| 4QEU | 4C0K | 1A5I | 4G3N | 3W2Y | 4LK4 | 4MAD | 4R98 | 4PVA | 4TN8 |
| 4P04 | 4RWH | 4NFE | 4ME8 | 4WVL | 4UMG | 40KR | 407I | 4UIT | 4BQ2 |
| 4BXQ | 4RTI | 4P2F | 4CJ9 | 3WA8 | 4L15 | 2YNU | 3WR2 | 4M4P | 4GT8 |
| 4K82 | 4OZX | 4I4C | 4N9P | 3WF7 | 4P0Y | 4LJ9 | 4LZ6 | 4LW3 | 4JA7 |
| 4C2X | 4CFI | 4MMG | 3WLU | 4HP5 | 4KLZ | 4K47 | 4R9F | 4TR0 | 4B5E |
| 403F | 3WHP | 4BG4 | 4P80 | 4G32 | 4WBY | 4B5N | 4XVH | 4KKY | 4M82 |
| 4LE8 | 4MIW | 40TF | 4RUN | 4C8D | 4P15 | 4RI5 | 4Q5M | 4BZY | 4UMT |
| 4CH7 | 4XE4 | 4U0P | 4N4B | 4R39 | 4L7V | 4MFJ | 4PPJ | 4N6T | 4033 |
| 3WQ8 | 4P0C | 4MFH | 3W8L | 4B4X | 4QYN | 4QTZ | 4BSX | 3VVG | 4CRR |
| 4RSH | 3ZK7 | 4G97 | 4Y9T | 4MD6 | 4MTH | 4ME2 | 4CRS | 4PU5 | 4MLL |
| 4BGF | 4WS0 | 4NB0 | 3WT1 | 4W59 | 4KR1 | 4Q2C | 4L3W | 4PHF | 4WK7 |
| 4Q2W | 4LW5 | 4JB1 | 4KW3 | 4LTT | 4J5L | 4X55 | 4Q88 | 3WD1 | 4BG5 |
| 4V38 | 4RX8 | 3W0Q | 4CK4 | 4NFB | 3WN0 | 4UZL | 4QUK | 4LUH | 4L6G |
| 4CHH | 4YAH | 4KFW | 4MEW | 4YGJ | 4QS9 | 4QA1 | 4LT6 | 4C29 | 3WCQ |
| 4QGW | 4XP8 | 4R6W | 4BQN | 4QW0 | 4MX0 | 4QQS | 4LZC | 4L1D | 3WWL |
| 1FH0 | 4QQT | 4PAB | 4MYU | 4WGI | 4BJK | 4RNL | 4IEB | 4TMT | 4KNN |
| 4PBH | 4XJ5 | 4BPC | 4MQ3 | 4M4U | 4L6R | 4IL8 | 4HR0 | 4RY6 | 4D1S |
| 4P7Q | 4JRU | 4HQS | 4CJM | 4PSU | 4KMA | 4NOJ | 4KIA | 4MM0 | 4BUH |
| 3ZIX | 4FDT | 4COU | 4X92 | 4L78 | 4M2V | 4MJB | 40HI | 4P8N | 4KP1 |
| 3WEW | 4P9K | 4WQK | 4UMW | 4QAL | 40VR | 4CP6 | 4ORN | 4BF7 | 4Q07 |
| 4M01 | 4P55 | 4NV0 | 4LEE | 401S | 4Z02 | 4LZD | 4UU4 | 4NFM | 405T |
| 2Y72 | 4JH0 | 400S | 4C20 | 4R2B | 4GQK | 4D0P | 3WDW | 4N6X | 4JR6 |
| 4P8V | 4CEK | 4RYA | 4QAW | 4V2U | 4NI6 | 4CZW | 4V2A | 4I84 | 4WGH |
| 4IQ2 | 4J0X | 4JWJ | 4KNK | 3WP4 | 4MXX | 4C23 | 4KRG | 4KEI | 4L0F |
| 4N82 | 4KE6 | 404C | 4PTB | 4PF4 | 4OZ5 | 4NZQ | 4NOV | 4Y0D | 4YPJ |
| 4LII | 4MR0 | 4QLE | 4UUC | 4P0G | 4J3B | 3W81 | 4G08 | 4JL5 | 4LOT |
| 4R61 | 4ODG | 4Q4G | 4ZBG | 4LSA | 4Q91 | 3WQ6 | 4NCK | 4K84 | 2040 |
| 4Q53 | 4RK9 | 4M01 | 4Q9W | 4CSS | 4LZI | 4LEG | 4I08 | 4L3N | 4MX6 |
| 3ZJ0 | 4N57 | 4QBI | 4RWZ | 406G | 4BQS | 4I2D | 4MVF | 4WUI | 4D6E |
| 4QAU | 4HZG | 4ULW | 4RV5 | 4OUJ | 4MGJ | 4RKF | 4LGG | 4BK0 | 4P5S |
| 4WA9 | 4Q8G | 4NUX | 4KEK | 4UBH | 4OQR | 4X96 | 4029 | 4MZC | 409L |
| 4008 | 3BFN | 4LEW | 4BHR | 4NUY | 3ZIV | 4PA8 | 3WJU | 4BBP | 4W8B |

|      |      |      |      |      |      |      |      |      |      |
|------|------|------|------|------|------|------|------|------|------|
| 4UM2 | 4N08 | 4NJC | 3WNK | 4CB7 | 4OZA | 4Z7X | 4NUI | 4PPT | 4JCG |
| 4LGN | 4IJG | 2YNX | 4UWR | 4Q05 | 4M8I | 4KM7 | 4KMY | 4R12 | 4YBG |
| 4C1D | 4L4E | 4KYV | 4Z48 | 4J3V | 405P | 4CSV | 4QNY | 40FL | 4P00 |
| 4KFV | 4JMQ | 4QU3 | 4MJA | 4MKM | 3WWG | 4BN1 | 4W0K | 3P9U | 4C4D |
| 4PM8 | 4BIN | 4XHK | 4C9P | 4RV9 | 4PGR | 3ZFY | 4QCJ | 4WEI | 3WBJ |
| 4RLK | 4KRU | 4POW | 4QY7 | 4CUA | 3WDV | 3ZGJ | 4BVW | 3ZLE | 3WHK |
| 4PF6 | 4RV7 | 4MHQ | 4WZR | 4M5E | 4CSI | 4XEQ | 4KZS | 4WBS | 4CC0 |
| 3WKZ | 4K3B | 4LRC | 4YJW | 4CBT | 4TUU | 4Q2T | 4D6H | 4CTJ | 3WJ9 |
| 4WOH | 4IBY | 4M9Q | 4W70 | 4LJ1 | 4HIC | 4CQE | 4MQL | 40LK | 4D6S |
| 4JP6 | 4R9V | 4PVE | 4M00 | 4LEF | 4TYX | 4GN2 | 4IFG | 4QBU | 4RDB |
| 4Q03 | 4YUD | 3WW9 | 4WJU | 4O2T | 4LQU | 4M8U | 4PUI | 4R80 | 40D6 |
| 4PJL | 4K7J | 4Y0G | 3WP3 | 4JU3 | 408Q | 4TN0 | 4PHG | 4PJK | 4QPW |
| 4X8E | 4CVK | 4LZR | 4CJB | 4NRV | 4OY7 | 4Y07 | 3WVS | 4C4A | 4B7B |
| 4J0M | 4LQ4 | 4MM7 | 4NKL | 4JZ5 | 4BTK | 3ZK9 | 4M7G | 4CIK | 406U |
| 4CGE | 4MLN | 4MYV | 4NNG | 4M5B | 4K6E | 4BEC | 4QYG | 3ZQ3 | 4Q67 |
| 4XPW | 4UWH | 4MU6 | 4PJ3 | 4KYQ | 4LU3 | 4K3A | 4M7R | 4QBW | 4PGI |
| 4BRS | 4PSF | 4MDA | 4PF3 | 403Z | 4KEX | 4MFI | 4L4I | 3Z00 | 3ZFZ |
| 4NQG | 4H0J | 4IF5 | 4G09 | 4NAC | 4LG9 | 4V2B | 4CN9 | 4BG4 | 4MRY |
| 4HLJ | 4WFX | 3WBD | 4TWC | 4XXL | 40AI | 4BVN | 4LTW | 3WA0 | 4M6J |
| 3WA7 | 4KAG | 4PDH | 4IFS | 4H7V | 3WL1 | 40GW | 4RG3 | 4NIV | 4LEC |
| 4Q4B | 4PLM | 4N5Q | 4JJJ | 4LYQ | 4QAP | 3ZM7 | 4LYP | 4BMD | 4PD3 |
| 4NXW | 4CU7 | 4I0B | 3ZFK | 4NJ6 | 3X0D | 4P40 | 5AH0 | 4P6A | 4LLA |
| 4QBH | 4RU0 | 3WI7 | 4C7M | 4AZN | 4N1I | 4PII | 4C41 | 4N17 | 4U0S |
| 4YWH | 4PEW | 4N3T | 4S19 | 4LJN | 4NWF | 4V2E | 4YU8 | 4TVW | 4MAI |
| 4MDT | 4M1R | 4LDC | 4R58 | 4NNB | 4CI4 | 4TVE | 40Q2 | 4PMH | 3WHN |
| 4CZE | 4C5F | 4LD6 | 4N4G | 4MRQ | 400Y | 3WCX | 4TLG | 4NUZ | 3ZHL |
| 4N6C | 4U2F | 4N3E | 4GZK | 4N6K | 4UWD | 4Q1U | 4K0B | 40BY | 4MWI |
| 4HPH | 4CIL | 4JGW | 4UR9 | 4JGU | 4BQ4 | 4G78 | 4N9W | 4J2R | 4N0F |
| 4MIJ | 4BJX | 4C1I | 4BY0 | 4BME | 4NS4 | 4HKH | 4N73 | 40PI | 4CDN |
| 4XCT | 4IUH | 4QUC | 4K55 | 4009 | 4C2R | 4UA8 | 4TLW | 4NET | 4RK2 |
| 4NMU | 4BA7 | 3WDH | 4U63 | 4LW9 | 4P68 | 4H0F | 4J1L | 4V1S | 4TWL |
| 4R43 | 403W | 4N4U | 4CHE | 4JZ4 | 4MQ1 | 4M7T | 4CVI | 4M16 | 4LX9 |
| 4BXV | 3VVH | 4BFA | 3W00 | 4W88 | 4WFI | 4PNY | 4QRL | 4KYS | 4LGX |
| 4BVJ | 4J0U | 4XPX | 4IM4 | 4PYG | 3WJV | 4YYL | 4CB8 | 40W0 | 4YGT |
| 3WVN | 4RUU | 4X0J | 4RVQ | 4L8L | 4Y2C | 3ZPJ | 3ZJ7 | 4KPB | 4YIJ |
| 4X3J | 4TR5 | 4PZS | 4BVK | 4XPZ | 4USR | 4R0E | 3ZK8 | 4JKQ | 4LHL |
| 4NYH | 4WKQ | 4QBF | 4GNU | 3W57 | 4XCU | 4J18 | 4N7E | 3W6R | 4HKG |
| 4WPZ | 4QVR | 4NJ5 | 4N77 | 4QRK | 40RL | 4NCN | 4L1P | 4MXY | 4U28 |
| 4BPF | 4Q4T | 4OR7 | 4OQ1 | 4PWN | 4KC8 | 4R09 | 4REK | 4QPC | 4UBS |
| 4TSQ | 40W2 | 40F0 | 4HCW | 4PTX | 3WPZ | 4MMI | 4MPZ | 4LE3 | 4J8Y |
| 4JGG | 4PYR | 4NPK | 2YN8 | 4PVH | 4CB5 | 402I | 4K13 | 4C09 | 4W7G |
| 4H5Y | 4Q60 | 4MUP | 4KG3 | 4PM0 | 40LL | 4LNV | 4XJ6 | 4IP1 | 4WF2 |
| 40HH | 4NA6 | 4NLS | 4LPQ | 4CCW | 4W7N | 3W2X | 4R3F | 4PX7 | 4KYP |
| 3WLD | 4MKB | 4KSB | 3WNY | 4B41 | 3WN6 | 4KMP | 4V33 | 4IYT | 4UAV |
| 4U86 | 3WKG | 4IBZ | 4NRP | 4K6X | 4ULX | 4CIU | 40X3 | 4NBS | 4MNK |
| 4LNY | 4C90 | 4WF0 | 4BIH | 4V24 | 4QSG | 4LHK | 4W6T | 4L6X | 4NF0 |
| 4BPR | 4K1S | 4C1S | 4NWK | 4U1D | 4Q3G | 40NZ | 4N6H | 4J1Q | 4I93 |
| 4KDC | 4QNX | 4BIG | 4KIE | 4C6Y | 4WA0 | 4P0Z | 4IBM | 4NPW | 4LXD |
| 3ZHI | 4LX8 | 4NLU | 4M90 | 4Q46 | 4D20 | 4NWG | 4RS2 | 4HH8 | 4LRJ |
| 4RDP | 4L5G | 4IBT | 4LZ3 | 4HMO | 4RXU | 4LHF | 4MT5 | 4QDZ | 4H1B |
| 4RKB | 4PNL | 4R6F | 4UQX | 3WR0 | 4WXE | 4GWF | 4MMB | 4HNQ | 4L7T |
| 4P0L | 4MAG | 3WGK | 3W09 | 4LJS | 4TLR | 4HLL | 4QXD | 4JXH | 4P0K |
| 40GH | 4X00 | 4NCH | 4NMZ | 3WCK | 1CVR | 4KG6 | 4WXQ | 4S1E | 40AC |
| 4P1T | 4WTX | 3WBG | 4UZJ | 4M5X | 4LV7 | 4M4V | 4K6G | 406K | 4C0S |
| 3WI3 | 4BX8 | 4WOD | 4R9N | 40HN | 40G6 | 4Q11 | 4QAJ | 4Q98 | 4PQ1 |
| 4JLV | 40GN | 4C43 | 4I9L | 40HD | 4QAH | 4PQQ | 4MYT | 4WED | 4INN |
| 4064 | 40IY | 4C84 | 40VQ | 4QB4 | 4L4P | 4RN7 | 40PB | 4B46 | 3WGM |
| 4BY2 | 3WMY | 4NLB | 4TX2 | 4LS3 | 4QPS | 4L54 | 40BC | 4R1K | 4LGC |
| 4BMB | 4US3 | 4M2W | 4ITC | 4NLP | 4WJS | 4WXS | 4M9K | 4N8I | 4CNM |
| 3WBE | 4BZS | 4L3F | 4QEF | 4JAC | 4TXD | 4RGJ | 40T7 | 4RGI | 40AE |

|      |      |      |      |      |      |      |      |      |      |
|------|------|------|------|------|------|------|------|------|------|
| 4N1G | 4OJ3 | 4Q7F | 4FRX | 4N19 | 4IL1 | 4W81 | 4PYP | 4QKS | 406X |
| 4LQ8 | 4KCA | 4CRH | 4P2K | 4LG3 | 3WIX | 4WSL | 4NQR | 4JSD | 4XDQ |
| 4XX6 | 4KCB | 4OCV | 4M56 | 4LA9 | 4LWE | 4JXD | 4PFW | 4LA2 | 4IXA |
| 4NPD | 4L5W | 4IBQ | 4WCK | 4PTG | 4NZ6 | 4GFX | 4NQN | 4C3Q | 40A2 |
| 4R1V | 4RWE | 4IYA | 4HK8 | 4KDW | 4C2P | 4O9D | 4INK | 4WWP | 4089 |
| 4WUN | 4NL4 | 4R8N | 4M4N | 3W9F | 4CMP | 4CJ6 | 4L60 | 4JCM | 4IIR |
| 4C7G | 4IPD | 4XPL | 4CCZ | 4WH9 | 4U0L | 4CMT | 4LTY | 4V0K | 40CJ |
| 4RY0 | 4QL1 | 3ZLB | 40LT | 4MU9 | 4KBK | 4YHC | 4PGN | 40TK | 4PRJ |
| 4JG4 | 3W9R | 4N3S | 4R1U | 4WEV | 4KVL | 4BKR | 4DA2 | 4IRF | 4XD0 |
| 4XAP | 4G0H | 4QDT | 4GRJ | 4LSY | 4NMW | 405J | 4D6I | 4S1P | 3WMR |
| 4P5U | 4NAM | 4D2R | 4ID4 | 4NH0 | 3X0W | 4RX3 | 4PFS | 4UDR | 4M1K |
| 4G3A | 4094 | 4NT1 | 404U | 4LDG | 4P0T | 3WEB | 4U7L | 4BHL | 4KGT |
| 4QFU | 4P3L | 4WD1 | 4QFL | 40ZS | 4CD8 | 4PMB | 4HA2 | 4PQH | 4TMX |
| 4UV6 | 4KQP | 4JWF | 4JL2 | 40HX | 4NS0 | 4MBS | 40VK | 4QT9 | 4CAG |
| 4NXJ | 4MGQ | 4QMH | 4MB1 | 4Q6T | 3WD0 | 4BZX | 4D77 | 3X2T | 40ZW |
| 4PSR | 4YE0 | 402L | 4XRE | 4CG1 | 4P10 | 4RV1 | 4NW6 | 4CGS | 4IP6 |
| 4U3T | 4U3H | 4PQK | 4KG0 | 3ZNY | 4LVQ | 4LY1 | 4U7K | 4CNL | 3ZJA |
| 40JH | 3X17 | 4CS0 | 4RS3 | 4U4E | 4RSX | 4C16 | 4RJ8 | 3WYA | 4JXE |
| 4W4M | 3W1D | 4X90 | 4QU4 | 4IN0 | 4Q3X | 4G4P | 4R2F | 4YHS | 4BVC |
| 3WE9 | 4P0D | 4L3U | 4X9P | 4JR7 | 4L2H | 4M8V | 4URL | 4LXW | 4R7R |
| 4HSC | 4PMK | 4K89 | 4JJ0 | 4PEU | 4PQI | 4M30 | 4IK1 | 4IZX | 40LI |
| 4QK2 | 3WLI | 4RPV | 4LWM | 4KRN | 4MDY | 4QTC | 4UWP | 4X56 | 4RNZ |
| 3WCZ | 4N0P | 4X7K | 4CT2 | 4W7D | 4KZG | 4NV6 | 4PE2 | 5AF5 | 4RZP |
| 4KB0 | 3VXG | 4R0Y | 4MES | 4PQ9 | 4MN6 | 4NPS | 4GL1 | 4U2D | 4JDG |
| 4N8Y | 4QI9 | 4BW8 | 3WIV | 4PCF | 4PPL | 4RUW | 4B8E | 4PHR | 3WH9 |
| 4P47 | 4PM0 | 4U0T | 4Q28 | 404P | 5AJ8 | 4CD0 | 4K7K | 4KNH | 4BFM |
| 4LL9 | 4OPL | 4QDH | 4TT6 | 4RH0 | 4R1S | 4YYF | 4H0Z | 4D72 | 4Q9P |
| 40K0 | 4XXR | 3ZFX | 4M5I | 4TRK | 4TTR | 4CYF | 4WE6 | 4LJ6 | 3W0P |
| 3WV4 | 40F6 | 3ZNT | 4W9S | 4M6H | 4PVJ | 4L90 | 3WAR | 4H48 | 4C2N |
| 4MNC | 4IYC | 4TJV | 4PPK | 4FF5 | 4PNE | 4R6J | 4M3A | 4M83 | 3WEC |
| 4JMN | 4MRH | 4N6W | 408M | 2YN1 | 4N67 | 4WSQ | 4D1T | 3W53 | 4PBQ |
| 3W94 | 4P4G | 4HDH | 40CF | 4CVB | 2JAC | 4R3V | 3WPY | 4PXG | 4N8H |
| 4PFI | 4JCL | 4CSB | 3WZU | 4LBA | 4D7R | 4RWR | 4B0K | 4QTD | 4J9B |
| 4KMW | 4LH6 | 4LRD | 4PQX | 4C7P | 4J9J | 40XI | 4BS6 | 3WIB | 4RQR |
| 4W7M | 4C0P | 4U5A | 4LYR | 4AYS | 4TYP | 4095 | 4P32 | 4IDI | 4KF3 |
| 4HCS | 3WFL | 4PQZ | 40VJ | 4QS8 | 4LBL | 4Q3Y | 4KI9 | 4Q65 | 4IK2 |
| 3W7X | 4GB0 | 4HIN | 4M0N | 4Q6Z | 4XIJ | 4PY1 | 4R7G | 4Y2A | 4D01 |
| 4JV4 | 4Q6V | 4N71 | 4HAK | 4GYD | 4QPN | 40I9 | 4J00 | 4MDP | 40L7 |
| 4PAA | 4N03 | 4J51 | 3ZCF | 3WWA | 4OFF | 4LES | 4CU9 | 4WRP | 3W9U |
| 4BVV | 4J3W | 3WRZ | 40EN | 3WGJ | 4L1I | 4KUI | 40TW | 4KG4 | 4TPW |
| 3WPQ | 4ME3 | 4PT1 | 4IPG | 4NPH | 4CDB | 4Q24 | 4LTU | 4LAX | 4IQH |
| 40F9 | 400D | 3WNP | 4BMC | 4W65 | 40W1 | 4LRF | 3WUZ | 4P48 | 4D1U |
| 4C54 | 4QTP | 4C0T | 3ZEW | 40XW | 4N8K | 4CS5 | 40VX | 4U0I | 4MPS |
| 4V2Y | 4MLZ | 4PWZ | 4N6L | 4MJC | 4L40 | 4KEJ | 4LRE | 4P6G | 4MYD |
| 3W1C | 40NU | 4QBV | 4Q3H | 4LM9 | 4LD1 | 4MCK | 4YAY | 4QJK | 4PQD |
| 4NLC | 4CD5 | 4NU0 | 4KB4 | 4KYR | 4WHI | 4L6S | 4X9T | 40DD | 4C6H |
| 4CQH | 400W | 4MKF | 4LIK | 4CNR | 4PFX | 4XP7 | 4C97 | 400K | 4BXM |
| 40GE | 40ZQ | 4HSQ | 4LG8 | 4BMH | 4KN3 | 4I35 | 4YGS | 40ZU | 4MFZ |
| 4CDL | 4K1P | 4TXA | 4XRV | 4MT7 | 3WDB | 4LIZ | 4FX7 | 4YLE | 4WCX |
| 4GVJ | 4LS0 | 4IED | 3WAJ | 4XS5 | 4NNO | 3WYH | 4RSQ | 4KP0 | 4PVK |
| 40MB | 3W7W | 4Y7U | 4LJM | 4MXN | 4NN2 | 4IKG | 4PYS | 4CXK | 4HH5 |
| 4NLR | 4PYT | 40XP | 4KKF | 4FMP | 4M00 | 4C1U | 4PMQ | 4QHE | 4NJ8 |
| 4KL0 | 4M09 | 3Z0Z | 3WPU | 4K05 | 4C3Z | 4QDX | 4W5B | 4PZ7 | 4J4J |
| 4JRN | 4B97 | 4JHV | 4I05 | 40N1 | 3VZ6 | 4J5M | 4BCT | 4RJZ | 4CNX |
| 4PL2 | 3WT0 | 3WG6 | 4LDF | 4MZD | 4NF7 | 4LPS | 4X2R | 4C49 | 4U4J |
| 400S | 4MDW | 4Q3Z | 4LPI | 4MEZ | 4Q5W | 40N0 | 4L1L | 40LJ | 4NXT |
| 4M85 | 4IGI | 4Q5I | 4BQH | 4QDR | 4NX9 | 4Z2X | 4WV5 | 3WVF | 4LMH |
| 4RNX | 4BZ7 | 4INZ | 40NY | 4PZ0 | 4MTN | 4MXG | 4Q1Q | 4LUU | 4GXZ |
| 4QN1 | 4L1Y | 4QD4 | 4TK0 | 4Q7G | 4H05 | 4XUY | 4GQP | 4J6P | 4MHP |
| 4L77 | 5AGD | 4M02 | 4KB2 | 4QKT | 4RZ2 | 4D7Q | 4Q6B | 4CG0 | 4BLU |

|      |      |      |      |      |      |      |      |      |      |
|------|------|------|------|------|------|------|------|------|------|
| 4RXM | 4PEF | 4NCI | 4UDQ | 4Q9G | 40GM | 4LYA | 4PC9 | 40RK | 40PG |
| 4X2Y | 400Y | 4MZI | 40GP | 3ZFM | 4RKL | 4HOW | 4W7J | 4C7A | 4YME |
| 4P8B | 4UAT | 4B4L | 4UWW | 4LAE | 4L5U | 4RY5 | 4KM6 | 4LCB | 4RPC |
| 4R3A | 4Z0N | 4LRU | 4N49 | 4V32 | 4K68 | 2YN7 | 4D6V | 4R6K | 4WZZ |
| 4PF8 | 4NOL | 40TP | 4RCG | 4TYZ | 40BM | 4S0V | 4GQG | 4N0B | 40ZD |
| 3WH2 | 408H | 4ME5 | 4BQ1 | 4HYJ | 4QP5 | 4NW4 | 40BE | 4CYS | 4U0R |
| 4WDC | 4B0J | 4D0Y | 4UMQ | 4JXF | 4QKR | 4QB6 | 4J05 | 4KLX | 4XDI |
| 40A5 | 4C0T | 4CMN | 4HQ6 | 3WQT | 4KL5 | 4LJY | 4R5Q | 4NTS | 4R84 |
| 4B5C | 4CZL | 3W0A | 4Q3I | 4LJ7 | 4M2B | 4IJF | 4TRD | 4RY0 | 4CQ8 |
| 40VS | 4YYX | 4MMP | 4XE0 | 3WL0 | 4UY6 | 4TKB | 3WIW | 4P7B | 4RCW |
| 4D0Q | 4PKX | 40FQ | 4S1J | 4MMJ | 40PT | 4LE7 | 3WHI | 4V2D | 4L2L |
| 4Q09 | 4N6M | 4Q6X | 4CHJ | 4CT5 | 4N9T | 4Q5T | 4QP0 | 4XA7 | 4LEU |
| 4PN7 | 3WRT | 4JA2 | 4REZ | 4N0L | 4KSE | 4NLT | 4QHQ | 3WEK | 4N75 |
| 4LUR | 4BPY | 400N | 4CYR | 40NR | 4JZQ | 4LWL | 4PSC | 4RKE | 4LWK |
| 407K | 4BUP | 4S06 | 4YMX | 4NA5 | 4C07 | 4BLK | 4Q6A | 4XPY | 4NH9 |
| 4Q6W | 4IZL | 4I2U | 4RW0 | 4K2D | 3WMS | 4JZR | 4Q2S | 4TSM | 4U5X |
| 3ZGH | 4BTF | 4RJ3 | 4N0A | 4TXP | 4C6R | 4V3C | 4U0N | 4MAZ | 4D1A |
| 4P9J | 4PQ8 | 4XTL | 4JS7 | 1SCN | 4GWR | 4Q8I | 3ZL8 | 3ZMR | 4XY3 |
| 3ZM3 | 4TNS | 4U98 | 4UWJ | 4M1B | 4QKN | 4TZG | 40YV | 4WQN | 4MZ2 |
| 4QDI | 4CSH | 40QS | 4D04 | 4U8Z | 4Q8K | 4D6D | 4QX5 | 4BPZ | 4UML |
| 4FS0 | 4P3K | 4WMH | 4R4G | 4MQM | 3K8L | 4TVF | 4J1P | 4TN2 | 4PM4 |
| 4TPK | 4H5R | 4LGM | 40RW | 4Y93 | 4CHD | 4MST | 4TZ1 | 4PC4 | 40ER |
| 4UF0 | 4Q7Q | 4PS6 | 4B2N | 4Q3J | 4U9U | 4BJI | 4LWR | 4LKP | 4H8H |
| 3WL5 | 4NLQ | 4M8K | 3WPN | 4R0V | 3WBI | 4XUZ | 4MNO | 4Q2A | 4BJ0 |
| 4QIM | 4LQT | 4LJX | 4C5P | 3WPV | 4XXN | 4BZ4 | 4P03 | 4PAG | 4LUA |
| 4PPF | 4NZ7 | 4J0L | 4PP0 | 4M0H | 4JPM | 3WAL | 40ZB | 4MYR | 4IMH |
| 4D40 | 4JFN | 4PWP | 40GZ | 4Y95 | 4MC3 | 4WCM | 4N1L | 4UXV | 4L21 |
| 4R6Y | 4UTO | 4PEV | 4QA8 | 3W0R | 4RVA | 4NG0 | 4N13 | 4H9J | 4NDC |
| 4YMQ | 4UXQ | 4QME | 4PM5 | 402R | 4RGL | 4X2J | 4H7U | 4QNW | 4UYN |
| 4BSM | 4BEB | 4M70 | 4QQC | 4WD6 | 4P1E | 4PQB | 4TYJ | 4XUF | 4R03 |
| 4QUN | 40F5 | 4RG8 | 409F | 4QGL | 4R9P | 4M46 | 4UYD | 4LUN | 4RTH |
| 4M7U | 4WHZ | 4ICU | 4B9P | 4H60 | 4L4F | 4KDR | 4PQW | 4UY1 | 40R1 |
| 4JRB | 4ROB | 4CIH | 4NQ0 | 4R6G | 4UR0 | 4RM4 | 4NLW | 4IXL | 4YS6 |
| 4IV0 | 4XHM | 4UIX | 4UBG | 40M9 | 4P27 | 40CC | 4CD3 | 4N5C | 40SN |
| 3WDF | 4B0E | 4TR3 | 3VW8 | 4M29 | 4MXP | 407M | 4JMP | 4QX0 | 4NDX |
| 4MYG | 4D1V | 4NPM | 4WCV | 4V20 | 4LAB | 4QI0 | 4UYB | 40EB | 4HKL |
| 4TUM | 4NCE | 4YDW | 4U0N | 40PU | 4NS2 | 4M2L | 4QKF | 4NZK | 3VW0 |
| 40CE | 4PK1 | 4MYQ | 4J7Z | 4NRU | 4U9B | 4PT6 | 4WHA | 4JFS | 3ZBT |
| 4RY1 | 4U2E | 4URG | 4KJT | 4WUT | 4Q59 | 4P5P | 4R3H | 4FSP | 4NQ8 |
| 4C0M | 4R0M | 4N8L | 4Q0S | 4Q4L | 4K1X | 4KW4 | 4N0K | 4X2Z | 4CP1 |
| 4P5Q | 4LSC | 4PBD | 4Z1F | 4BE7 | 4S1N | 4RKS | 4WT9 | 4QRJ | 4LGY |
| 4NPF | 4QGO | 4QDG | 4QC6 | 4B0B | 4PE6 | 40HL | 4RAW | 4NFC | 4LRM |
| 4IM9 | 4CEM | 4L4D | 40RI | 40TH | 3W0B | 4NUH | 3WIJ | 4M1N | 4RA4 |
| 4JD0 | 4BN2 | 4RFZ | 4R5C | 40X2 | 4H1V | 4MEC | 4R7S | 3WPT | 405S |
| 4M66 | 4TWP | 3WGE | 4D4B | 4M0M | 4XV0 | 4B9C | 4PYH | 4TZA | 4UY3 |
| 4BZF | 40XX | 5AF0 | 4UBQ | 4WXT | 40BI | 4PSJ | 4C9Y | 4CUF | 4QB0 |
| 4R1B | 4NFD | 404X | 4RY7 | 4R6H | 4LQM | 40U0 | 4TMV | 4RSM | 40M0 |
| 4N7X | 4V14 | 4MY4 | 4WEK | 4QEY | 4PDY | 4D4Q | 4U9V | 4JD9 | 4006 |
| 4P84 | 4TQL | 4BZA | 4N30 | 4IJT | 40GB | 40A3 | 4CRQ | 4PLA | 4LPL |
| 4IMB | 3WL6 | 4L5Q | 4TYQ | 4MMH | 4PC8 | 4B6L | 4RVZ | 4W9T | 3WBW |
| 4RXL | 4LX4 | 3WFN | 4QAN | 4QQ6 | 40PW | 4L7G | 4JLF | 4CNK | 4P9A |
| 4N5X | 4LM8 | 4N0D | 4NY6 | 40NQ | 4PXA | 4N6D | 4Q7Z | 3WAQ | 40JG |
| 4K3C | 4NX1 | 4NXC | 4U3D | 4PWT | 4N0H | 4QQJ | 4KVX | 4YCS | 4NZZ |
| 4MT6 | 4N6V | 4CFP | 4PX6 | 4M97 | 4I00 | 4I5P | 4QQG | 4PQC | 4PKW |
| 40HE | 4W7K | 4WUY | 4QB8 | 4D6J | 4NNK | 4W5W | 4NLX | 4W8F | 4R3E |
| 4BEW | 40EE | 4LWJ | 4PYI | 4BVL | 4UW9 | 4NXY | 40JB | 4XQ1 | 4PQG |
| 4WCJ | 4JLP | 4WEE | 4NG7 | 4UVK | 4D1W | 4LOS | 4ILE | 4PGK | 4PXW |
| 4D71 | 4NDB | 40E9 | 4W79 | 4KSM | 4PRW | 4K9F | 4KQ8 | 4MCO | 4U6R |
| 4LZ2 | 4HU8 | 4KRS | 4N5A | 4QLR | 4XAH | 4KS7 | 4MAA | 3WRH | 4PFY |
| 4TVT | 4GAZ | 1BDA | 4QA4 | 4UT1 | 4ORF | 4XKK | 4MFK | 4IWB | 4PA0 |

|      |      |      |      |      |      |      |      |      |      |
|------|------|------|------|------|------|------|------|------|------|
| 4CNW | 3W95 | 4QEK | 4WAT | 4NA4 | 4OY9 | 4PV6 | 4JPX | 4RXX | 4PUT |
| 4LCL | 4B62 | 4QT4 | 4NHX | 4PFO | 4KZV | 4GGV | 4OVT | 4WXJ | 4C1R |
| 4P8S | 4CBH | 4LZH | 4OG4 | 4WWH | 4N3G | 4YV7 | 4TNM | 4QTA | 4IPU |
| 4MB5 | 4JVL | 4NL0 | 4WT7 | 4ICW | 4BGC | 4RX2 | 4K46 | 4JJC | 4IGY |
| 4S2V | 4CK8 | 4OR4 | 4O1N | 4NZJ | 4M9T | 4NDD | 4PYZ | 4JNW | 4PMX |
| 4RXV | 4H10 | 4QGY | 4P66 | 4IPC | 4XFE | 4QHF | 3WBA | 4XXT | 4CBY |
| 4OQV | 4MUX | 3WH7 | 4NLV | 4JP8 | 4MEE | 4W7L | 4O0U | 4QLF | 4KVK |
| 4RDN | 4PED | 3WIU | 4OFJ | 4XH7 | 4OYL | 4IDY | 4R0A | 4Q2R | 4PL7 |
| 4QAK | 3WUX | 3WCA | 4Q3W | 4NHB | 4RF6 | 4J25 | 4OZV | 4O6Q | 4NNH |
| 4IHK | 4XXP | 4C1W | 4QK1 | 4UU6 | 5AIL | 4KX7 | 4WF8 | 4C8X | 4PH8 |
| 4O9X | 4R1A | 4LKS | 4QN8 | 4XUX | 4QYY | 4Q0N | 4TZJ | 4P0J | 4U2C |
| 4O0U | 4D2S | 4BPS | 4HBA | 4WJ2 | 4QFI | 4KKI | 4M9B | 4M65 | 4LR8 |
| 4NBP | 4TVV | 4NLM | 4LBW | 4M88 | 4U2G | 4L22 | 4Q38 | 4CBE | 4URI |
| 4XNV | 4D5A | 4LXJ | 4IT3 | 4KII | 4XV0 | 4NE4 | 4UAS | 4QMI | 4LC2 |
| 4REL | 4RTF | 4U70 | 4U7A | 4KGR | 4P17 | 4NLO | 4OXJ | 4X7R | 4QBG |
| 4IVV | 4AUR | 4UZ1 | 4KH3 | 4BK7 | 4K9J | 4CNV | 4KGS | 4L9H | 4NKT |
| 4RI4 | 4JMU | 4K77 | 4XVC | 4U2B | 4C76 | 4X8R | 4NCS | 4L6U | 4OK0 |
| 4PAQ | 4L2J | 4NSX | 4Q00 | 4N5U | 4RL1 | 4UW3 | 4JWH | 4JF5 | 4K07 |
| 3X10 | 4QE3 | 4RNF | 4RN0 | 4NYQ | 3WEJ | 4MNL | 4W8Y | 4TZI | 4MAN |
| 4KAW | 3WP5 | 4O2W | 4WE7 | 4KAV | 4PWQ | 4Q08 | 4Q1Z | 4OEC | 4R21 |
| 4U9S | 3W4R | 4QPV | 4OZC | 4Q9T | 4IMM | 4MCU | 4ITK | 4U0M | 4O8V |
| 4Q8L | 4FT6 | 4CX0 | 4RYE | 3X2S | 4OEV | 4PMS | 4WNW | 4Q4F | 4C00 |
| 4O8S | 4FRT | 4MIU | 4JPO | 4RNW | 4PWS | 4O7Q | 4PWO | 4C20 | 4OUQ |
| 4P2I | 4ID8 | 4LZ0 | 4PDN | 4UTC | 4WH8 | 4M03 | 4WH6 | 4N74 | 4NEJ |
| 4OKU | 4CS6 | 4CZG | 4P1Q | 4NN3 | 4NTJ | 3ZM1 | 4DAP | 4XZG | 4MI7 |
| 4B43 | 4XQ7 | 4PZP | 4KX4 | 4V28 | 4U48 | 4IT7 | 4K0W | 4LY7 | 4YGU |
| 4Z9M | 3WX5 | 4P6Q | 4MHC | 4M9P | 4LLI | 3WLQ | 4JNI |      |      |
